# Supplementary material for: Degradation mechanisms in low-voltage Wadsley–Roth TiNb2O7 electrodes upon cycling with Li
Source: Royal Society of Chemistry journal article supplement (doi:10.1039/d4ta06441k), 2025-01-01
Supplement: d4ta06441k2.xlsx [file d4ta06441k2.xlsx]

## Sheet: Insitu - 1
Angle	Li 0	Li 0,25	Li 0,5	Li 0,75	Li 1	Li 1,25	Li 1,5	Li 1,75	Li 2	Li 2,25	Li 2,5	Li 2,75	Li 3	Li 3,25	Li 3,5	Li 3,75	Li 4	Li 3,75	Li 3,5	Li 3,25	Li 3	Li 2,75	Li 2,5	Li 2,25	Li 2	Li 1,75	Li 1,75	Li 1,5	Li 1,25	Li 1
16	25660	25988	25998	26149	26614	26244	26356	26383	26516	26542	26740	26894	26254	26760	26685	27487	27382	27522	27462	27560	27582	27689	27755	28040	27099	27293	27154	27294	27110	0
16.016	25703	26446	26185	26414	26354	26293	26471	26460	26374	26867	26631	26797	26594	26548	26962	27090	27550	27481	27781	27670	27963	27748	27910	28072	27603	27125	27297	27418	27262	0.0002714
16.032	26308	26343	26400	26309	26291	26337	26413	26737	26674	26703	26670	26574	26690	26914	27258	27448	27441	27730	27588	27645	27934	28322	27914	27789	27475	27342	27273	27309	27338	0.004
16.047	26406	26563	26338	26336	26256	26777	26722	26425	26790	26708	26858	26954	26599	26832	27049	27513	27735	27765	27701	27781	27833	27830	27843	28103	27213	27389	27346	27194	27439	0.005
16.063	26147	26469	26588	26433	26558	26717	26520	26661	26928	26724	27016	26835	26984	27029	27184	27847	27723	27699	27811	27536	27702	27958	27770	28127	27393	27469	27392	27484	27312	0.003
16.079	26356	26543	26719	26624	26647	26852	26826	26694	26996	26895	27020	26981	26889	26861	27128	27618	27716	27878	28037	28042	28007	27866	28114	28264	27412	27183	27613	27583	27368	0.004
16.095	26270	26636	26509	26390	26640	27156	26825	26888	26782	26800	27064	27152	27014	27352	26929	27995	28256	28051	28280	28247	28104	28131	27996	28184	27530	27416	27458	27468	27267	0.004
16.11	26188	26380	26496	27002	26694	26858	26899	26941	27005	26967	27009	27329	27282	26991	27172	27587	28083	28344	28071	28104	28079	28139	28228	28082	27536	27665	27549	27842	27611	0.003
16.126	26508	26770	26728	26900	26815	27075	27189	26662	26957	27104	27390	27150	26980	27075	27514	27878	27788	28012	28199	28171	28160	28075	28303	28320	27866	27527	27814	27722	27595	0.005
16.142	26621	26787	26700	27052	26820	27160	27222	26810	26960	27422	27463	27308	27084	27010	27124	28047	28159	28096	28506	28223	28423	28195	28098	28230	27663	27736	27545	27888	27767	0.006
16.158	26746	26967	26937	26794	27186	27042	27178	27318	27142	27156	27490	27203	27349	27397	27498	27982	28010	28250	28366	28518	28428	28345	28505	28499	27992	28080	27977	27973	27862	0.007
16.173	26523	26544	26772	26986	27098	27161	27017	27054	27174	27237	27563	27401	27809	27145	27474	28087	27932	28180	28455	28429	28399	28049	28301	28399	27679	27694	28072	27768	28086	0.005
16.189	26913	26783	26813	27217	27149	27057	27186	26725	27387	27303	27451	27467	27545	27580	27736	28100	28756	28033	28239	28557	28372	28593	28461	28558	28029	28080	28069	28031	27576	0.008
16.205	26713	27216	27044	27198	27260	27402	27440	27627	27198	27682	27653	27658	27534	27472	27812	28165	28444	28352	28097	28549	28850	28714	28608	28270	28009	27871	28007	28289	27868	0.007
16.221	26959	27156	27213	26960	27308	27333	27379	27379	27345	27395	27606	27627	27415	27716	28011	28128	28515	28578	28779	28312	28599	28564	28509	28792	28056	28079	28390	28099	27883	0.008
16.237	26549	27012	27202	27174	27644	27183	27402	27643	27535	27361	27540	27624	27942	27758	27804	28537	28670	28592	28553	28706	28859	28700	28648	28703	28070	28116	28119	28254	28013	0.006
16.252	26636	26924	27505	27295	27463	27181	27491	27158	27881	27449	27672	27881	27860	27625	27992	28175	28819	28916	28700	28684	29053	28695	28762	28868	28228	28074	28338	28463	28268	0.006
16.268	27037	26944	27441	27592	27297	27595	27708	27630	27388	27574	27950	27888	28124	28122	28053	28672	28637	29050	28527	28547	28688	28628	28812	28816	28429	28257	28218	28221	28350	0.009
16.284	27133	27241	27270	27732	27517	27402	27464	27531	27678	27831	28045	27943	27958	28066	28114	28358	29068	28634	28862	28998	29152	29014	29059	28995	28548	28397	28558	28602	28581	0.009
16.3	27023	27515	27489	27487	27562	27571	27675	27801	27701	27940	27768	28071	28240	28109	28389	28387	29013	28776	28896	28906	29260	28939	29213	29340	28493	28570	28246	28566	28687	0.009
16.315	27110	27369	27628	27613	27856	27617	27714	27708	27903	27657	28006	28149	27792	28094	28376	28743	29068	28918	28943	28744	28793	29165	29011	29255	28586	28721	28390	28250	28279	0.009
16.331	27456	27797	27841	27808	27790	27814	27613	27906	27732	27887	28209	28030	27979	28196	28384	28699	29220	28875	29140	29162	29019	29088	29282	29084	28361	28443	28485	28215	28678	0.011
16.347	27317	27490	27331	27646	27814	27741	27842	28142	27696	28145	28137	28095	27987	28205	28469	28933	29148	29028	29590	28930	29193	29038	29235	28919	28752	28737	28427	28531	28698	0.01
16.363	27402	27529	27481	27908	28094	28054	27944	28034	28045	28093	28137	28420	28475	28217	28659	28786	29167	29347	29507	29271	29208	29639	29121	29438	28946	28848	29028	28552	28753	0.011
16.378	27478	27510	27450	27696	27929	27674	27787	28059	28335	27933	28301	28424	28335	28326	28781	29114	29274	29409	29214	29328	29326	29322	29215	29413	28793	29027	28894	28946	28839	0.011
16.394	27538	27787	27589	27998	28202	28034	28026	28307	28406	27953	28457	28208	28349	28360	28803	29253	29500	29479	29738	29309	29395	29509	29548	29120	29245	29267	29062	28870	29043	0.012
16.41	27392	27946	28038	27879	28066	28071	27947	28618	28448	28077	28584	28460	28344	28460	28644	29080	29407	29147	29546	29220	29326	29270	29555	29354	28977	28993	28959	28746	28934	0.011
16.426	27333	27942	28318	28066	28037	28131	27683	28236	28122	28578	28633	28583	28389	28272	28782	29166	29335	29693	29430	29574	29548	29212	29447	29364	28979	28973	28959	29238	29097	0.011
16.442	27949	27689	28224	27871	28175	28220	28560	28419	28545	28614	28649	28741	28252	28765	28713	29130	29457	29229	29484	29399	29699	29408	29298	29530	29183	29027	29191	29377	29059	0.014
16.457	27922	27920	27936	27928	28110	28292	28720	28421	28408	28890	28453	28751	28692	28885	28915	28896	29467	29558	29577	29616	29725	29895	29930	30004	29299	29182	28636	29448	29257	0.014
16.473	27973	27974	28564	28295	28277	28618	28598	28256	28706	28616	28561	28809	28857	28818	28725	29135	29825	30049	29744	29413	29950	30060	29788	29499	29090	29230	29331	29651	29402	0.015
16.489	28273	28104	28221	28359	28593	28700	28127	28223	28648	28662	28711	28879	29037	28902	28739	29376	29498	29592	29659	29789	29768	29626	29946	29805	29484	29360	29121	29343	29505	0.016
16.505	28028	28529	28257	28053	28157	28472	28809	28503	28719	28796	28719	28560	28514	29064	29129	29401	29774	29801	29792	29913	29859	29767	30075	29850	29415	29144	29383	29302	29361	0.015
16.52	28150	28333	28344	28672	28480	28850	28753	28765	28643	28938	28980	28932	29208	29212	28986	29548	30005	29849	29595	29905	29933	29940	29623	29864	29214	29268	29733	29622	29407	0.016
16.536	28287	28210	28426	28384	28748	28612	28645	28849	29097	29083	29041	28925	29208	29185	28680	29713	29974	30205	30055	30115	30053	29930	29985	30269	29597	29814	29593	29483	29723	0.017
16.552	28303	28431	28416	28561	28515	28971	28637	28762	28949	29006	28993	28751	29005	29183	28992	29340	30007	30021	29816	30000	30222	30194	30192	29954	29619	29461	29802	29689	29493	0.017
16.568	27990	28564	28789	28744	28765	28588	28716	28974	28827	29324	29235	28901	29309	29372	28994	29143	29887	30040	30071	30208	30395	29940	29976	29984	29490	29625	29967	29765	29695	0.015
16.583	28316	28560	28574	28925	29122	28867	28941	28960	29331	29149	29152	29488	29270	29162	29591	29702	30169	30208	30225	30306	29960	30158	30180	30305	29746	29950	29917	29871	29804	0.017
16.599	28576	28694	28927	28945	29228	28905	28973	29040	29029	29153	28663	28915	29391	29413	29884	29537	30005	30492	30466	30290	29892	30248	30276	30246	29906	29805	29949	29473	29812	0.018
16.615	28553	28380	28876	28615	29168	28998	28918	29093	29307	29239	29608	29676	29420	29115	29750	29751	30299	30275	30273	29865	30566	30125	30590	30531	30040	30022	29925	29802	30045	0.018
16.631	28867	28608	28754	29209	29188	29151	29162	29164	29436	29244	29129	29305	29088	29624	30082	29999	30370	30540	30192	30097	30060	30113	30216	30157	29905	30252	30007	30080	30185	0.02
16.647	28665	29057	28951	29052	29166	28992	29251	29197	29457	29343	29464	29277	29495	29593	29682	29982	30551	30466	30334	30652	30439	30429	30494	30069	30353	30147	29880	30160	30000	0.019
16.662	28685	28863	29078	29269	29217	29335	29242	29489	29017	29500	29417	29663	29613	29857	30301	29948	30796	30415	30642	30481	30578	30763	30686	30629	30324	30330	30144	30275	30243	0.019
16.678	28755	29152	29033	29706	29399	28938	29375	29482	29512	29315	29503	29737	29738	29931	29897	30486	30698	30690	30522	30454	30763	30349	30670	30742	30218	30293	30289	30501	30356	0.02
16.694	28900	28993	29377	29076	29550	29365	29504	29262	29529	29526	29635	29814	29618	29971	29932	30426	30403	30418	30714	30688	30647	30919	30750	30995	30637	30420	30158	30661	30497	0.02
16.71	29031	29015	29138	29252	29610	29435	29318	29735	29351	29689	29890	29750	29944	29936	29969	30190	31005	30482	30896	30842	30587	30664	30711	30932	30334	30469	30763	30019	30521	0.021
16.725	29130	29688	29215	29458	29606	29352	29446	29787	29321	29776	30167	29722	30007	29843	29975	30739	30999	30929	30680	30589	30771	30804	31088	30962	30227	30440	30648	30524	30546	0.022
16.741	29125	29330	29899	29817	29975	29240	29490	29905	29968	29832	29831	30107	30264	30015	30377	30640	30720	30832	31046	30854	30639	30797	31188	31044	30689	31038	30632	30513	30258	0.022
16.757	29484	29513	29566	29790	29677	29823	29899	29918	29580	30097	30183	30353	30456	30159	30573	30472	31090	30998	30858	31089	30819	30876	30780	31186	30677	30466	30253	30260	30741	0.024
16.773	29438	28969	29312	29672	29590	30085	30104	29975	30172	30285	30158	30620	30177	30376	30325	30579	31210	31326	30590	30945	31204	31021	31284	31297	30987	30614	30755	31136	30694	0.024
16.788	29529	29446	29691	29839	30324	30067	30112	29933	30252	30329	29803	30266	30459	30646	30730	30735	31343	31399	31248	31332	31181	31047	31144	31337	30967	31046	30923	30927	30764	0.024
16.804	29379	29145	29797	30140	29814	30076	29875	30250	30189	29966	30627	30279	30258	30408	30473	30851	31162	31472	31095	31310	31192	31233	31253	31461	30908	31050	30978	30702	30848	0.023
16.82	29543	29718	29857	30264	30430	30173	30161	30325	30318	29964	30366	30635	30256	30716	30494	30692	31014	31266	31067	31379	31264	31527	31355	31296	31104	31159	31139	31172	31173	0.025
16.836	29630	29834	29878	29941	30251	30057	30689	30293	30304	30205	30550	30184	30452	30797	30892	31090	31516	31260	31405	31629	31197	31511	31704	31355	31204	30952	31021	31412	30798	0.025
16.851	29794	29822	30040	30339	30077	30361	30484	30777	30081	30156	30713	30385	30378	30602	30835	30999	31313	31510	31581	31510	31772	31670	31507	31405	31165	31286	31061	31250	30949	0.026
16.867	29815	29881	30026	30339	30325	30215	30438	30592	30268	30341	30712	30660	30742	30836	31110	31361	31609	31700	31524	31715	31263	31458	31916	31585	31432	31175	31224	31330	31518	0.026
16.883	30051	30076	30401	30297	30499	30381	30474	30546	30515	30482	30784	30820	31227	31016	30977	31356	31833	31587	31706	31607	31565	31691	31761	31962	31767	31349	31254	31288	31372	0.028
16.899	29957	30415	30700	30340	30618	30421	30751	30734	30468	30723	30466	30762	30779	30813	30973	31369	31658	31640	31420	31674	31547	31739	31702	31547	31415	31496	31252	31513	31469	0.027
16.915	30085	30238	30893	30494	30487	30543	30644	30812	30718	30776	30656	30957	31018	31217	31413	31715	31967	31842	32071	31810	31708	31874	32178	31769	31511	31538	31393	31381	31061	0.028
16.93	30121	30558	30549	30536	30700	30567	31182	30650	30822	31116	31165	31336	31306	31406	31492	31794	31851	32040	32245	31841	32094	31812	32031	32090	31817	31754	31689	31315	31683	0.028
16.946	30226	30546	30915	31020	30760	30613	30924	30896	30942	31019	31164	31178	31381	31546	31412	31433	32292	32220	31944	31985	32088	32473	32275	31941	32182	31736	31870	31329	31788	0.029
16.962	30651	30437	31198	31024	30909	31051	30968	30952	31265	31148	31036	31244	31233	31432	31517	31707	32410	32312	32166	32124	32291	32521	32370	32411	31957	31929	32009	31739	31880	0.032
16.978	30338	30444	31270	31465	30988	31007	30993	31228	30972	31347	31181	31456	31325	31684	32138	32071	32755	32248	32219	32538	32060	32081	32493	32598	32254	32181	32134	31848	31538	0.03
16.993	30606	30854	31521	31510	31386	31342	31161	30629	31184	31428	31459	31615	31537	31987	32456	32325	32703	32535	32393	32431	32544	32225	32245	32295	32428	32789	32049	32142	31887	0.031
17.009	30499	31019	32255	32065	31565	31203	31358	30950	31056	31169	31347	31683	31615	32014	31957	32444	32502	32853	32607	32287	32384	32666	32797	32511	32640	32710	32217	32294	31938	0.031
17.025	31277	31602	33030	32572	31943	31285	31218	31033	31325	31735	32070	31674	32111	32201	32667	32687	32818	32942	32595	32913	32790	32444	33154	32572	32736	32393	32377	32819	32200	0.035
17.041	30956	31856	34502	32920	32409	31855	31688	31609	31483	31709	31938	31949	31862	32578	32651	32929	33167	32887	32759	33037	32912	32780	32867	32837	32907	33016	32541	32669	32208	0.033
17.056	31050	31575	36169	34110	32669	31759	31543	31956	31609	31378	31640	32055	32336	32931	33121	33277	33347	33092	33134	32732	32786	33055	32558	32973	33313	34095	33030	32795	32119	0.034
17.072	31590	32733	38794	35222	33371	31863	31582	31622	31882	32026	32003	32393	32564	32937	33228	33370	33525	33218	33123	32907	32433	32805	32929	33183	33589	34850	33122	32819	32869	0.037
17.088	31957	33522	42963	36837	34077	32197	32121	31721	32023	32230	31912	32503	32842	33500	33992	33487	33831	33325	33469	33235	32807	33099	33226	33412	34052	36334	33544	32814	32734	0.04
17.104	32301	35091	48900	39052	35187	32775	32201	31984	32499	32266	32449	32411	33025	34134	34799	34362	34011	33746	33219	33310	33199	33445	33279	33026	35071	39148	33988	33609	33223	0.042
17.12	33001	36878	55218	42519	36440	33160	32650	32459	32234	32416	32954	33205	33532	34500	35450	35127	34528	33942	34160	33536	33474	33454	33597	34041	36481	43103	35146	33802	33945	0.046
17.135	33674	40143	60127	45666	37667	33813	32804	32474	32456	32518	32969	33374	34317	35961	37163	36097	35126	34162	34021	33536	33755	33769	33798	34011	37886	48420	36339	34194	34260	0.051
17.151	35662	44319	58445	49537	39158	34310	33327	32717	32679	32954	33266	33965	35163	37381	38696	37372	35930	34505	34183	33922	34084	33472	33720	34094	40512	54706	38546	34974	35000	0.063
17.167	38142	50282	53716	54215	41263	35345	33961	32803	32662	33323	33606	34179	36780	39260	41562	39386	36887	34957	34418	34209	34234	34198	34333	34694	45138	59870	41852	36491	35725	0.079
17.183	41435	56180	48429	59998	43518	36097	33951	33092	33513	33595	34079	35628	39035	43112	46525	42126	38492	35103	34956	34521	34358	34412	34135	35624	50680	58878	46479	38394	37661	0.1
17.198	47359	59387	44098	65577	46031	37309	34516	33837	33907	34022	34740	36389	42115	47504	53212	46699	40399	36319	35147	34657	34811	34646	34482	35888	57129	54686	51195	40370	40000	0.137
17.214	53801	56343	39872	68937	49188	39142	35297	34334	34112	34547	35799	38513	46824	55143	61636	54127	44321	37321	35910	35649	34911	35013	35287	37270	61125	50858	57760	43496	42674	0.178
17.23	58838	50958	37637	67908	53370	40044	36219	34664	34428	35065	37357	41738	53403	63851	69859	63593	49856	38566	36528	35435	35008	35583	35555	38279	62077	47107	60020	48266	47350	0.209
17.246	56841	45826	38000	65507	57699	43233	37079	35306	35205	36560	39348	46208	62153	71037	73374	71992	58537	41029	36916	36048	35474	35217	35540	39879	62562	43140	56653	54787	53694	0.197
17.261	51766	41119	39859	60449	63371	46098	37994	36099	35965	38121	42640	52485	68583	72087	69627	74236	68266	44246	38255	36345	35636	35721	36480	41974	61555	42558	52199	59885	59602	0.165
17.277	47017	37314	42752	54426	67858	49787	39435	36997	37219	40259	47113	60163	70896	67326	62669	68953	74359	50039	39861	37611	36811	36345	36951	45950	61013	42998	48134	59220	59902	0.135
17.293	41892	35862	46919	48363	71630	54591	42019	38465	39488	43559	53397	68479	66380	60512	56035	62298	72545	57617	42279	38516	37095	36333	37418	51003	60931	45072	43587	54960	55315	0.102
17.309	37776	35416	50498	44016	72482	61041	45039	40097	41758	48617	61363	70182	59905	53208	48724	54718	66395	66905	46454	40355	37686	37373	38454	58063	59764	48308	41001	50359	51051	0.076
17.325	35645	36599	51849	40021	70948	67953	49085	42729	45414	55418	67549	65844	53381	45970	43063	47314	59368	72876	52048	42987	38989	37616	40096	65924	57348	52595	39848	46126	46043	0.063
17.34	34816	38909	49121	37681	65448	75207	53978	46401	50711	62337	68303	60317	46857	41727	40067	42433	51964	71261	60450	46588	41072	38759	42306	73480	54098	54949	40282	41765	41747	0.058
17.356	35014	41357	45496	36295	57271	80406	60953	51263	56178	65499	64174	53333	42416	39768	39074	39455	45207	65320	68505	52195	43054	40243	45582	78423	50777	54864	41465	39461	38815	0.059
17.372	36015	45360	42043	34867	49855	82362	69567	57657	60290	64457	58623	47434	39891	38780	39361	38694	41238	58480	72301	59754	46692	42615	51161	78413	47321	51956	43428	38275	37649	0.065
17.388	37414	48956	38311	34293	43965	78076	77904	63996	63663	61255	52920	43400	39633	39709	40267	38960	39654	51263	67732	66984	52250	45771	58870	75351	44920	48827	45801	39102	37544	0.074
17.403	40383	51995	35907	34076	38987	68822	86212	70131	63614	56255	47068	41340	40231	40869	42930	40726	39171	45417	61628	69216	59676	51173	69457	69970	42449	45763	49844	39124	38192	0.093
17.419	43796	51139	34373	33627	36926	59232	90262	76661	63157	52494	44486	42271	42381	43848	47172	43274	40160	41746	55849	65401	65887	58350	82695	63231	40981	41960	52491	40482	39616	0.114
17.435	48148	47622	33791	33413	35167	50702	87317	83394	62805	48651	44296	44187	45798	48708	52873	47413	41721	40665	49539	60477	68401	67716	95138	57010	39762	39490	54069	42564	41671	0.142
17.451	51612	44326	33459	33615	34509	43782	77540	88204	62791	48054	46692	49034	52371	57127	62931	53573	44545	41139	45023	54347	66612	77119	97518	51647	38478	37768	52377	45489	44686	0.164
17.466	51632	40624	33377	32889	34224	39198	66617	90389	65586	50989	51590	56303	61765	67933	76490	66223	49984	42923	42969	49444	62984	86240	89985	47905	37250	36967	48502	49272	48322	0.164
17.482	48958	36798	33132	33098	34119	36798	56874	85385	72387	56892	60233	67307	74783	81550	88221	81361	58489	46441	44227	46299	60799	96234	80057	44613	36476	35926	45151	52966	52454	0.147
17.498	44786	34909	33123	33300	33732	35706	47568	74073	79947	65844	71379	80470	87059	91689	91195	94022	71778	52571	46881	46317	61478	100120	69084	42630	35877	35716	41241	53724	53341	0.121
17.514	41600	34158	32994	33176	33549	34965	41737	63838	83228	78106	83804	90423	90454	89080	83938	92458	87549	62851	52799	49450	67019	92500	58164	40856	35620	35358	38989	50161	50975	0.101
17.529	37911	33949	33021	32832	33769	34408	38512	54302	79769	86364	90312	87775	82686	79033	73208	80992	95489	78228	62336	56221	78045	80063	49790	40113	35502	34469	37235	46830	47476	0.077
17.545	35773	33657	33100	33037	33375	34538	36859	45616	70011	84849	83883	77155	72085	68659	61995	70879	89010	92554	77523	67886	88362	69219	44742	39222	35031	34817	36324	43232	43907	0.064
17.561	34232	33220	33037	33165	33599	34389	35798	40569	60291	74916	72736	67328	61477	57672	51023	59398	78211	93736	91799	82224	87042	58598	42108	38782	34891	34827	35490	39886	40039	0.054
17.577	33523	33427	33114	33149	33133	34233	35347	37934	51720	65545	62956	56571	50901	47134	43263	48133	67761	83866	94383	92426	78179	49347	40977	38249	34806	34941	35392	37798	38114	0.05
17.593	33510	33457	33122	33390	33420	34094	35139	36701	43827	55582	52697	46360	42544	40846	39051	41098	55655	72820	82870	88222	68823	43056	39125	37463	34829	34909	35175	36462	36573	0.05
17.608	33355	33252	33299	33102	33189	33738	34910	36234	39171	46313	43463	40112	38455	37726	36729	38368	46052	61462	71527	77049	58713	40532	38096	36879	34737	35188	35054	35582	35762	0.049
17.624	33139	33442	33232	33338	33517	33890	34727	35398	36786	40229	38960	37323	36870	36538	36279	36773	40332	50271	61449	67039	48655	38734	37399	36443	34951	34493	34838	35250	35390	0.047
17.64	33298	32756	33174	33005	33678	33789	34660	35156	36068	37728	37128	36142	36438	35965	35360	35932	38218	42343	49780	56361	41975	38100	36662	36389	34927	34908	34963	35571	35500	0.048
17.656	33420	33193	33370	33438	33465	33622	34520	35115	35333	36298	35922	35591	35606	35504	35751	35806	37033	38996	42071	46221	38762	37610	36469	35404	34583	34643	35040	35573	35546	0.049
17.671	33398	33220	33398	33356	33406	34279	34185	34685	35174	35831	35929	35538	35651	35730	35550	35616	36767	37626	39267	40756	38132	36632	36372	35367	34863	34599	34891	35335	35039	0.049
17.687	33391	33425	33201	33416	33954	33533	33961	34580	35024	35175	35472	35138	34912	34910	35433	35340	36619	36988	37353	38316	36938	36627	36072	35247	34782	34703	34752	35181	35160	0.049
17.703	33530	33531	33527	33669	33948	33846	34193	34440	34727	34801	35147	35359	35097	35282	35018	35213	36335	36569	36844	37545	36715	36351	35803	35344	35274	34760	35063	35154	34819	0.05
17.719	33377	33406	33494	33639	33801	33920	34373	34435	35085	34957	35068	34953	34725	34790	35586	35334	36028	36664	37005	37055	36581	36461	35659	35533	35263	34840	35080	35324	34888	0.049
17.734	33274	33489	33476	33242	33672	34184	34011	34574	34856	34891	34786	34905	34764	34730	34953	34781	35508	36366	36718	36513	36463	35637	35594	35676	34901	34981	35030	35381	35329	0.048
17.75	33749	33405	33635	33607	33950	33762	34386	34265	34961	34939	35076	35060	34876	35024	34779	34885	35661	36239	36618	36324	36065	35787	35731	35558	35173	34906	35159	35303	35185	0.051
17.766	33584	33578	33791	33971	34187	33925	34079	34408	34569	34853	35150	34949	34661	34818	35103	35182	35649	35658	36389	36566	35828	35696	35879	35296	35240	35089	34936	35381	35256	0.05
17.782	33151	33656	33591	34236	33936	33773	34241	34525	34447	34659	34583	34813	34935	35073	34809	35210	35736	36292	36205	35981	35886	35761	35705	35491	35491	35198	35183	35378	34900	0.047
17.798	33405	33878	33458	33618	34135	34176	34118	34565	34257	34849	34431	34744	34780	34473	34774	35085	35717	35762	35937	36242	36065	35893	35887	35835	35310	35313	34783	35446	34993	0.049
17.813	33500	33770	34000	33920	34000	33922	34462	34363	34434	34491	34516	34541	34936	35137	35122	34771	35437	35621	36068	36207	35887	35616	35786	35768	35443	35277	35346	35385	35489	0.049
17.829	33346	33422	33834	33929	34242	33921	34190	34451	34517	34672	34639	34561	34309	34943	35056	35149	35798	35645	35930	36190	35669	35764	35706	36017	35349	35363	35636	34948	35081	0.049
17.845	33520	33885	33556	33719	34218	34076	34650	34607	34664	34647	34745	34655	34741	34819	35137	35188	35457	35841	35885	36218	35565	35600	35970	35588	35613	35176	35387	35335	35608	0.05
17.861	33392	33518	34027	34094	34261	34005	34310	34696	34729	34880	34503	34360	34645	34888	35176	35026	35660	35795	35584	36231	35967	35617	35632	35662	35397	35439	35104	35661	35419	0.049
17.876	33838	33989	33916	33848	34126	33963	34831	34888	34634	34588	34874	35051	34840	34799	35158	34876	35739	36211	35825	36039	35997	35752	35887	35934	35939	35201	35606	35358	35433	0.052
17.892	34010	34214	33969	33952	34389	34508	34894	34769	34694	34818	34853	34894	35098	34859	35014	34957	35951	36140	35958	35908	35765	36010	35933	35767	35742	35585	35430	35580	35549	0.053
17.908	33634	33977	33968	34036	34277	34371	34761	34519	34723	34690	34782	34989	35280	34848	34940	35223	35963	36080	35920	36285	35964	35982	35947	35862	35625	34964	36015	35742	35467	0.05
17.924	34021	33864	34317	34759	34328	34307	34732	34675	34705	34804	35132	34800	34993	35214	35231	35231	35772	36434	36096	35615	36014	36235	36265	35379	35642	35599	35870	35629	35539	0.053
17.939	34040	34248	34267	34605	34294	34429	34695	34713	34365	34988	35112	34969	34978	35195	35240	35227	35819	35747	36252	36214	35876	36306	35886	35895	36362	35931	35777	35756	35837	0.053
17.955	33836	33922	34222	34491	34758	34926	34887	34695	34975	35085	34999	35254	35225	34770	35218	35167	36171	36270	36201	36069	36069	36157	35786	35967	35860	35378	35858	35940	35679	0.052
17.971	33892	34245	34482	34377	34910	34526	35010	35174	34629	35044	34874	35041	35163	35145	35612	35411	36084	35921	35997	36068	36112	35893	36125	36101	35843	35917	35630	35695	35570	0.052
17.987	33975	34525	34252	34395	34522	34571	34774	34879	34894	35051	35205	35178	35295	35045	35160	35321	36278	36126	36179	36500	36270	36109	35975	36012	35916	35685	35436	35889	35901	0.052
18.003	34203	34100	34511	34710	34754	34407	34900	34841	35200	35091	35436	35377	35262	35200	35126	34993	36173	36465	36439	36216	36189	35942	36376	35921	35795	35780	35983	36011	36159	0.054
18.018	34355	34524	34641	34537	34612	34895	34932	35045	35053	34995	35188	35592	35406	35408	35388	35507	36261	36279	36658	36739	35965	36036	36379	36377	36151	35880	35934	36024	36035	0.055
18.034	34372	34623	34877	34534	34897	35038	34902	34986	34833	35134	35320	35281	35308	35416	35254	35546	36351	36568	36336	36280	36227	36358	36342	36398	36146	35838	35847	35878	36164	0.055
18.05	34244	34585	34390	34978	34961	34919	35020	34885	35007	35600	35596	35565	35564	35519	35525	35541	36137	36315	35807	36470	36454	36696	36562	36447	36468	35974	36205	36141	35797	0.054
18.066	34551	34756	34517	34964	35138	35436	35500	35519	34875	35577	35275	35570	35130	35297	35609	35888	36034	36519	36254	36541	36432	36330	36351	36570	36373	35980	36112	35844	36003	0.056
18.081	34305	34713	34862	35031	34802	34928	35271	35471	35611	35299	35376	35729	35457	35861	35886	35733	36071	36687	36327	36696	36245	36750	36416	36161	36244	35933	35951	36220	36314	0.055
18.097	34831	34915	34874	34950	34933	35625	35219	35391	35262	35692	35591	35904	35858	35592	35839	35830	36465	36574	36353	36772	36846	36325	36244	36352	36534	36129	36422	36449	36403	0.058
18.113	34709	34731	35117	34963	35350	35113	35514	35584	35287	35073	35797	35771	35673	35541	36203	35661	36284	36776	36519	36529	36367	36540	36430	36317	36539	36633	36531	36686	36141	0.057
18.129	34409	34837	35149	35398	35281	35117	35610	35355	35487	35697	36015	35865	35965	36111	36257	36018	36619	36567	36611	36592	36575	36689	36623	36339	36012	36709	36327	36645	36169	0.055
18.144	34734	34963	34927	34746	35527	35185	35916	35524	35269	35615	36041	35891	35677	36033	36158	35731	36217	36790	36875	36727	36516	36736	36498	36799	36598	36228	36572	36472	36511	0.057
18.16	34910	35108	35109	35626	35344	35476	35546	35299	35691	35458	35775	35825	35738	35915	36049	35753	36441	36947	36598	36885	36538	36567	36354	36888	36783	36496	36290	36643	36160	0.058
18.176	35132	35233	35110	34739	35392	35445	35511	35552	35792	35737	36124	35763	35697	35909	36018	36080	36724	36537	36994	37045	36652	36732	37086	36826	36514	36427	36519	36518	36811	0.06
18.192	35104	35366	35249	35234	35393	35412	35570	35918	35670	35654	35801	36105	36162	36228	36523	36072	36706	36584	37071	36773	36903	37096	37055	36874	36669	36301	36432	36479	36418	0.06
18.207	34963	35280	35236	35047	35538	35321	35546	35714	35976	35812	35802	36084	35684	36265	35953	36190	36757	36985	37136	36764	36834	37356	36922	36931	36765	36972	36800	36477	36904	0.059
18.223	34685	35459	35185	35710	35517	35497	35814	35649	35746	36021	35690	36110	36142	36382	36483	36108	36512	36739	37105	36997	37303	36994	36988	36573	36961	36954	36535	36468	36730	0.057
18.239	35585	35334	35208	35399	35376	35978	35848	35600	35792	36147	36140	36012	35664	36708	36596	36701	37077	37047	37211	36617	36799	36817	37183	37007	36890	36629	36993	37190	36598	0.063
18.255	35139	35408	35512	35445	35902	35752	35699	35883	35826	35719	35945	36404	36208	36640	36491	36075	37137	36877	37021	36800	36923	36992	36781	36969	37235	37015	36797	36951	37074	0.06
18.271	34787	34966	35728	36102	36337	35725	36249	35759	36022	35944	36059	36471	36421	36430	36192	36178	36798	37268	37213	37488	37628	36989	36928	37415	37081	36931	36457	37219	36911	0.058
18.286	35022	35113	35559	35417	36302	35781	36066	35915	36263	36117	36440	36220	36239	36217	36379	36610	36968	37041	37564	37396	37115	37241	37223	37515	37130	36958	37307	37261	36899	0.059
18.302	35189	35551	35816	35319	36135	36279	36121	36179	35944	36404	36294	36458	36347	36594	36544	36695	36994	37099	37249	37149	37039	36954	37342	37213	37106	37288	37254	37045	36778	0.06
18.318	35429	35450	35735	35813	36070	36122	35768	36429	36099	36523	36290	36448	36220	36300	36748	36516	37046	37366	37451	37109	37414	37426	37374	37306	37123	37140	37003	37450	37256	0.062
18.334	35009	35616	35830	36033	36316	36027	36104	36335	36399	36222	36741	36411	36788	36679	36683	36427	37025	37476	37619	37490	37620	37672	37613	37755	37091	37357	37497	37404	37173	0.059
18.349	35423	35757	35971	36176	35969	36158	36378	36380	36387	36503	36595	36870	36335	36809	36836	36759	37240	37344	37359	37372	37434	37335	37134	37277	37051	37132	37437	37088	37557	0.062
18.365	35185	35879	36178	35868	36060	35824	36228	36381	35912	36450	36513	36381	36560	36440	36532	36525	37258	37633	37443	37016	37483	37320	37389	37805	37122	37216	37122	37541	37225	0.06
18.381	35416	36159	36168	36079	36096	36426	36031	36344	36485	36728	36662	36468	36474	37241	36990	36600	37414	37673	37219	37639	37459	37411	37446	37702	37511	37350	37409	37737	37867	0.062
18.397	35817	35596	36046	36114	36509	36426	36224	36532	36410	36382	36756	36596	36829	36855	36907	36602	37528	37599	37707	37364	37740	37488	37505	37480	37218	37297	37480	37824	37567	0.064
18.412	35593	35682	36108	36146	36520	36243	36394	36401	36612	36393	36577	37043	36611	37091	37001	36760	37394	37920	38051	37921	37632	37757	37768	37559	37490	37347	37661	37783	37676	0.063
18.428	35953	35805	36104	36645	36209	36341	36476	36359	36123	36701	36866	36670	36716	37019	36972	36972	37754	37462	37491	37857	37684	37708	37934	37517	37382	37194	37404	37837	37772	0.065
18.444	35707	36522	36245	36706	36604	36474	36602	36711	36430	36970	36542	36814	36932	36825	37172	36890	37387	37605	37594	37426	38239	37847	37730	38248	37650	37646	37977	37477	37735	0.063
18.46	35996	36345	36359	36357	36505	36365	36821	36573	37010	36307	36709	36926	37106	37146	36586	36924	37602	37748	37973	37691	38018	38145	38060	38050	37755	37438	37996	38284	38052	0.065
18.476	36403	36396	36800	36812	37020	36961	36679	36473	37025	36745	36800	37129	36869	37051	37273	37386	37582	38030	37769	37906	38023	37895	37795	37972	37808	37705	37864	38171	38587	0.068
18.491	36129	36125	36822	36886	37218	36875	36804	37087	36854	36678	37237	37447	37218	37038	37048	37120	37675	37991	38294	38408	37820	37672	37999	37787	37775	38078	38052	38224	38035	0.066
18.507	36413	36762	37011	36904	36936	36893	36702	36837	36992	36861	37129	37175	37127	37472	37143	37387	37808	38149	38125	38014	37994	37819	38279	38079	38093	38422	38116	38523	37928	0.068
18.523	36385	36470	37142	37222	37142	37064	37069	37486	37146	37339	37529	37526	37197	37427	37368	37154	38177	37828	37779	38157	38035	37684	38117	38363	38281	37758	38212	38322	38442	0.068
18.539	36834	36839	37049	37791	37247	36786	37559	37064	37247	37259	37704	37673	37650	37333	37403	37520	37925	37675	38126	38501	38026	37937	38302	37856	38497	38210	38072	38401	38063	0.071
18.554	36640	36907	37325	38034	37655	37236	37375	37594	37199	37194	38246	38007	38271	37798	37991	37534	37941	37879	38429	37856	38194	38147	38218	38070	38215	38407	38141	38688	38891	0.069
18.57	36834	37287	37697	38445	37744	37337	37234	37333	37585	37740	38209	38183	38044	38080	37753	37531	37938	38335	38508	37986	38315	38074	37900	38150	38592	38822	38979	39003	38911	0.071
18.586	37072	37426	37829	38512	38205	37465	37823	37494	38265	38060	38705	39318	38473	38360	38190	37805	38351	38398	38103	38626	38052	38736	38337	38267	38688	38258	38798	38494	38584	0.072
18.602	37550	37570	37961	38926	38536	38193	38100	37935	37981	38976	39545	39828	39854	38622	38701	37877	38228	38200	38358	38399	38164	38567	38442	38564	38972	38781	38824	38868	38978	0.075
18.617	38240	37928	38320	38933	38970	38770	38317	38837	39222	39447	40405	40371	40379	39081	38738	38012	38472	38594	38492	38651	38350	38630	38530	38802	39295	39061	39035	39366	39364	0.079
18.633	38538	38289	39443	39454	39678	39083	39119	39325	39645	40736	40834	41067	40895	39396	38482	38187	38695	38649	38730	38586	38757	38626	38368	39266	39673	39373	39036	39713	39243	0.081
18.649	39714	39165	40391	40012	40489	40208	40510	40671	40788	41237	41647	41897	41469	39340	38880	38789	38874	38997	38890	39034	38276	38823	38688	39187	39464	39484	38934	39716	39577	0.089
18.665	40856	40421	41491	41142	41218	42269	41671	41704	42076	42020	42129	42160	41528	39736	39261	39018	39304	38971	39208	38824	38898	38651	38943	39609	39418	39790	38957	40005	39577	0.096
18.681	41599	41900	42447	42257	42351	42619	42664	42370	42609	42594	42417	42163	41473	39620	39068	38506	39365	39505	39549	38994	38963	38646	39195	39590	40062	40260	39622	39787	39542	0.101
18.696	42216	43019	42707	42350	42605	43019	42890	42486	42645	42248	41958	41661	40428	39404	39418	38865	39287	39519	39641	39483	38909	38889	39232	39852	39482	40130	39626	39538	39690	0.104
18.712	41434	42735	42712	42433	42585	42941	42663	42597	42503	42110	41602	41286	40582	39704	39131	38810	39567	39795	40106	39644	39243	38866	39530	39925	39312	39788	39472	39400	39841	0.1
18.728	40905	42047	41382	41704	41468	41728	42477	41809	42090	41231	41356	40649	40543	38790	39175	38631	39424	40079	39885	39716	39471	39298	39469	39325	39729	40017	39620	39520	40048	0.096
18.744	39912	41703	40668	41083	40302	41018	41127	41560	40671	40169	40454	39764	39440	39262	39077	38769	39331	39160	40075	40184	40073	39652	40234	40055	39206	39250	39995	39814	39954	0.09
18.759	39821	40367	39616	40221	39917	40051	40816	40568	40331	39841	39325	39275	39635	39348	39323	38608	39685	39888	39909	40530	40207	39807	40363	40207	39365	39607	39908	39926	39966	0.089
18.775	39109	39650	38568	39314	38846	39475	39974	40174	39474	38798	38802	39047	39488	39198	39386	38842	39452	39322	39776	40674	40589	40372	40662	39687	39436	39179	40659	40279	39828	0.085
18.791	39384	39167	37954	38557	38513	38655	39472	39625	39041	38660	38704	39081	39417	39435	39709	39175	39650	39521	39773	40031	40491	40282	40359	39767	39180	39567	40555	40164	40054	0.087
18.807	39152	38653	37682	38410	38609	38817	38933	39148	39274	38567	38486	38986	39582	39472	39332	38877	39674	39171	39345	40484	40661	40559	40322	40072	39567	39077	40207	40526	40708	0.085
18.822	38494	38285	37596	38499	38609	38334	39052	38792	38659	38731	38720	38558	39553	39235	39082	39088	39710	40191	39379	39460	40082	40697	40549	39737	39872	38936	39861	40644	40966	0.081
18.838	38979	37828	37601	37968	38588	38290	38693	38574	38868	38584	38897	39093	39336	38656	39074	38868	39500	39783	39623	39748	39824	40028	40536	39892	40010	39329	40360	40997	40524	0.084
18.854	38468	37994	37780	37979	38663	38897	38809	38577	38660	38696	39296	39549	38536	38859	38463	38851	39575	39745	39787	39897	39561	40065	40074	39878	40088	39456	39367	40579	40760	0.081
18.87	37977	37918	37993	37946	38687	39016	39122	38937	38669	38406	39213	39437	38830	38906	38852	38641	39517	39852	39603	39692	39588	40296	40286	40285	40351	39379	39550	40677	40476	0.078
18.885	37957	37666	37517	38235	38617	38730	38785	39201	38604	39037	39117	39158	38768	38601	38696	38797	38963	40019	39515	39738	39740	40168	40226	39950	40058	39270	39328	40228	40272	0.078
18.901	37792	37826	37541	38156	38502	38531	39222	39191	39172	39526	39307	39316	38872	38641	38845	38375	39513	40507	39901	39744	40006	39849	39973	39728	39687	39238	39375	39813	40144	0.077
18.917	37964	37796	37716	37895	37878	38559	38785	39099	39450	39367	39630	39081	38683	38669	38497	38603	39356	39589	40174	39804	39646	40089	40006	40121	39689	39496	39431	40129	39912	0.078
18.933	37853	37955	38213	38244	38388	38700	39278	38991	39398	39593	39153	38992	38498	38674	38971	38460	39559	39928	40062	39724	40017	39904	40293	40298	39404	39373	39378	39764	39752	0.077
18.949	37808	38113	37711	37948	38458	38127	38826	39465	39317	39525	38884	38748	38819	38725	39019	38460	39696	39666	40022	40030	40034	40028	40203	40252	39890	39397	39392	39629	39438	0.077
18.964	38300	37834	38149	38020	38020	38683	38866	38505	39199	39238	39012	38714	38929	38834	39166	38884	39632	39507	40093	40289	40566	40390	40599	40270	40141	39568	39302	39982	39863	0.08
18.98	37611	38012	37791	38088	37926	38576	38800	38934	38734	39376	39206	38669	38857	38895	39136	38455	39604	40151	40227	40478	40466	40636	40362	40280	39361	39154	39743	39686	39538	0.075
18.996	37978	37566	37944	38270	38380	38556	38617	38973	38839	38756	38758	38631	38746	38777	39098	38776	39196	39894	39839	40365	40475	40459	40296	40218	39937	39213	39628	39735	39589	0.078
19.012	37877	38193	38128	38332	38743	38365	38921	38887	39129	38871	38572	38803	38693	38982	39057	38945	39529	39747	39921	40444	40612	40270	40354	40263	39819	39956	40116	39810	40151	0.077
19.027	37687	37988	38186	37873	38591	38393	38534	38876	39053	39018	38970	38865	39057	39011	39101	38972	39365	39827	39667	40313	40366	40424	40139	40171	40067	39795	39759	39863	39645	0.076
19.043	37917	38308	38392	38135	38420	38551	38448	38886	38454	39060	39125	39166	39186	38696	39288	38942	39637	40112	40050	40079	40384	40363	39960	40412	39597	39461	39542	39926	40101	0.077
19.059	38300	38018	38472	38708	38467	38369	39047	38841	39365	39171	38386	39013	39164	39117	39755	39561	39550	39877	39968	40467	40323	40094	40467	39594	40020	39685	40236	39619	39846	0.08
19.075	38297	37819	38239	38615	38602	38721	38755	39044	38865	38989	38907	39054	39145	39201	39369	39153	39639	39902	39967	40019	40221	40192	39841	39967	39854	39694	39754	40070	39705	0.08
19.09	37968	38210	38457	38692	38643	38850	38641	39007	39120	39024	39361	39229	39293	39513	39574	38934	39542	40119	40121	40177	40092	40019	40407	40218	40033	39967	39842	39881	39977	0.078
19.106	37807	38377	38338	38638	38670	38623	38878	38842	39238	38968	39418	39316	39270	38822	39102	38970	39424	40155	39783	40386	40155	40142	39738	40301	40030	39796	39968	40043	39589	0.077
19.122	38407	38751	38405	38734	38781	38774	38596	38903	39106	39192	39160	39259	39212	39653	39559	39194	39796	40061	40201	40073	40722	40099	40506	40062	39796	40245	40322	40472	40133	0.08
19.138	38306	38705	38499	38685	38615	38819	38971	38848	39007	38756	39230	39448	39090	39566	39181	39415	39859	39868	40293	40233	40417	40064	40143	40321	40214	40057	40269	40110	40317	0.08
19.154	38603	38615	38862	39460	38830	38850	39102	39070	39062	39527	39186	39125	39134	39765	39815	38994	39690	40110	40273	40077	40574	40079	40381	40200	40123	39939	40044	39986	40456	0.082
19.169	38259	38557	38357	39212	39117	39306	39072	39306	39239	39466	39506	39341	39067	39466	39617	39127	39770	40343	39946	40489	40229	40290	40033	40269	40251	40323	40515	40125	40244	0.08
19.185	38488	38515	38675	38872	38593	38817	39260	39319	39376	38881	39434	39668	39578	39560	39624	39437	40071	40332	40131	40409	40273	40034	40187	40409	40346	40006	40042	40218	40095	0.081
19.201	38595	38791	38779	38845	38980	39047	39351	39020	39255	38896	39385	39725	39470	39638	39637	39548	40137	40393	40092	40372	40816	40474	40518	40550	40469	40323	40394	40240	40562	0.082
19.217	38576	38793	38682	39102	39079	39375	39341	39198	39853	39407	39614	39734	39753	39721	39629	39257	39855	40269	40320	40124	40449	40213	40631	40247	40301	40198	40300	40264	40602	0.082
19.232	38605	38777	38854	39043	39028	39171	39701	39209	39342	39576	39814	39224	39684	39547	39552	39646	39977	40400	40412	40501	40318	40718	40648	40774	40180	40388	40381	40467	40513	0.082
19.248	38783	38688	38874	39133	38932	39031	39476	39407	39330	39160	39249	39618	39618	39713	40248	39535	40426	40631	40792	40648	40043	40626	40449	40837	40526	40617	40640	40504	40514	0.083
19.264	38804	38868	39257	38939	38894	39076	39697	39542	39228	39870	39277	39601	39708	39508	40220	39443	40099	40723	40127	40225	40790	40445	40593	40213	40445	40845	40605	40533	40355	0.083
19.28	38860	38933	39322	39373	39373	39696	39358	39469	39286	39813	39772	39828	39963	40038	39918	39632	40297	40015	40398	40463	40699	40510	40734	40557	40566	40395	40390	40748	40452	0.083
19.295	38518	39139	38918	38820	39016	39602	39634	39364	39950	39536	39965	39512	39664	40316	40154	39528	40341	40581	40489	40418	40648	40638	41090	40689	40545	40790	40436	40944	40603	0.081
19.311	38852	38950	39433	38967	39197	39314	39962	39519	39659	39937	39647	39557	39782	40191	40040	39901	40360	40366	40567	40238	40995	40678	40604	40997	40748	40670	40207	40821	40574	0.083
19.327	39257	38892	39225	39331	39549	39483	39659	39876	39406	40027	39718	39760	39880	40035	39976	39773	40124	40862	40565	40481	40934	40727	40940	40734	41195	41180	40481	41097	40525	0.086
19.343	38754	39340	39110	39065	39352	39155	39646	39707	39854	39455	39992	39797	40138	40335	39991	39924	40221	41030	40897	40564	40654	40582	40648	40619	40953	40879	41262	41087	40752	0.083
19.359	38953	39233	39051	39388	39674	39291	39642	40064	39850	39517	39881	40171	40120	39880	40355	39915	40647	40965	40789	41356	40525	40799	40891	41029	40879	41257	40753	41021	40608	0.084
19.374	39104	39394	39197	39601	39819	39180	39736	40190	39539	40138	39643	39837	40107	39613	40120	39995	40595	40732	40427	40765	40667	40888	40741	40837	40802	40868	40931	40779	40881	0.085
19.39	39323	39509	39550	39544	39561	39782	39770	39765	39841	40305	39882	40006	40192	40403	40492	40381	40371	40666	40795	40790	40935	41191	41026	41004	40841	40846	40773	40870	41076	0.086
19.406	39164	39577	39543	39476	39719	39720	40192	39778	40035	39773	39787	40294	39947	40287	40309	39923	40538	40904	41269	40815	40970	41389	40591	40973	41387	41264	40546	41034	41176	0.085
19.422	38994	39486	39487	39486	39966	39911	39826	40116	40077	39870	40269	39876	40411	40194	40433	40332	40541	40580	41335	41501	41166	41283	41238	41115	41220	40860	41167	41395	41413	0.084
19.437	39168	39782	40023	39653	39581	39625	40100	39773	39877	40563	40500	40130	40283	40701	40343	40154	40400	41013	41112	41114	40924	41306	41072	41218	41058	41163	41086	41449	41234	0.085
19.453	39160	39711	39484	39769	39877	39608	40204	40176	39925	40192	40477	40305	40319	40870	40539	39997	40869	41073	41124	41670	40867	41390	40983	41772	41574	41264	40804	41098	41089	0.085
19.469	39241	39760	39726	39854	39989	40024	40369	40076	40093	39817	40248	40343	40206	40654	40703	40142	40831	40690	41087	41329	41166	41605	40863	41613	41290	41111	41096	41063	40759	0.086
19.485	39551	39589	39509	40014	40301	40129	39978	40250	40325	40245	40284	40082	40312	40686	40498	40215	40697	41358	41172	41760	41280	41446	41408	41265	41411	41171	41110	41405	41223	0.088
19.5	39417	39467	39659	39818	39907	39970	40091	40030	40299	40075	40187	40608	40375	40603	40791	40761	41117	40847	41390	41249	41615	41520	41477	41533	41125	41158	41413	41676	41339	0.087
19.516	39499	39808	39783	39945	40407	39850	39899	40521	40494	40372	40064	40526	40398	40572	40552	40604	40785	41133	41011	41543	41387	41228	41588	41799	41399	41152	41235	41333	41670	0.087
19.532	39908	40210	39789	40033	39745	40272	40049	40609	40296	40328	40535	40636	40997	40821	40547	40647	41297	41402	41538	41170	41389	41223	41165	41577	41459	41619	41639	41096	41639	0.09
19.548	40103	39905	39796	40069	40382	40014	40135	40689	40608	40398	40535	40965	40910	40551	40910	40348	41282	41360	41182	41446	41360	41295	42087	41830	41297	41269	41353	41398	41429	0.091
19.563	39581	39716	40004	40150	40330	40344	39792	40434	40835	40343	40415	40820	40714	40658	40664	40389	41362	41830	41337	41747	41365	41416	41713	41518	41433	41195	41569	41547	41584	0.088
19.579	40107	39838	40354	40167	40516	40428	40058	40395	40589	40545	40764	40689	40899	41254	41096	40613	41497	41752	41582	41673	41882	41746	41712	41356	41267	41435	41792	41729	41773	0.091
19.595	39893	39999	39846	40405	40463	40092	40656	40801	40660	40559	40837	40741	41033	40636	41136	40816	41249	41799	41824	41437	41646	41573	42000	41829	41780	41733	41535	41815	41456	0.09
19.611	39977	40124	40457	40143	40432	40315	40718	40506	40404	40643	40541	41124	40899	40670	41743	40719	41345	41829	41762	41754	41720	41901	41942	41838	41828	41684	41398	41602	42064	0.09
19.627	40119	40427	40417	40656	40434	40411	40606	40926	40776	40664	40591	41087	41082	41185	41482	40847	41202	41535	41984	42055	41882	41775	41554	41866	41830	42182	41762	41976	42082	0.091
19.642	39951	40198	40390	41022	40794	40742	40730	40826	41116	40880	40805	41492	41288	41060	40731	41164	41464	41519	41858	41999	41823	41696	41642	41521	41710	41772	41815	42044	41886	0.09
19.658	39686	40063	40910	40415	40479	40648	41142	40817	40798	41163	40845	41003	41096	41179	41180	41158	41711	41842	41897	42089	42034	42197	41957	42357	42005	41751	41988	41916	41867	0.089
19.674	40234	40328	40555	40463	40700	40362	40951	40868	40631	41157	40969	41090	41199	41182	41297	41505	41448	41047	42059	42373	42370	42163	41843	42022	42055	41709	41831	41869	41888	0.092
19.69	40595	40398	40562	40456	41030	40288	40661	41087	40882	40985	40991	41142	41085	41079	41191	41119	41743	41696	41561	42244	41737	41890	41851	42343	42071	42182	41793	41872	42193	0.094
19.705	40192	40468	40958	40982	40967	40756	40259	40572	41150	41218	41097	41484	41069	41548	41255	41274	41752	42253	42029	42432	42280	42160	42214	42251	42474	42126	42442	42144	42054	0.092
19.721	40135	40070	40878	41244	40753	40940	41027	41108	41014	41140	41366	41184	41278	41546	41671	41345	41677	42119	42078	41876	41827	42367	42369	42003	42532	42290	42265	42432	42454	0.091
19.737	40415	40502	40856	41028	40689	41313	41212	41136	41017	41339	41216	41090	41505	41378	41738	41323	41871	42043	42168	42452	42073	42188	42192	42307	42406	42077	42426	42226	42159	0.093
19.753	40180	40323	41005	40985	40779	41073	40780	40946	41225	41074	41411	41329	41287	41313	41949	41179	41788	42191	41958	42064	42660	41725	42270	42296	42046	42016	42447	42268	42170	0.092
19.768	40705	40397	40265	41062	40805	41129	40990	41217	41265	41344	41558	41526	41327	41645	41193	41721	41815	42205	42322	42470	42140	41953	42352	42338	42834	42351	42447	42317	41969	0.095
19.784	40890	40470	40724	41028	41240	40948	41268	41190	41446	40987	41576	41721	41414	41618	41977	41546	42232	42202	42292	42073	42033	42259	42687	42491	42573	42676	42412	42307	42799	0.096
19.8	40581	40604	40970	40966	40800	41011	41186	41368	41565	41362	41560	41231	41529	41871	41933	41204	42046	42305	42343	42330	42314	42297	42496	42373	42142	42475	42502	42531	42026	0.094
19.816	40799	40609	41039	41237	41012	41070	41185	41428	41302	41576	41559	41291	41413	41853	41891	41464	41835	42401	42579	42416	42516	42385	42458	42602	42781	42191	42816	42521	42552	0.096
19.832	40554	40773	41009	41322	41102	41444	41668	41341	41396	41572	41874	41796	41598	42093	41701	41925	42002	42654	42644	42353	42581	42985	42521	42634	42683	42687	42628	42661	42339	0.094
19.847	40633	40959	41031	41404	41351	41400	41675	41968	41530	41524	41416	41771	41971	42207	41954	41736	41869	42294	42210	42666	42618	42420	42536	42540	42775	42851	42706	43025	42426	0.095
19.863	40587	40953	41007	41312	41688	40842	41385	41571	41636	41494	41846	41737	41839	42111	42310	41985	42244	42390	43009	42836	42507	42732	42553	42763	42666	42658	42647	43168	42435	0.094
19.879	40883	41259	41198	41479	41624	41481	41723	41363	41506	41825	41967	41991	41892	42306	42750	41994	42409	42886	42615	42687	42185	42546	42519	42554	43080	43141	42630	43065	42575	0.096
19.895	41194	41186	41337	41570	41732	41674	41511	41634	41582	41810	41923	41987	41928	42332	42354	41771	42288	42919	42912	42670	42395	42684	42971	42790	42859	43033	42576	43021	42666	0.098
19.91	40935	41361	41477	41758	41325	41470	41837	41569	41890	41849	41630	42416	42320	42207	42633	41822	42942	42541	42342	42769	42352	42740	42807	42823	43161	42967	42894	42900	43130	0.096
19.926	41184	41368	41644	42478	41955	41418	41426	41911	41468	41487	42465	41772	42229	42336	42448	42258	42806	42674	43073	42601	43073	42671	42842	43049	42842	43397	43046	42637	42779	0.098
19.942	41067	41431	42036	42836	42170	42211	41628	42146	41867	41635	42227	42170	42334	42533	42860	42421	43128	42849	42991	42752	43034	42810	42862	42609	43812	43144	42738	43352	43000	0.097
19.958	41258	41482	42368	43301	42700	41749	41790	41776	41869	41908	42169	42139	42565	42884	43341	42569	42680	43072	42953	42930	43072	42907	43069	43495	43577	43277	42551	43048	42709	0.098
19.973	41632	41648	42943	43412	42744	42083	42050	41692	41961	42192	42138	42360	42555	43191	44049	42985	43292	42780	43175	43064	42965	42926	42682	43000	43898	43859	43576	42743	43435	0.101
19.989	41220	41672	43136	43672	42799	42273	41850	42039	42042	41839	42415	42460	42715	43605	44656	42936	43483	43422	43132	43036	43407	42430	42727	43040	44397	44230	43129	43562	43289	0.098
20.005	41424	42018	43742	43355	43210	42056	41857	41879	41833	42191	41965	42603	43675	44364	45219	43855	43982	43590	42855	43128	42774	43195	43290	43302	45184	44336	43722	43298	43458	0.1
20.021	41213	42460	43643	43453	43655	42684	42269	42223	42262	42483	42413	42839	43849	44880	45997	44568	44254	43487	43569	43492	43334	43107	43278	43484	44729	45071	43728	43457	43211	0.098
20.037	41680	42405	43288	43212	43511	42862	42135	42443	42417	42334	42433	42686	44118	46008	46146	45186	45006	43440	43207	43038	43903	43116	43568	43819	45212	44845	43766	43858	43432	0.101
20.052	41770	42828	42844	42799	44222	43076	42486	42307	42784	42396	42685	43188	45503	45668	45889	45690	45950	43672	43525	43439	43599	43131	43264	44206	45223	44981	44298	43690	43477	0.102
20.068	41565	43360	42836	42881	44261	43260	42683	42543	42618	42252	43127	44044	45774	46004	45615	45715	46489	44254	43443	43658	43187	43642	43640	44076	44823	44551	44424	44197	44048	0.1
20.084	42138	43398	42601	42213	43593	43498	43027	42420	42596	42808	43721	44869	46129	45698	44923	45362	46204	44571	43509	43564	43278	43577	43740	44833	44657	44334	44801	43869	43900	0.104
20.1	42322	43540	42127	42305	43056	43938	43189	42844	42765	43084	44081	45715	46101	45146	44809	44358	46162	45229	44188	43611	43408	43352	43681	45195	44644	44270	44920	44154	43904	0.105
20.115	42949	43452	42038	42406	43311	44162	43769	43341	43168	43900	44830	46722	45364	44788	43714	44547	45442	46373	44591	43828	43569	43727	43976	45517	43974	44098	45178	44033	44360	0.109
20.131	43710	43120	41825	42479	42700	44704	43987	43706	43594	44023	45824	46624	45049	44284	43897	43824	45121	47177	44514	44005	44040	43693	44197	45089	43974	44001	45755	44669	44329	0.114
20.147	43825	43216	42272	41989	42680	44430	44449	43943	43587	44797	46157	46318	44378	43743	43669	43918	44721	47441	45600	44173	44186	43859	44728	45402	44378	43966	45464	44747	44974	0.115
20.163	43797	42495	41813	42176	42726	44177	45091	44600	44349	45175	46512	45349	43850	43612	43456	43265	44336	46952	46246	44963	44523	44405	45403	45478	44365	43963	44741	45208	45301	0.114
20.178	43639	42486	42119	42772	42428	43707	45055	44827	45432	45895	46711	45385	44155	43297	43692	43369	43760	46633	47424	45571	44432	44709	45990	45145	44155	44059	44392	45579	45717	0.113
20.194	43056	42151	41932	42438	42325	43543	44726	45529	45534	46157	45838	44729	43381	43012	43267	42846	43699	45907	47616	46115	45252	45452	46514	45015	44122	44103	44177	45549	45536	0.11
20.21	43051	42436	42496	42829	42712	43623	45119	45898	45900	46086	45334	44315	43806	43207	43461	43018	43391	45701	47457	46860	45678	45562	46333	44296	44524	43757	44187	45504	45383	0.11
20.226	42726	42322	42147	42627	42265	43163	44367	45478	46294	45918	45301	43776	43117	43066	43276	43046	43374	45071	47115	47179	46839	46510	46966	43955	44179	43925	43865	45274	45331	0.108
20.241	42407	42034	42135	42301	42981	42736	44124	45525	45820	45799	44616	43633	42931	43301	42874	42973	43789	44464	46513	47726	47181	47158	46255	44550	44094	44451	44046	44836	45214	0.106
20.257	42692	42775	42522	42706	42791	42964	43875	44903	44946	44834	44022	43290	43103	43151	43285	43082	43246	44277	45775	47799	47266	47549	46039	44423	44064	43894	44213	44868	44694	0.108
20.273	42405	42202	42448	42568	42556	42648	43027	44680	44935	44104	43435	43558	43040	43129	43806	43305	43578	44225	45371	46935	46959	46776	46103	44465	44309	44157	44014	44737	44300	0.106
20.289	42345	42343	42487	42762	42717	42877	43383	44282	44386	43661	43686	43722	43254	43433	43476	43464	43162	44103	44833	46665	46954	46712	45314	44534	44302	44148	44453	44374	44621	0.105
20.305	42627	42612	43138	42640	43026	42962	43296	43884	43642	44051	43527	43095	42880	43653	43424	43062	43894	44210	44883	45779	46253	46173	45256	44332	44025	44315	44259	44523	44539	0.107
20.32	42628	42333	42419	43049	42565	43007	43526	43636	43721	43679	43476	43554	43008	43683	43524	43088	43928	44411	44686	45660	45864	45528	44509	43948	44316	44362	44203	44314	44505	0.107
20.336	42386	42366	42515	42946	42967	42975	43225	43317	43751	43329	43442	43108	43407	43272	43679	43154	43622	43859	44255	44610	45065	45274	44388	44553	44344	44395	44348	44049	44243	0.106
20.352	42386	42483	42893	42920	42776	43034	43097	43529	43728	43358	43391	43365	43467	43773	43759	43143	44181	43900	44218	44481	45063	44993	44790	44222	44239	44086	44505	44181	44573	0.106
20.368	42447	42375	42885	43174	42773	43287	43054	43532	43355	43733	43564	43336	43227	43430	43629	43386	43761	44032	44456	44633	44832	44882	44658	44177	44689	44393	44717	44516	44203	0.106
20.383	42687	42854	43064	43095	43036	43119	43401	42948	43381	43716	43288	43479	43463	43893	43505	43330	43734	44651	44201	44752	44771	44656	44501	44513	44477	44443	44033	44746	43976	0.107
20.399	42618	43119	43035	42884	43097	43536	43249	43129	43376	43356	43554	43201	43309	43861	43306	43143	43323	44683	44636	44389	44802	44590	44335	44666	44196	44354	44645	44424	44883	0.107
20.415	42466	42925	43120	42488	43382	43336	43410	43566	43490	43103	43781	43649	43566	43777	44051	43329	43414	44384	44756	44481	44658	44296	44483	44771	44690	44682	44539	44635	44516	0.106
20.431	42805	43021	42868	42926	42981	42840	43445	43512	43554	43380	43890	43414	43436	43772	43810	43679	44006	44688	44584	44589	44714	44280	44390	44582	44330	44423	44903	44575	44385	0.108
20.446	42949	42791	42897	43160	43398	43394	43754	43540	43388	43575	43690	44035	43585	43599	43830	43319	43950	44430	44628	44555	45028	44449	44667	44813	44727	44793	44565	44536	44729	0.109
20.462	42354	42827	42869	43467	43114	43456	43564	43493	43596	43490	43747	43588	43739	43465	43999	43611	44289	44056	44544	44717	44781	44823	44545	44222	44656	44769	44426	45005	44911	0.105
20.478	43295	42916	43027	43569	43354	43236	43298	43405	43537	43664	43813	44107	43475	43880	43856	43632	44121	44225	44392	44597	44563	44594	44826	44852	44975	44771	44702	44777	44574	0.111
20.494	43067	43233	43028	43028	43041	43578	43593	43694	43732	43765	43464	44064	43538	44153	44000	43893	43992	44350	44430	44857	44826	44715	45287	45099	45000	45011	44600	44557	44560	0.11
20.51	42920	43102	43414	43158	43514	43405	43471	43628	43403	43756	43363	44011	43740	43626	43947	43570	44567	44323	44521	44347	44964	44467	44779	44733	44769	44588	44930	44746	45051	0.109
20.525	43106	43531	43157	43229	43383	43638	43669	43640	44016	43357	43668	44250	44192	44056	44371	43648	44176	44618	44358	44638	44594	44947	44531	44851	44624	44813	45249	45034	44955	0.11
20.541	42734	43278	43238	43907	43598	43522	43588	43763	43828	44129	43842	44064	43732	43774	44168	44260	44065	44481	44573	44683	44766	44992	44621	44552	44971	44885	44821	44989	44844	0.108
20.557	42914	43398	43274	43369	43754	43842	43965	43821	43893	43894	43687	43982	43833	44335	44235	43878	44260	44843	44997	44888	44750	45270	44937	45051	45054	45422	44719	45329	45139	0.109
20.573	43211	43701	43267	43421	43766	43704	43713	43746	43965	43706	44045	43830	43811	44410	44386	43790	44424	44564	44674	45201	44961	45066	44963	44766	45116	44905	45491	45266	44703	0.111
20.588	42906	43080	43377	43699	43667	43708	43925	44005	43897	43698	44253	43951	44104	43850	44447	43989	44776	44982	45116	44596	45190	45130	44736	45288	44735	45051	45108	45071	45681	0.109
20.604	43519	43374	43507	43860	44013	43335	43740	44122	44153	43817	44020	44145	44439	44174	44039	43992	44396	44794	45031	45178	44841	45288	44646	45330	44958	45219	45328	45388	45176	0.113
20.62	43490	43316	43577	43731	43372	43821	44356	43858	44235	43929	44029	44327	44233	44117	44352	43899	44533	44878	44929	45261	45050	44928	44874	45160	45001	45338	45218	45312	45443	0.113
20.636	43069	43409	43459	43748	44100	43986	43948	44037	43904	44023	44236	44309	44703	44551	44663	44293	44378	44783	44916	45220	44856	44994	45203	44861	45028	44945	45001	45281	45627	0.11
20.651	43241	43357	43723	44136	43550	43660	44158	43894	44233	44011	44014	44423	44483	44702	44447	43713	44705	45331	45143	45106	44965	44997	45483	45510	45390	45356	45499	45016	45189	0.111
20.667	43694	43589	43472	43881	43570	43673	44176	44224	44388	43732	44094	44165	44403	44688	44814	44263	44783	45091	45430	45128	45425	45189	45212	45038	45301	44850	45673	45262	45339	0.114
20.683	43309	43378	43792	43965	44203	43903	44447	44163	44231	44358	44190	44351	44087	44308	44535	44266	44492	45335	44895	45439	44977	45230	45246	45204	45333	45066	45261	45548	45115	0.111
20.699	43191	43643	43320	44162	44350	44002	44391	44607	44376	44127	44733	44311	44497	44557	44743	44172	44690	45017	45370	45586	45145	45114	45664	45596	45778	45658	45493	45492	45240	0.111
20.715	43346	43849	43874	44223	44200	44323	44657	44419	44519	44843	44490	44461	44456	44627	44681	44466	44547	45036	44816	45391	45181	45019	45191	45151	45698	45253	45512	45444	45209	0.112
20.73	43891	43546	43665	43963	44139	43882	44250	44619	44357	44432	44708	44740	44474	44879	44726	44575	44518	45502	45430	45399	45240	45167	45925	45361	45470	45968	45524	45577	45006	0.115
20.746	43457	43746	43925	44298	44326	44350	44602	44629	44213	44231	44190	44564	44536	44753	44917	44651	44682	45508	45556	45106	45399	45615	45437	45314	45622	45409	45787	45940	45284	0.112
20.762	43954	43621	44432	44031	44367	44341	44497	44399	44712	44652	44461	44691	44673	44916	44870	44740	44765	45210	45317	45458	45867	45619	45569	45535	45852	45978	45811	45855	45523	0.115
20.778	43726	43659	44145	43840	44407	44605	44863	44383	44575	44737	44774	44637	44650	45040	44636	44493	45378	45347	45555	45388	45010	45494	45851	45869	45704	45648	45357	45962	45762	0.114
20.793	43986	44281	43964	44524	44379	44469	44514	44561	44766	44936	44470	44875	45115	45071	45226	44847	44981	45426	45558	45866	45607	45765	45873	45666	45780	45957	45892	45837	45726	0.116
20.809	43647	43974	44063	44289	44514	44476	44337	44344	44655	44470	45017	44656	44906	45076	45598	44461	44786	45536	45654	45573	45587	45353	45731	45637	45577	45733	45495	45723	45640	0.114
20.825	44013	43992	44021	44453	44300	44498	44672	44892	44921	44761	44672	44831	45020	44586	45334	44801	45214	45776	45698	45465	45947	45900	45909	45888	45907	45849	45900	45930	45919	0.116
20.841	44114	44424	44576	44065	44333	44799	44927	44726	44765	44634	44599	45100	44793	45089	45080	44926	45284	46064	45943	45712	45489	45789	46013	45764	46188	46119	45973	46138	45912	0.116
20.856	44257	44085	44280	44267	44574	44746	44420	44498	44981	44984	45365	44582	44994	45331	45324	44954	45239	45136	45526	45501	45719	46162	45938	45856	46161	46098	45793	45880	46053	0.117
20.872	43756	44013	44660	44518	44421	44473	44793	44681	44423	44911	45045	44633	45008	45456	45194	44745	45355	45598	45778	45414	45560	45733	45737	45928	46048	46105	45836	46292	46268	0.114
20.888	43990	44162	44498	44641	44919	44678	44815	44774	44838	44906	45141	44955	45412	45082	45291	45013	45377	45359	45849	45583	45657	45677	45990	45981	46114	45985	46346	46426	45965	0.116
20.904	44346	44306	44541	44501	44671	44825	44914	44943	44956	44920	44820	45093	45649	45121	45072	44640	45260	45892	45683	45977	45959	46055	45862	46531	46418	45621	45967	46077	46121	0.118
20.919	43895	44317	44292	45046	44988	45090	44649	45616	44666	45117	45595	45107	44913	45019	45136	45016	44994	45822	45881	45985	45773	46169	45876	46282	46023	46255	46267	46323	46312	0.115
20.935	44638	44556	44304	44676	44900	45076	44706	44631	45124	45221	45088	45328	45159	45651	45651	44705	45569	45520	45601	46383	45918	45825	46216	46071	46308	46218	46248	46432	46285	0.12
20.951	44262	44759	44239	44648	44913	45153	45004	45268	45018	45002	45233	45165	45134	45537	45364	44864	45385	46020	46012	45753	45956	46117	46101	45957	46312	46475	46818	46040	46487	0.117
20.967	44204	44552	44537	44744	44876	45349	45251	44776	44963	44839	44881	45173	45208	45380	45277	45077	45720	46249	46463	45770	46306	46058	46309	45945	46204	46578	46137	46490	46259	0.117
20.983	44402	44442	44600	44801	45232	45119	45179	44654	44940	45188	45129	45523	45291	45810	45942	44912	45736	46042	45845	45922	45901	46025	45934	46030	46485	46536	46862	46294	46544	0.118
20.998	44363	44726	45092	44804	45046	44913	45067	45321	45373	44793	45277	45395	45758	45326	45599	45291	45062	46034	45917	46232	46387	46020	46399	46341	46402	46607	46209	46497	46076	0.118
21.014	44393	44731	44648	44644	45358	45370	45061	45271	45039	45536	45417	45622	45262	45824	45411	44975	45332	45853	46047	46081	46329	46465	46741	46054	46487	46653	46910	47029	46257	0.118
21.03	44262	44565	44525	45037	45288	45320	45199	44960	45275	45097	45589	45605	45667	46000	45838	45178	45469	46173	46216	45912	46362	46662	46335	45988	46769	46528	46455	46616	46749	0.117
21.046	44955	44480	45535	44902	45528	45195	45293	45318	45137	45390	45584	45610	45359	45874	45937	45569	45473	46172	45762	46222	46217	46296	46038	46586	46595	47007	47138	46924	46763	0.122
21.061	45069	44645	45012	44670	45410	45124	45482	45610	45572	45119	45241	45818	45663	45185	46132	45423	45909	45993	46434	46431	45822	46683	46811	46446	46828	46786	46820	46817	46715	0.123
21.077	44590	45014	44915	45282	45621	45086	45155	45600	45215	45225	45481	45795	45482	46263	45649	45205	45529	46109	45971	46340	46375	46082	46659	46395	46780	46715	46758	46797	46717	0.119
21.093	44740	44485	45202	44976	44827	44865	45488	45598	45663	45529	45273	45850	45494	45836	45932	45574	45838	46272	46697	46465	46303	45687	46420	46463	47081	46420	46401	46650	46394	0.12
21.109	45071	44890	45108	45296	45337	45377	46090	45619	45434	45635	45516	46025	45731	45596	46169	45493	45665	46142	46640	46650	46510	46507	46607	46470	46787	46882	47128	46798	47027	0.123
21.124	45172	44884	45301	45306	45508	45570	45405	45499	45867	45755	45885	45408	45860	45928	46012	45494	46136	46618	46279	46215	46826	46326	46730	46574	47270	46940	46882	47165	46590	0.123
21.14	45267	44877	45068	45170	45538	45385	45606	45457	45600	45995	45711	45882	46162	46376	46264	45412	46063	47115	46574	46701	46445	46603	46466	46319	46619	46891	47014	47345	46960	0.124
21.156	45436	44692	45476	45199	45384	45544	45492	45750	45843	45929	45585	45941	45992	46086	46002	45788	46488	46571	46119	46409	46844	46680	46536	47003	47080	46808	47064	47503	46786	0.125
21.172	44845	44722	45339	45206	45638	45681	45908	45560	45597	45583	46132	46235	45779	46149	46614	45606	46121	46586	46379	46813	46690	46583	46464	46648	47431	47009	47216	47123	47156	0.121
21.188	45586	45493	45179	45792	45948	45636	45626	45410	45643	45901	46245	46261	46075	46111	46110	45089	45994	46670	46783	46865	46970	46466	46882	46826	47638	47023	46957	47060	47109	0.126
21.203	44943	45370	45385	45214	45607	45806	45479	46085	45801	45469	45930	46150	45900	46183	46254	45933	46129	46517	46520	46654	46904	46715	46656	46850	47273	46875	47149	46917	47147	0.122
21.219	44916	45345	45378	45595	45770	45728	45960	45773	45669	46019	46160	45907	45799	46019	46351	45835	46186	46512	46796	46884	46465	46585	47174	47061	46777	47037	46999	47550	47158	0.122
21.235	44934	45254	45228	45855	45962	45508	45850	46130	45743	46197	46285	46005	45905	46496	46762	45444	46341	46667	46595	47357	47050	46543	47100	47035	47252	46933	47317	47208	47726	0.122
21.251	45416	45715	45838	45659	45471	45729	46166	46128	45781	46123	46045	46163	46404	46380	46474	46236	46068	46797	46589	46841	46495	46895	46756	46904	47270	47145	47567	47417	47376	0.125
21.266	45299	45575	45561	46024	45658	45786	45896	46355	45850	45621	45936	46350	46155	46313	46562	46086	46325	46743	46976	47150	46538	46539	46889	46741	47325	47326	47182	47615	47015	0.124
21.282	45219	45446	45601	45745	46120	46055	45956	45825	46309	46265	46467	46327	46057	46418	46996	46101	46734	47154	46886	47000	46830	46538	47326	46998	47661	47597	47336	47416	47177	0.123
21.298	44799	45568	45516	45961	46201	46330	46547	45871	46093	46110	46558	46377	46175	46828	46716	46022	46548	46939	46954	46880	46718	47142	46907	46659	47638	47147	47232	47574	47101	0.121
21.314	45455	45538	45871	46079	46106	45774	46121	45771	45970	46541	46374	46380	46130	46489	46814	46145	46483	46803	46861	47157	46756	46895	47030	47095	47587	47212	47524	47160	47125	0.125
21.329	45508	45944	45936	46119	46005	45559	46221	46218	46342	46412	46393	46721	46708	46646	47115	46502	46926	46933	46973	46771	46626	47154	47654	46881	47617	47403	47739	47606	47456	0.125
21.345	45510	45997	45750	46182	46067	45910	46309	45969	46452	46204	46644	46319	46733	46563	46869	46103	46788	47212	47267	46900	47019	47216	47078	47115	47645	47923	47737	47663	47479	0.125
21.361	45484	46109	46049	46031	46504	46213	46637	46425	46485	46176	46672	46485	46541	46916	47159	46399	46540	46796	47183	47073	46840	47309	47242	47184	48212	47857	47883	47476	47358	0.125
21.377	45966	45955	45776	46325	46592	46284	46583	45993	46191	46605	46383	46973	46918	46991	47302	46073	46691	47176	47205	47114	47634	46879	47281	47649	47808	47826	47551	47658	47697	0.128
21.393	45489	45827	46388	46213	46398	45932	46229	46277	46314	46837	46330	46631	46970	46890	47212	46573	46822	47152	47142	47246	47184	47540	47638	47236	47912	48065	47634	47599	47835	0.125
21.408	45736	45903	45996	46641	46023	46027	46561	46552	46742	46443	46746	46796	46867	47027	47540	46861	46540	47315	47433	47204	47143	47457	47173	47406	47705	48004	47915	47657	47324	0.127
21.424	46174	45907	46238	46092	46570	46944	46333	46535	46074	46585	46420	46972	46713	47090	47621	46673	47014	47718	47119	47058	47252	47628	47449	47224	47703	47885	48145	47496	47388	0.129
21.44	45739	46322	46638	46664	46381	46462	46708	46764	46741	46431	46980	46781	47260	47275	47036	46607	47189	47281	47261	47168	47245	47440	47564	47199	47940	47566	47897	47532	47303	0.127
21.456	45727	45811	46458	46378	46573	46444	46452	46701	46496	46576	47071	47426	47040	46943	47318	46934	47559	47464	47484	47099	47140	47433	47344	47680	47736	48138	47754	48182	47870	0.127
21.471	46146	46407	46541	46346	46305	46415	46369	46473	46949	46253	47274	47309	46982	47273	47497	46555	47349	48067	46937	47575	47430	47510	47829	47283	47545	48034	47828	47988	48084	0.129
21.487	46366	46475	46363	46379	46513	46093	46567	46833	46579	46803	46499	47419	47490	47431	47605	47021	46810	47556	47721	47497	47829	47547	47740	47294	48123	47610	48319	47698	48038	0.131
21.503	46233	45830	46350	46116	46713	46317	46975	46765	46972	46611	47138	47491	46961	48033	47814	46973	47309	47312	47595	47422	47396	47723	47173	47677	48014	47854	48264	48079	47844	0.13
21.519	46071	46639	46352	46563	46730	46995	46910	46349	46599	47043	47555	47156	47335	47736	47874	46856	47201	47590	47574	47400	47717	47549	47928	47882	48029	48032	48336	48141	48050	0.129
21.534	46661	46813	46319	46666	46684	46814	46862	47111	46831	46437	47298	47410	47348	47734	47583	47265	47246	47548	47621	47609	47630	47746	47576	47692	48233	48008	48084	48088	48165	0.133
21.55	46261	46458	46559	46266	46832	46827	46799	47038	46581	47061	46908	47279	47394	47484	48067	47288	47155	47812	48240	47857	48035	47845	47580	47853	48222	47872	47939	48241	48230	0.13
21.566	46577	46319	46545	46482	47081	46854	46818	46915	46977	47318	47378	47376	47315	47956	48063	47267	47373	47937	47920	47467	47918	47588	47431	47685	48045	48173	48170	48231	48333	0.132
21.582	46292	46411	46417	46892	47075	46828	47146	47059	47285	46747	47242	47398	47481	47805	48122	47254	47270	47624	48085	47651	47514	47472	47652	47425	47908	48040	48240	48431	48230	0.13
21.597	46593	46553	46466	46814	46902	47329	47111	46712	46813	47852	47373	47577	47597	47467	48274	46883	47571	48095	47541	47713	47677	47874	47606	47536	48454	48168	48583	48496	48931	0.132
21.613	46925	46522	46907	46604	46803	47160	47084	47464	46999	47208	47821	47962	47763	47509	47952	47023	47083	48127	48362	47668	47828	47936	47891	47601	48615	48624	48249	48561	48223	0.134
21.629	46490	46647	46870	46886	46459	47169	47341	47153	47127	47378	47579	47957	47991	47828	47516	47030	47833	48174	48083	47594	47897	47699	47673	48015	48650	48735	48700	48309	48506	0.131
21.645	46507	46532	46769	46532	47119	46918	47310	47415	46861	47499	47445	47878	47394	47698	48123	47680	47631	48146	48309	48246	47970	47607	47925	47944	48795	48518	48292	48642	48623	0.132
21.661	46408	46417	46604	47150	47233	47125	47189	46742	47208	47497	47573	47907	47720	47462	48436	47100	47803	48175	48425	47982	48013	48052	47633	48106	48104	48550	48508	48200	49001	0.131
21.676	46456	47107	46706	46954	46833	47187	47523	47242	47098	47638	47619	47959	47814	47697	48598	47222	48018	48446	48227	48451	48041	48340	48340	48012	49156	48514	48384	48346	48390	0.131
21.692	47269	46822	46634	47187	46910	47377	47360	47385	47472	47460	48094	48024	47852	48611	48602	47219	47799	48105	48407	48166	47902	48033	47800	48234	48492	48213	48719	48608	48351	0.136
21.708	46506	46970	46886	47153	47148	47365	47138	47260	47354	47782	47828	48046	48047	48168	48561	47592	48146	48630	48681	47982	48474	47858	48055	48277	48662	48164	48618	49067	48709	0.132
21.724	46567	46802	46632	47172	47276	47358	47114	47319	47495	47466	47876	48354	48122	48128	48394	47682	47985	47918	48256	48193	48017	48468	48128	48212	48640	48434	48522	49072	48804	0.132
21.739	46568	46955	47020	46986	47390	47421	47131	47288	47649	47555	47785	48197	48159	48646	48693	47977	48344	48540	48212	48488	48317	48208	48135	47904	48446	48630	48550	48611	48668	0.132
21.755	46678	46685	46965	47045	47416	47251	47289	47243	47914	48131	48006	48427	48355	48407	49101	48001	48174	48463	48372	48569	47986	47985	48304	47796	48802	48714	48532	49177	48713	0.133
21.771	47500	46714	47376	47121	47347	47406	47660	47819	47583	47191	48212	48209	48639	48448	49144	48182	48528	48887	48372	48455	48256	48292	48255	48109	49150	49099	48521	49178	48895	0.138
21.787	47126	46956	47177	47267	47424	47473	47760	48017	47681	47964	48072	48489	48087	48706	49524	47891	48613	48239	48387	48182	48101	48253	48446	48538	49102	48543	48895	48787	48453	0.135
21.802	47335	46920	47287	47131	47596	47042	47518	47532	47883	48132	47833	48258	48774	49076	50057	48169	49020	48908	48812	48736	48624	48394	48572	48578	49115	49023	48800	48791	48835	0.137
21.818	47197	47350	47087	47399	47725	47419	47784	47716	47816	48036	48008	48584	48494	49455	50255	48579	48830	48621	48756	48305	48406	48419	48678	48257	48826	49031	48778	49342	48748	0.136
21.834	47345	46865	46921	47429	47504	47814	47923	47799	48134	47946	48274	48495	48769	49485	50167	48779	48778	48644	48459	48841	48875	48261	48407	48639	49280	48934	48646	48944	49213	0.137
21.85	46721	47575	47058	47713	47768	47904	47779	48143	47902	47848	48168	48378	48915	49963	51179	49625	49465	49053	48448	48581	48613	48462	48195	48154	48812	48981	49150	49586	49211	0.133
21.866	46807	47620	47730	47604	47318	47359	47670	47570	47962	48448	48441	48746	49374	50017	51531	49447	49683	48812	48526	48912	48669	48710	48571	48436	48846	49151	49003	49324	49011	0.133
21.881	47067	47180	47204	47857	47528	47407	47944	48281	48339	48033	48598	48356	49503	50241	52735	50282	50062	49065	48864	48897	48468	48194	48383	48567	49002	48833	49233	49182	48963	0.135
21.897	46973	47295	47387	47694	47320	47969	48156	48292	48345	48131	48657	48685	49784	51004	54374	50418	50606	49389	48859	49283	48635	48858	48720	48678	49124	49365	49325	49215	49016	0.135
21.913	47338	47563	47317	47665	47617	47717	47965	48239	48063	48297	48208	48601	49812	52381	56523	51393	50981	49765	49249	49349	48917	48560	48780	48530	49123	48895	49324	48903	49006	0.137
21.929	47472	47021	47233	47447	47633	47873	48432	48269	48392	47968	48628	49168	51064	53513	59728	52722	52293	49658	49035	49263	49011	48972	48665	48201	49117	49397	49320	49147	48916	0.138
21.944	47413	47527	47470	47893	48159	47826	47657	48065	48428	48141	48422	49422	51429	54938	65531	54142	53377	49952	49261	48846	48966	48643	48887	48619	49829	49371	49526	49530	49536	0.137
21.96	47026	47961	47664	48255	48065	47690	47813	48223	48132	48548	48509	50010	52373	57697	72711	56101	55421	50005	49352	49272	48775	48666	48845	48918	49657	49684	49102	49127	49548	0.135
21.976	47683	47735	47605	48404	47977	47993	48008	48486	48655	48464	48771	50265	53353	61438	82747	60371	58336	50632	49776	49426	48801	48953	48640	48709	49543	49432	49114	49347	49258	0.139
21.992	47636	47605	47678	47841	47854	48502	48103	48461	48778	48652	48730	50670	54692	68096	95927	66151	62872	51269	49563	49429	49158	48762	48951	48777	49078	49503	49287	49981	49555	0.139
22.007	47617	47282	47723	47805	47829	48248	48310	48601	48233	48037	49413	50929	58330	76889	109400	75900	69501	51743	49772	49595	48991	49453	49065	48760	49939	49528	49363	49348	49332	0.139
22.023	47870	47734	47499	48234	48153	48262	48162	48980	48472	48415	49326	51607	62488	88552	118594	88717	81007	52423	49895	49551	49034	48861	49215	48472	49300	49345	49374	49316	49520	0.14
22.039	47148	47177	47926	48156	47983	48147	48430	48897	48621	48851	49728	51996	68885	101768	121017	104252	96090	53452	50141	49882	48956	49061	49069	49095	49624	49923	49423	48958	49626	0.136
22.055	47484	47503	47833	48006	47719	48077	48224	49038	48700	48955	50035	52977	77498	114245	118914	116237	110826	54814	50446	49507	49060	49400	49248	48918	49575	49408	49640	49817	49385	0.138
22.07	47813	47876	47747	48193	47818	48197	48474	48562	49131	49029	49944	54678	89975	119767	112743	119892	119559	56028	51390	49956	49482	49397	49183	48674	49946	49705	49573	49639	49498	0.14
22.086	47684	47736	47609	48168	47850	48593	48483	48582	49231	48770	50430	56976	103525	119406	103929	119356	121387	59357	51722	50084	49456	49464	48909	48720	49431	49999	49303	49660	49386	0.139
22.102	47598	48456	47781	48238	48504	48563	48484	48740	48591	49529	50986	60145	113671	116383	91854	115263	119130	62620	52426	50359	49941	49619	49103	49067	49632	49581	49937	49370	49564	0.138
22.118	47829	48024	47731	48193	48367	48348	48902	48675	48723	49582	51204	65380	119124	110365	81894	109420	114610	68577	52777	50742	49940	49537	49260	48976	49688	49222	49725	49979	49672	0.14
22.134	47720	48059	47659	48157	48178	48386	48787	48593	48899	49762	51835	73774	119528	100717	72578	98499	104785	78213	53025	50923	50082	49600	49451	49038	49678	50192	49582	49712	49648	0.139
22.149	48202	48064	47842	48274	48343	48289	48888	48884	48790	49954	52967	84795	115911	88769	65144	86582	91572	91448	53593	50691	50006	49668	49422	48873	50128	49875	49450	49795	49433	0.142
22.165	47806	47782	47975	48229	48682	48513	49086	48897	49294	49990	54422	98936	109624	78669	59526	75806	80793	106799	54343	51177	50030	49930	49309	49374	49773	49423	49920	49879	49784	0.14
22.181	48208	47652	47985	47795	48359	48863	48750	48946	49211	50232	55804	113805	99666	70060	56147	68424	71309	119033	55488	51301	50256	49760	49360	48756	49807	49968	50090	50161	49794	0.142
22.197	48123	47970	48111	48021	48474	48625	48943	49145	49214	50712	58565	124297	87781	63880	54323	62543	64009	123516	56417	51515	50075	49903	49967	49153	49887	49973	49972	50028	49928	0.142
22.212	47857	48254	47773	48460	48405	48600	48517	49174	49253	50782	62900	126216	77650	58954	53081	57091	58924	120802	58128	51885	50271	49724	49642	49617	50129	50231	50085	49704	50162	0.14
22.228	48052	48281	48296	48280	48438	48725	48911	48962	49752	51827	68867	122870	69756	56363	51994	54942	55667	117005	60993	52139	50539	50079	49791	49373	49866	49752	49920	50096	50162	0.141
22.244	47984	48000	47985	48540	48421	48587	48973	48909	49882	52735	78614	115326	64004	53804	51529	53260	53512	109814	65860	52707	50734	49700	49364	49638	50319	50008	50143	50343	49532	0.141
22.26	47636	48392	48342	48157	48575	48768	48867	48944	50573	53646	91938	104583	59133	52893	51237	51890	52587	98386	73123	52436	50259	50017	49943	49782	50090	49982	50224	49797	50037	0.139
22.275	48224	48262	48054	48420	48497	48986	48982	49460	50192	55182	109736	92232	55774	52238	51099	50915	51494	85544	85066	53149	51148	50384	49674	49777	50059	49998	49958	49863	49924	0.142
22.291	47861	47861	48285	48656	48603	48839	48953	49556	50496	57858	126720	80855	53626	52110	50630	50781	51520	75081	101981	54053	51249	50090	49821	49525	50330	49889	50305	50075	50077	0.14
22.307	48217	48242	48290	48491	49036	48761	49101	50130	50822	60917	135582	70983	53137	50951	50781	50257	51214	68028	119391	55147	51435	50181	50102	49733	50605	50102	50041	50253	50158	0.142
22.323	48156	48180	48008	48505	48938	49094	49099	49641	51744	66395	132474	64149	51883	51154	50360	49964	50449	61934	131631	55850	51583	50242	50066	49441	50175	50152	50292	49941	49830	0.142
22.339	47923	47986	48420	48531	48810	48928	49439	49784	51780	74701	121126	59033	51457	50562	50438	49637	50355	57815	133797	57658	51460	50523	50182	49883	50248	49994	50362	50522	50342	0.141
22.354	48002	48060	48516	48464	48936	48877	49915	50264	52828	86481	110967	55728	51254	50583	50542	49624	50152	54929	125981	60333	52223	50129	50387	50021	50450	50346	50230	50148	49769	0.141
22.37	48235	48248	48705	48797	48628	49099	49380	50133	54029	102578	99171	54580	50770	50256	50157	49448	49884	53410	114189	64302	52254	50580	50534	49551	50686	50703	50405	50513	49630	0.142
22.386	48026	48791	48619	48977	48782	49174	49609	50473	55534	119688	85349	53631	51054	50226	50484	49237	49549	52508	101673	70835	53270	51179	50541	49403	50417	49902	50233	49678	50374	0.141
22.402	48148	48196	48543	48671	49076	49076	49379	50561	57560	132805	72971	52731	50956	50384	49538	49158	49787	51992	88912	81393	53008	51374	50784	50168	50720	50196	50602	50177	50543	0.142
22.417	48482	48797	48891	48943	49044	48786	49593	50458	60168	135528	64583	51922	50795	50007	50161	49537	49473	51638	75985	96496	54433	51217	51005	50055	50170	50378	50301	50387	50247	0.144
22.433	48655	48787	48476	49141	49161	49080	49820	51400	63572	126709	59508	52190	50269	50059	50324	49696	49365	51477	65874	114716	55238	51529	51172	50163	50508	50903	50430	50455	50428	0.145
22.449	48595	48062	48340	49269	49041	49262	49519	52413	69710	116199	56460	51056	50315	50194	50101	49040	49599	51221	59161	131144	55831	52122	51001	50377	50679	50068	50465	50537	50314	0.145
22.465	48335	48594	49003	49070	49366	49148	50149	52529	80038	105423	54989	51014	50032	50450	49927	49384	49106	51098	55803	137142	56747	52064	51103	50671	50303	50152	50591	50742	50413	0.143
22.48	48696	48387	48646	49421	49140	49709	49824	52791	93234	92154	53984	50798	50127	50291	49669	48968	49416	50751	54383	131786	58754	52302	51545	50557	50369	50343	50255	50305	50448	0.145
22.496	48284	49005	49031	49250	49521	49160	50227	53811	108919	79499	53028	50850	50075	50202	50425	49385	49660	50586	53303	119789	60995	52968	51326	50691	51155	50800	50046	50738	50564	0.143
22.512	48734	48526	48773	49166	49415	49537	50146	54810	122094	69065	52586	50125	49879	50280	49963	49047	49320	50257	52506	106770	64053	53228	51554	50937	51001	50921	50430	50432	50038	0.146
22.528	48597	48546	49104	49100	49800	49940	50521	55809	129765	62379	51621	50496	49968	50556	50289	49105	49803	50659	52205	94370	69234	53749	51768	51356	50824	50618	50440	50623	50290	0.145
22.544	48569	48874	48669	49041	49911	50145	51054	57578	128541	58671	52004	50600	49813	50216	50258	49127	49729	50262	52074	81794	77163	53828	51743	51673	51061	50715	50750	50860	50534	0.145
22.559	48905	49182	49193	49298	49663	50250	50913	60483	121246	56362	51355	50571	50197	50380	50654	49175	49689	50140	51610	70028	88822	54353	52167	51315	50678	50698	50612	50643	50452	0.147
22.575	48904	48922	48984	49284	49974	50376	51692	64012	111706	54243	50840	50649	50555	50349	50600	48883	49552	50035	51189	61604	103404	55039	52116	51776	50784	50694	50313	50785	50669	0.147
22.591	48879	48628	48865	49487	50099	49860	51689	70055	100217	53991	51199	50486	50574	50293	50487	49334	49557	50283	51214	57236	118113	56122	52537	51578	51041	50980	50878	50931	50657	0.147
22.607	48860	48638	48928	49718	49932	50301	52304	78380	88909	53139	51300	50421	50824	50689	50653	49472	49880	49919	50972	54964	128117	55838	53151	51705	51818	51086	50617	51068	50745	0.146
22.622	49016	48945	49221	49083	49752	50698	52494	89330	77888	52434	50760	50904	50004	50557	50799	49655	49740	49998	50973	54391	129539	57289	52758	52193	51668	51051	50341	50905	50970	0.147
22.638	48798	48852	49205	49240	50591	50442	52860	101368	68845	52364	50135	50887	50097	50862	51108	49567	49591	49862	50933	53133	124231	58193	53032	51857	51020	51272	51008	51081	50739	0.146
22.654	49044	49005	48776	49467	50456	50802	53554	110626	62891	51764	51058	50554	50311	50964	51525	49649	49827	50167	50018	52173	115311	59472	52767	52391	51536	50886	50865	51152	50928	0.148
22.67	48813	49135	49229	49362	50056	50981	53680	116956	59462	51652	50755	50412	50833	50997	51839	50134	50213	50212	50744	52236	103107	62171	53680	52081	51447	51026	50663	50716	51054	0.146
22.685	49018	49426	49247	49225	49671	51339	54277	118813	56905	51409	50700	50706	50592	51242	52929	49983	49985	50487	50817	51682	90847	65166	53680	52611	51679	50907	51090	51257	50504	0.147
22.701	48885	49372	49273	49831	50118	51189	55832	117049	55368	50977	50382	50657	50872	51503	53227	50225	50625	50670	50651	51987	78185	69656	54026	52560	51914	51464	51130	51164	51319	0.147
22.717	49041	49135	49480	49331	50278	51698	56425	111323	54826	50997	50643	50681	51177	52233	54660	51232	50789	50387	50417	51542	69778	77197	54504	52542	51820	51478	50725	51226	50866	0.148
22.733	48887	49079	49000	49533	50345	51672	59046	102656	54158	50956	50461	50828	51527	52628	54858	52125	51602	50465	50408	51606	62043	86778	54910	52742	51549	51334	50882	51218	51119	0.147
22.748	49060	49166	49448	49237	50761	51198	62381	93708	53459	51007	50546	50959	52194	53873	55544	53045	52615	50663	50976	51552	57617	97183	54869	53514	52106	51163	51216	50749	51383	0.148
22.764	49161	49123	48980	49541	50495	51383	66512	85349	52914	50630	50982	50970	52778	55221	56092	54158	53345	50721	50620	51305	55675	108242	56179	52555	52023	51289	51210	51548	51264	0.148
22.78	49134	49123	49274	49842	50764	51479	72181	77122	52836	50531	51054	51212	53978	56172	56112	54657	54442	51028	51017	51082	54464	116131	56177	52925	52336	51616	51371	51266	51536	0.148
22.796	49023	49080	49251	50034	50282	51742	79714	70662	53080	51230	51161	51911	54610	56074	55434	54843	55049	51200	50281	50933	53704	119332	56740	52815	52929	51267	51506	51778	51036	0.147
22.812	48864	49529	49284	50062	50572	52208	88101	66016	52780	51485	51738	52912	56261	56651	55080	55403	54940	51708	51021	50908	53187	118213	57273	53165	52713	51889	51407	51226	51464	0.146
22.827	49130	49613	49192	49705	50856	52353	96488	63459	52372	51866	51852	53292	56655	56645	54949	55720	55363	52695	51216	51191	53049	114050	57964	53265	52949	51801	51605	51203	51003	0.148
22.843	48965	49278	49596	50295	50637	52995	103579	60396	52274	51931	51921	54282	57612	55848	54286	55076	55252	53654	51600	51506	53319	107644	58476	53484	53153	51911	51833	51315	51315	0.147
22.859	49264	49436	49738	50379	51023	52597	107768	58623	52733	52188	52014	55457	57739	55317	53700	53933	54579	54878	51923	51452	53533	97750	59856	53922	53623	52087	51936	51456	51287	0.149
22.875	49017	49286	49279	50179	51030	52957	110372	57581	52306	52506	52402	55572	56770	54312	53167	53149	53848	56733	52416	52330	53439	87076	61273	53242	53634	52815	52444	52100	51499	0.147
22.89	49223	49627	49722	49923	50816	53305	109022	56593	51958	52088	52071	57232	55420	53558	52212	52823	53270	57692	52478	52017	52909	77433	63769	53957	53974	52839	52348	51658	51705	0.149
22.906	49460	49212	49840	50610	50937	53956	105149	55293	51784	52098	52457	57344	54333	53397	52037	51723	52513	57477	52565	52296	52723	70356	66453	54187	54414	53075	52395	52013	51054	0.15
22.922	49205	49411	50037	50764	50889	54748	99445	54811	51570	51991	52750	57557	53546	52321	51618	50827	51975	57234	53053	52392	52568	64720	69749	54501	54621	52561	52648	51845	51387	0.149
22.938	49474	49739	50098	50295	51259	56267	92609	54169	52093	51198	53032	56464	52921	51896	51370	50223	51923	56740	52564	51981	52162	60287	75012	54343	54332	53307	52707	52093	52434	0.15
22.953	49551	49740	49876	50720	51290	57501	86384	53654	51528	51441	54045	56112	52001	51081	51326	50372	50783	55711	52911	52099	51424	57057	80363	54803	54914	53716	52783	51716	51502	0.151
22.969	49770	49849	50274	50674	51453	60102	80321	53021	51276	51507	54721	54640	51819	51514	51029	50026	50638	54568	53441	51673	51738	55473	87780	54630	55105	53353	52974	52157	51623	0.152
22.985	49210	49950	49761	50935	51363	63083	74835	52915	51128	51413	56323	54115	51427	50877	51231	49636	50339	53834	54433	51574	51228	54226	94791	54933	55464	53696	52758	51916	51938	0.149
23.001	49083	49806	50160	51008	50914	67653	71147	52371	51324	51606	57391	53018	51269	50705	51173	49641	50167	52286	55662	51622	51369	53520	100640	55555	55176	53909	53259	51692	51938	0.148
23.017	49825	49859	50108	51091	51331	73587	67059	52678	51449	52086	57694	52435	50626	51173	51118	49536	49781	51907	56402	51175	50991	52853	104942	56031	55543	53909	53139	52085	51377	0.153
23.032	49860	50260	49828	50840	52061	80729	64575	52198	51349	52562	56802	51664	50484	50333	51032	49740	49974	51465	57207	51357	51094	52675	107788	55978	55588	53577	53311	51952	51860	0.153
23.048	49992	49872	50200	50857	51705	89146	62229	52087	51560	53616	55915	51600	50791	51009	51081	49602	50071	50965	57413	52035	50776	52697	106844	56479	55391	53662	53367	52232	51909	0.154
23.064	49827	49571	50531	50746	52293	96903	60922	51760	51298	54382	55084	51425	50376	50724	50727	49743	49961	51106	56466	51882	51703	52422	105171	56572	55661	53670	53325	52112	51849	0.153
23.08	49644	50337	50366	50772	52577	102506	59012	51604	51549	56086	54051	51128	50721	50774	50612	49662	49811	50987	55183	52424	51668	52080	101726	57546	55745	53912	53510	52606	52018	0.151
23.095	49968	50209	50176	50714	52978	105259	57940	51696	51133	56976	53200	51343	50482	50615	50890	49711	50014	50664	54371	53240	51354	51807	95196	58812	55857	53670	53482	52202	52051	0.153
23.111	50047	50150	50053	51612	53905	104303	57288	51689	51580	57452	52454	50964	50763	51037	51143	49559	49708	50697	53111	54208	51121	52065	88855	59011	56030	54207	52975	52290	51896	0.154
23.127	50073	49742	50161	50979	53990	102419	56412	51915	51901	56868	52039	50493	51023	51159	50392	49263	50395	50527	52469	55764	50992	51547	81196	60172	55954	53835	53798	52516	52113	0.154
23.143	49794	50189	50084	50629	54469	97762	55356	51211	52998	56457	50963	50329	50431	50638	51217	49701	49955	50268	51770	57034	51206	51372	74584	60885	55900	53810	53376	52403	52096	0.152
23.158	49829	49932	50035	50969	56055	93339	55043	51970	53464	55792	51115	51066	50559	50695	50692	49669	49391	50879	51021	57777	51707	51373	68420	62291	56083	53792	53593	52699	52796	0.153
23.174	50115	49907	50589	51144	57376	87658	54888	51866	54747	54628	50987	50676	50842	51025	50701	49308	49990	50744	51208	57551	51679	51609	64044	64010	56356	53369	53541	52662	52207	0.154
23.19	50275	50041	50201	51215	60002	83325	53913	51725	56360	53128	51261	50780	50546	51096	51086	49509	49955	50370	51235	57090	52177	51730	60641	64826	56850	54093	53199	53030	52432	0.155
23.206	49979	50492	50385	51249	63397	78361	53761	51740	57316	52966	51014	51134	50911	50557	51179	49349	50100	50077	50328	55628	52245	51371	57465	66715	57096	53931	53616	52475	52423	0.153
23.222	50197	50144	50537	51705	68065	75133	53957	51781	57715	51842	50585	50660	50873	50765	50913	49783	50016	50370	50861	54330	52476	51114	55715	68969	56921	54702	53459	53061	52112	0.155
23.237	50412	50025	50262	51630	73627	71999	53257	51691	57261	51483	50730	51026	50225	50857	50695	49637	50045	50455	50421	53847	53647	51527	54500	70950	57469	54024	53488	53214	52557	0.156
23.253	50198	50356	50771	51796	81378	69439	53096	51825	56940	51212	51041	50795	50425	50849	51404	50067	49727	50742	50610	52556	54598	51571	53657	73176	58110	54244	53211	52750	52274	0.155
23.269	50026	50105	50751	51658	88334	66829	52371	53195	56744	51124	50750	50947	50701	50830	51019	49483	49968	50575	50633	52026	56257	51949	53196	75309	58422	54589	53325	52763	52335	0.154
23.285	50351	50879	50953	52259	93980	65574	52773	53369	55266	51081	50927	50849	50974	50432	50963	49471	50041	50749	50860	51545	57292	51526	52827	78412	58488	54588	53524	53061	52813	0.156
23.3	50176	50394	51630	52123	97365	64159	53192	54403	54219	51052	51122	50284	50930	50780	51151	49376	50120	50849	50555	51155	57629	51980	52330	80007	59265	54703	53618	53107	52920	0.155
23.316	50379	50626	51535	52483	97259	62618	52994	55210	53545	51138	50822	51002	50634	50542	50768	49539	50024	50562	50417	51105	57904	51375	52213	82280	59505	54805	53480	52895	52672	0.156
23.332	50307	50996	51515	52291	96912	61162	52853	56515	52831	51031	51041	50948	50827	50906	51308	49651	50383	50343	50496	51048	57467	52512	52211	83141	60302	55031	53548	53209	52821	0.156
23.348	50911	50911	51657	53198	94097	60109	52676	57327	52018	50924	50820	50915	50957	50970	51192	49635	49644	50463	50859	50651	56361	51965	52322	85207	60538	54982	53466	53247	52431	0.159
23.363	50300	51208	51185	52849	90412	59051	52294	57874	51979	51010	50735	51012	50713	51109	51220	49546	50053	50763	50309	51273	55415	52519	51912	86967	61725	55442	54119	52830	53281	0.156
23.379	50317	51130	51683	53267	86682	58606	52464	57337	51552	50981	50717	50809	50959	50790	51084	49865	50149	50321	50592	50761	53910	52990	51773	86907	61933	55828	53885	53028	53042	0.156
23.395	50788	50901	51432	54013	83224	58052	52661	57540	51265	50654	50695	50621	50920	50885	50920	49884	50049	50361	50840	50834	53793	53606	52124	87400	63133	55708	53942	53076	52840	0.159
23.411	50838	50944	51801	54265	79218	57376	52941	56564	51122	51056	51016	51284	50768	51465	51630	50123	50550	50522	50677	51001	52458	54049	51786	87751	63508	55286	53884	53054	53230	0.159
23.426	51000	51120	51686	54665	76616	57032	53025	56069	51028	50665	51082	51229	51170	51120	51230	49679	50148	50666	50844	50894	52348	55382	51878	86251	65032	55854	54318	53200	53363	0.16
23.442	51048	51012	51506	55086	73863	56479	53428	55299	51445	50978	50869	51409	51161	51175	51478	49874	49966	50656	50984	50776	51516	56181	51643	85135	65793	56228	54465	53725	53184	0.16
23.458	51117	52277	51926	56648	72824	55781	54124	54238	51042	50973	50719	51439	50923	50953	51100	50038	50248	50698	50838	51002	51052	57570	51605	83289	67349	56010	54738	53695	53900	0.161
23.474	51448	51704	52079	57905	71530	55725	55267	53884	51051	51049	50728	50735	51316	51086	51331	49998	50186	50832	50566	51069	50954	57787	52229	81413	68808	56214	54801	53961	53349	0.163
23.49	51075	51999	52409	60571	70762	55343	55442	52967	51134	51014	51081	51332	51247	50666	51633	49749	50158	50671	51066	50908	50999	57796	52105	78185	71752	56695	55224	53635	53795	0.16
23.505	51070	52018	53014	64091	69475	55010	56907	53116	51508	50909	51115	50822	51149	51390	51968	50225	50702	50786	50821	50640	51302	57658	52524	75257	75167	57124	55161	54146	53266	0.16
23.521	51809	52080	53700	69961	69042	54767	57707	52962	51213	50767	50761	51212	51416	50994	51356	49977	50157	50636	51063	50979	51094	57553	52533	71250	78533	58001	55194	53773	54014	0.165
23.537	51553	52162	54089	79217	69018	54345	57887	51917	51137	50962	51118	50800	50963	51573	51939	50102	51041	50941	51138	50756	50973	56337	53048	67972	82728	58929	55157	54404	54115	0.163
23.553	51249	52125	54697	91095	68607	54472	58213	52092	51422	51248	50896	51520	51101	51438	51897	50317	50566	50756	50493	50988	51356	55120	53178	64568	88200	58980	55368	54485	54423	0.162
23.568	51368	52133	55574	105191	67579	54349	57999	52300	51219	51224	51058	51614	51099	51349	51659	50148	50743	50614	51032	51401	50915	54303	53091	61983	93112	60287	55845	54555	54132	0.162
23.584	51774	53024	55707	118803	67219	54403	57583	51873	51207	50941	50964	51083	51122	51225	51554	50224	50564	50752	50526	50976	51361	54030	53394	59494	99549	61091	56345	55005	54638	0.165
23.6	51833	53316	56951	126466	66537	53806	57145	52003	51099	51193	51184	51043	51054	50980	50958	50138	50377	50689	50625	51265	50994	53149	53779	57889	104644	62386	56749	55066	54973	0.165
23.616	51358	53897	57986	125954	66278	54038	56694	51561	51282	51296	50820	51427	50909	50943	51647	49830	50616	50622	50760	50834	50996	52721	54276	56038	108209	64057	57490	55460	54779	0.162
23.631	51852	54237	60120	123007	65259	53667	55420	51999	51565	51430	50867	51179	51197	51217	51592	49986	50106	50907	50478	51210	51241	52424	55327	55408	108922	66833	57979	55671	54718	0.165
23.647	52017	55288	64076	120023	64478	54323	55165	51982	51586	51203	51197	50784	51122	51129	51158	50040	50489	50775	50994	50954	51138	52154	55919	54789	106337	70830	59259	55265	54990	0.166
23.663	52516	55754	69015	113925	63774	54351	54744	51770	51125	50932	51209	51155	51106	51052	51428	49553	50717	50647	50723	50807	51329	51450	56552	54409	100204	75829	60176	56048	55643	0.17
23.679	52817	57687	78436	105595	62991	55020	53990	51332	51155	51258	51609	51291	51249	51442	51188	49735	50250	50993	50794	50989	51055	52138	57247	53645	92684	83615	60818	56236	55723	0.171
23.695	53533	59184	91886	96913	61889	55756	53733	51346	51424	51115	51072	51516	51029	51065	51590	49928	50618	50538	51122	50517	51246	51483	57554	53168	85167	93857	63072	57157	56670	0.176
23.71	54028	61694	110756	89196	61010	56132	53335	51726	51152	51232	51169	51303	51623	51083	51376	49676	50326	50715	51157	51000	50961	51143	57952	53577	77608	108009	65381	57703	57008	0.179
23.726	54914	66014	133334	83057	59488	57276	52690	52126	51490	51382	50975	51386	51430	51174	51569	50174	50161	50685	51020	51071	51102	51497	57556	53206	70621	122572	68794	58559	57992	0.185
23.742	55004	72920	151079	76676	58748	57696	52793	51696	51230	51404	51394	51318	51176	51125	51938	50345	49747	50793	50851	51211	50836	51722	57459	52688	65373	134189	73790	60018	58837	0.185
23.758	56086	84161	152972	71917	57631	58358	52720	51806	51390	51041	51183	51091	51305	51317	51880	49975	50100	50642	51170	50984	50984	51629	57234	53167	61133	136631	82370	61105	60165	0.192
23.773	57450	99994	144474	67688	56867	58134	52338	51491	51433	51738	51619	51255	51781	51941	52031	49913	50425	50858	50985	50928	51043	51424	56153	52724	58651	129178	93575	62549	62029	0.201
23.789	58861	120349	135592	64833	55988	57914	52367	51476	51676	51214	51319	51324	51748	51613	51321	50231	50482	50582	50651	51346	51243	51380	55619	52953	57391	118079	108790	64481	62924	0.21
23.805	61349	142420	125662	61199	55243	57902	52250	51865	51692	51583	51154	51556	51716	51810	51723	50030	50177	50802	50861	50668	51026	51202	54660	53358	56652	107831	126849	66754	64777	0.225
23.821	64861	154108	109657	59183	54832	57372	52544	51251	51789	51327	51404	51402	50817	51454	51877	50279	50296	50993	51112	50647	51579	51456	53889	53014	55614	96617	141732	70912	67760	0.247
23.836	71617	151135	93829	57338	54852	56749	51698	51707	51635	51630	51599	51599	51713	51691	51514	50475	50528	51066	51020	50885	51324	51211	53090	53231	55857	84807	146811	75898	71939	0.29
23.852	81812	142123	81058	55695	54488	55339	52194	51458	51304	51775	51526	51880	51549	51654	51329	50102	50797	51046	51282	51356	51192	51459	52681	53289	55131	74432	137665	84717	77763	0.354
23.868	96950	134100	71647	54922	54922	55567	51915	51768	51712	51404	51631	51764	51667	51804	52114	49915	50311	51290	51157	51522	51745	51248	52648	53721	54958	67418	124993	97145	89165	0.45
23.884	117872	122361	64985	54203	54938	55023	52694	52128	51335	51721	51806	51527	51416	51606	51760	49871	50353	51300	51182	51335	51339	51648	52290	53582	54844	62676	114380	114222	103863	0.582
23.9	141603	105418	60732	53571	55964	54332	52343	51703	51896	51750	51689	51326	51573	51428	52008	50365	50288	50737	51108	51252	50972	51154	51551	54057	54714	60148	102972	134889	123137	0.732
23.915	160807	91190	58106	53702	56192	53959	51995	51777	51483	51571	51878	51646	51501	51590	51738	50179	50328	51046	51123	51052	50763	51216	51708	54565	54552	58400	89483	151152	144605	0.853
23.931	162020	78569	56998	53251	57350	53579	52096	51535	51431	51954	51512	51713	51684	52008	51844	50340	50394	51167	51081	51060	50798	51267	51632	54788	54456	57409	76966	152951	156047	0.861
23.947	150039	70470	55937	53521	57783	54061	51939	51264	51212	51311	51965	51748	51273	51868	51739	49898	50797	51206	51127	51270	51297	51603	51296	55060	54947	56677	68194	138730	150605	0.785
23.963	138421	64303	55264	53114	58337	53762	51861	52241	51795	51121	51401	51089	51519	51648	52019	50315	50308	50628	50869	51013	51259	51441	51695	55112	55406	56495	63590	126606	135899	0.712
23.978	127443	61063	54272	52769	57689	53031	51936	51551	51337	51170	51480	51552	51794	51641	51880	50231	50366	50598	51045	51104	51120	51298	51764	55306	54555	55761	60556	117148	124157	0.642
23.994	110960	58288	53183	52883	57645	52736	51544	51953	51556	51110	51285	51507	51361	51288	51912	49935	50305	50867	51068	51310	51510	51343	51446	55331	54880	54867	58952	103750	113789	0.538
24.01	93319	56690	53092	52897	57651	52544	51730	51089	51323	51237	51916	51447	51373	51443	52069	50260	50580	50876	50935	51195	51083	51365	51350	56188	54804	54673	58022	88375	98497	0.427
24.026	79520	55715	53181	52197	57296	53010	51710	51689	51477	51370	51066	51019	51679	51668	51965	50109	50325	51011	50904	50998	50950	51347	51371	56352	54833	53959	56984	75644	83238	0.34
24.041	69549	54230	52078	52420	56085	52509	52393	51753	51503	51259	51287	51391	51975	51324	51525	50440	50299	50739	51045	51340	50508	51099	51227	56119	54699	54196	56461	67305	72457	0.277
24.057	63094	54339	52266	52528	56023	52454	51484	51548	51359	51091	51471	51498	51356	51330	52014	50463	50221	51512	50785	51061	50669	51396	51093	55804	54595	54032	55934	62718	65193	0.236
24.073	59569	53500	52615	52427	55248	53019	51868	51463	51741	51336	51456	51279	51070	51760	51689	50501	50573	50771	50696	50448	51142	51420	51449	55954	54871	53687	55417	59555	61504	0.214
24.089	57316	53053	52351	52344	55220	52303	51727	51563	51672	51332	51715	51553	51495	51376	51601	50296	50517	50609	50832	50962	51507	51877	51612	55917	54781	53893	54755	58704	59242	0.2
24.104	56523	52706	51949	52946	55054	52136	51574	51190	51134	51943	51561	51560	51719	51625	52367	49921	50684	50944	50854	51341	51040	51104	51332	56008	55078	53934	54495	57396	57793	0.195
24.12	55010	52807	52147	52621	54840	52610	51917	51250	51592	51458	51457	51346	51570	51659	52306	50122	50329	50830	51277	51123	51259	51503	51374	56123	55061	53820	54356	57096	57093	0.185
24.136	54390	52809	52132	52973	54643	52552	51683	51752	51577	50733	51841	51557	52045	51809	52386	50091	50472	51041	50942	51344	51085	51578	51355	55532	55640	54037	54594	56477	56320	0.181
24.152	53857	52217	52321	53802	54289	52613	51825	51511	51677	51567	51113	51843	51864	51418	51479	50389	50752	50825	51163	51286	50850	51404	51428	55162	56150	54163	54087	55524	55561	0.178
24.168	53022	52639	52146	54423	54500	52985	52198	51675	51536	51721	51973	51377	52141	51866	52317	49878	50467	51173	51109	51086	51112	51518	51679	54868	56938	54533	54500	54771	55021	0.173
24.183	53485	52356	52453	55999	54022	52587	52147	51676	51638	51724	51919	51893	52066	51882	52170	50452	50670	51185	51069	51028	51159	51494	51658	54107	56900	53832	53996	54616	54964	0.176
24.199	53008	52766	52536	57212	54615	52883	52134	52183	51942	51977	51861	51747	52076	52110	52400	50661	51067	51251	51504	51445	51411	51299	52104	53977	57925	53442	54126	54465	54583	0.173
24.215	53124	52843	52651	59394	54238	53052	52878	51778	52084	51741	51870	52142	52625	52634	52683	50899	51022	51301	51509	51287	51287	51796	52049	53713	58760	54343	53850	54854	54761	0.173
24.231	53013	52599	52600	61371	54630	53047	52831	52442	52144	51841	52226	52435	52252	52617	53109	50802	51384	50973	51072	51593	51739	51361	52560	53163	59337	54508	54075	54515	54510	0.173
24.246	53112	52885	52993	61965	54309	52799	52820	52240	52352	51831	52400	52504	52599	52725	53171	51226	51275	51723	51417	51646	51486	51952	52714	53083	60122	55192	54113	54197	54781	0.173
24.262	52466	53039	53048	61863	54675	52731	53252	52681	52311	52073	52268	52488	52663	52936	53339	51839	51809	51649	51971	51824	51893	51817	52373	52981	60874	55351	54577	54443	54494	0.169
24.278	52660	53296	53427	61668	54170	52738	53239	52926	52350	52258	52402	53087	53011	53593	53665	51839	52194	51317	51823	51560	51801	52248	52861	52639	61312	55526	54001	54573	54024	0.17
24.294	52672	52729	54183	61681	54336	52421	52998	52858	52529	52094	52778	52833	53190	53604	54101	52086	52342	51644	51682	51771	51893	52640	52541	53121	61002	56305	54511	54291	54447	0.17
24.309	52350	52700	54835	60734	53848	52794	53074	53140	52592	52561	52777	52889	53244	53753	53794	52290	52399	52246	51431	51556	52041	52786	52311	52836	60460	57094	54384	54526	54356	0.168
24.325	52515	52981	56543	59396	53831	52267	52702	53307	52797	52465	52635	53056	53633	53744	53473	52362	52826	51958	51954	51968	52257	52792	52446	52646	59071	58754	55215	54484	54640	0.17
24.341	52447	53029	59169	58051	53678	52417	52179	52754	52390	52823	53303	53565	53601	53363	53760	52136	52593	52749	52431	51714	52136	53121	52473	52426	58144	59627	55118	54734	54780	0.169
24.357	52575	53549	61154	57139	53362	51941	51991	52816	53221	52585	52843	53511	53142	53077	53720	52109	52775	52965	52333	51923	52179	52856	52504	52686	57102	61900	55408	54362	54386	0.17
24.373	52816	54345	64405	56207	53437	52230	52563	52451	53042	53126	53057	53002	53296	53058	53089	51848	52237	52910	52143	52167	52350	52573	51967	52645	55697	63801	55460	54301	54222	0.171
24.388	52554	54979	65620	55185	53029	52401	52331	52354	53091	52999	52878	53398	53182	52859	52607	51509	52527	52590	52647	51921	51960	52713	52464	52518	55218	64567	56896	54655	54189	0.17
24.404	52018	56861	65543	54703	52327	51757	52330	52867	52614	52799	52677	53202	52986	52769	52737	50781	51687	52475	52598	52286	52437	52993	52430	52156	54476	64605	57650	54627	54607	0.166
24.42	53117	58625	64070	53957	52420	52041	51981	52903	52382	53131	52308	52832	52579	52778	52526	50990	51489	52703	53023	52010	52418	51806	52198	52066	54127	63308	59119	55056	54596	0.173
24.436	53007	61637	63052	53545	52415	51927	51671	52375	52435	52628	52398	52719	52061	52360	52623	50993	51395	52458	52350	52925	52756	52144	51887	51760	53786	61740	60863	55348	55150	0.173
24.451	52909	63552	61464	53035	52500	51832	51979	51658	52240	53028	52064	53022	51467	52103	52197	51000	50933	52043	52782	52650	52341	51686	52073	51856	53960	61033	63281	55562	54841	0.172
24.467	53556	65420	58894	52545	52126	52128	51717	52187	52224	52218	52481	52031	51960	51784	52423	50637	51376	51368	52155	52152	51981	51831	51812	52039	53564	59120	65385	55741	55025	0.176
24.483	54822	64540	56867	52178	52286	51740	51941	51973	51798	52271	52021	52136	51597	52170	52022	50740	51295	51926	52066	51957	52007	51545	51506	51581	53376	57266	65674	56168	56107	0.184
24.499	55575	63804	55174	52080	52358	51781	51863	51983	52032	51572	52179	52113	51942	51971	51988	50559	50753	51713	52050	52174	52087	51781	51824	51734	53343	55803	64127	57670	56402	0.189
24.514	57616	62443	54156	52200	52274	51617	52090	51638	51707	51913	51784	51340	52190	51928	52450	50932	50999	51705	51595	51919	51699	51669	51732	51271	52835	54828	62524	59017	58119	0.202
24.53	60753	61307	53203	52379	52186	51413	51740	51917	51656	51885	52008	52043	52148	52266	52288	50408	51106	51520	51700	51999	51392	51835	51503	51688	53058	54287	61318	61340	60066	0.222
24.546	63605	58933	52209	52127	51975	52029	51602	51612	51867	52019	51938	52507	51824	52187	52382	50774	50957	51310	51525	51751	51464	51509	50875	51892	52840	53466	59638	63608	61925	0.24
24.562	65430	56556	52268	52056	52096	51581	52293	51694	51932	52065	51590	52069	52080	51886	52304	50906	51117	51459	50998	51498	51323	51527	51728	51712	52815	53541	57826	65750	64866	0.251
24.578	65734	56009	52062	51655	51834	51717	51462	51274	51763	52182	51646	51763	51847	51968	52893	50829	50622	50995	51180	51404	51446	51926	51406	51563	53239	53475	56993	65074	66049	0.253
24.593	63848	53681	52270	52013	51922	51724	52119	51815	51300	52045	51411	52385	52029	52186	53200	51223	51115	51193	51108	51505	51755	51160	51605	51400	52961	53080	55256	64081	65118	0.241
24.609	62456	53287	52479	51974	51528	51743	52184	51955	51711	51902	51735	51998	52154	52770	53522	50846	51416	51468	51279	51677	51371	52009	51639	52029	52988	52953	54394	62696	63913	0.232
24.625	61260	52840	52049	51776	51684	51431	51730	52098	51996	51858	51650	51740	52489	52609	54253	51277	51735	51527	51574	51536	51694	51100	51429	51350	52625	53151	53773	60989	61683	0.225
24.641	59086	52247	52117	51860	51944	51741	51897	51821	51640	51901	51837	51782	52208	53476	55311	51457	51632	51000	51224	51086	51428	51683	51306	51847	52849	53073	53852	59675	61330	0.211
24.656	56907	52281	51941	51814	51678	51582	51750	51635	51362	51748	51644	51637	52380	53385	55621	52548	51893	51364	51245	51625	51049	51436	51078	51579	53316	53099	53136	57460	58865	0.197
24.672	55303	51858	52465	51613	51733	51986	51859	51821	52077	51684	51811	52127	52364	54363	56295	52974	52639	51609	51094	51477	51424	51949	51633	51852	53061	52558	53852	56361	56992	0.187
24.688	54114	52060	52278	51686	51933	52078	51775	51813	51874	51696	51662	51978	52717	55687	57045	54203	53820	51462	51168	51611	51598	51487	51533	51757	53220	52999	53595	54993	55619	0.18
24.704	53016	52069	52269	51602	52303	51758	52237	51925	51866	51697	51885	51889	54060	56295	56502	54703	54800	51667	51368	51469	51567	51647	51677	51848	52945	53183	53784	54396	55089	0.173
24.719	52632	52532	52514	51425	51942	51743	52015	51846	51997	52096	51688	52460	54214	56554	56043	55041	55226	51422	51475	51616	51807	51320	51610	51681	52993	53811	53547	53911	54463	0.17
24.735	52632	52660	53076	52127	51722	51757	51996	51567	51727	52136	52078	53069	55200	56399	56391	55746	55183	52035	51510	51277	51233	51818	51485	51684	53080	53003	53707	53496	54274	0.17
24.751	52341	52389	52786	52154	51914	51959	52078	51999	51878	51809	51969	53256	56522	56392	55050	54914	55591	52300	51259	51309	51485	51494	51621	51644	53415	53307	53586	53592	53606	0.168
24.767	52620	52956	52927	52123	52058	52115	52263	52264	52012	52075	52372	53333	56822	56013	54789	54780	54647	52418	51271	51480	51288	51883	51380	51890	53517	53301	53917	53321	53353	0.17
24.782	52275	53256	53509	52262	52143	52231	51845	52012	52138	52195	52421	53784	56755	55649	53857	53942	54439	53634	51743	51918	51589	51316	51568	51590	53289	53504	53831	53720	53770	0.168
24.798	52326	54112	53571	52279	52287	52214	51795	52239	51923	52036	52303	55082	55993	55229	53565	53086	54092	54716	51588	51306	51634	51462	51735	51186	53254	53858	54030	53631	53555	0.168
24.814	52696	54254	53849	52278	51936	52744	52176	52175	51967	51956	52338	55628	56283	53776	53215	52634	52973	55581	51935	51150	51408	51272	52002	51824	53059	53975	54163	53782	53494	0.171
24.83	52234	53682	53627	52336	52509	52079	51878	52241	52261	52200	52312	56683	55735	53509	52802	52053	52751	56306	52504	51484	51440	51311	51384	51551	53074	54213	54970	53784	53391	0.168
24.846	52463	54133	53869	52185	52054	52440	52255	52054	52043	52594	52897	57627	54738	53060	52904	52189	52314	56287	52455	51551	51855	51541	51579	51769	53316	54323	54347	53602	53786	0.169
24.861	52667	53577	53558	52446	52173	52246	52111	52186	52325	52432	53834	57815	54522	53449	52778	51794	51502	56120	52056	51421	51503	51617	51634	51993	53304	54458	54968	54232	53517	0.17
24.877	53362	53515	53389	52456	52452	52515	52403	52433	52372	52231	54352	56946	53666	53348	52764	50959	51596	56401	52684	51593	51431	51478	51484	51912	53261	54755	54897	54333	53857	0.175
24.893	54371	53036	53228	52794	52575	52388	52521	52139	52472	52772	54985	56640	53788	52848	53026	51440	51595	55260	52912	51727	52163	52408	51599	51625	53494	54635	55122	54468	54179	0.181
24.909	54120	52891	52872	52560	52217	52435	52448	52446	52144	52843	55933	56325	53114	53598	52283	51410	51318	54782	53704	52017	52069	52163	51899	51890	53563	54428	54879	55167	54764	0.18
24.924	54453	52554	52963	52929	52607	52110	52576	52262	52315	52615	57289	55402	52871	53007	52880	51110	51754	54160	54529	51813	51877	51675	52165	51817	53581	54314	54569	54895	54518	0.182
24.94	54565	52323	52945	53004	52596	52086	52570	52187	52168	53364	57900	54199	52780	52700	53292	51444	51393	53725	55934	52288	51945	51937	51522	52601	53493	54079	54127	55010	55051	0.182
24.956	53451	52544	52882	52813	52369	52149	52485	52757	52517	53233	57879	53713	52274	52701	53013	51615	51623	53332	57506	52383	51536	51632	51877	51993	53507	53642	54451	55208	55289	0.175
24.972	53163	51946	52967	52707	52366	52101	52456	52125	52277	53972	57203	53409	52964	52827	53155	51078	52247	52146	57764	52646	51919	51772	51888	52217	53315	54188	54064	55197	54839	0.174
24.987	53475	52132	52333	52471	52733	51950	52544	52272	52788	55339	55926	53088	52534	52879	53296	50676	52048	52557	57310	52716	52212	51994	51711	52049	53360	53685	53500	54934	54772	0.176
25.003	53265	52451	52552	52791	52648	52427	52523	52181	52254	56409	56150	53196	52614	53141	54138	51566	51691	52025	56346	52988	52341	51865	51975	52361	53465	53631	53893	54140	54503	0.174
25.019	53009	52332	52742	53226	52576	52186	52070	52278	52954	57409	54965	52675	52901	52986	54519	51656	52157	51750	56036	53745	51832	51808	52360	51820	53421	53849	53589	54203	54368	0.173
25.035	52557	52056	52542	52765	52448	52361	52098	52499	52980	57703	54514	52360	53564	53552	55469	52006	51980	51599	55455	54464	52365	51769	51901	51496	53460	54163	54210	54164	54724	0.17
25.051	52407	52709	52493	52792	52567	52427	52507	52209	52738	58329	53797	52561	53313	54222	56333	51968	52030	51724	54921	55437	51902	51655	52158	51967	53488	53556	53856	54040	54377	0.169
25.066	52162	52553	52099	53097	52684	52253	52155	52733	54023	57541	53245	52590	53418	54480	57473	53015	52871	52277	53723	56286	52175	51885	51793	51778	54008	53804	54079	54103	53815	0.167
25.082	52562	52245	51964	52937	52415	52328	52103	52617	54678	56860	53152	52919	53653	56052	58886	54262	53707	51880	53085	57277	52891	51573	51743	51946	53825	54023	53489	54380	53691	0.17
25.098	52538	52316	52206	52839	53163	52448	51992	52365	55985	56012	53093	52674	53978	57303	60668	55887	55198	52244	53018	57569	52398	51871	51712	52214	53730	53756	53575	53278	54054	0.17
25.114	52166	52564	52263	53184	52531	52751	52577	52511	56557	55763	52460	52612	55152	58900	60773	57768	56798	52059	52618	57668	52446	51692	52179	52044	53546	53477	53637	53660	53501	0.167
25.129	52074	52126	52474	53139	53192	52233	52461	52719	57339	54661	53134	53196	56521	60599	60087	58577	58714	52259	52178	56452	53260	52227	52003	51627	54057	53653	53753	54151	53795	0.167
25.145	52289	52002	52534	53034	53054	52603	52792	53180	58015	54108	52818	53389	58210	60808	59794	59954	59345	52738	52009	55449	53879	51912	52076	52133	54114	53761	54031	53925	53631	0.168
25.161	52210	52345	52579	53257	52972	52430	52518	53784	58291	53338	52637	53800	59555	61082	58969	58802	59599	53020	52207	55368	54388	52243	52053	52334	54446	53590	53725	54074	53749	0.168
25.177	52321	52352	52287	53747	53498	52662	52851	54520	57941	53316	52913	54487	60680	60787	57889	59063	58978	53552	52123	54412	55814	51990	52044	51972	54449	54002	53783	53308	54066	0.168
25.192	51575	52160	52649	53336	53336	52595	52627	55087	57103	53024	52322	55346	60919	59794	56678	58534	58432	54930	52232	53381	56950	52568	52083	51970	54878	53457	53994	53708	53760	0.164
25.208	52603	52353	52721	53483	53681	53089	53014	55823	56345	53090	53330	56869	60838	58322	55508	57115	57279	56075	52308	52969	57823	52296	52176	52572	54960	54440	53715	53875	53956	0.17
25.224	52084	52474	52903	53735	53880	53583	52862	57056	55494	52893	53457	58444	60164	57577	54431	55842	56288	57800	52261	52713	58360	52582	52204	52912	54677	54183	53248	53928	53890	0.167
25.24	52148	52294	52946	53478	53893	53308	53247	57892	54851	52454	53223	59800	59773	56150	53957	54580	54643	59282	52658	52586	57404	52709	52078	52590	55090	54194	53867	53826	53726	0.167
25.256	52609	52356	52929	53347	53492	53894	54038	58085	54335	53470	54200	60530	58394	54836	53407	52930	53969	60425	52998	52168	57130	53488	52484	53217	55269	54281	54049	53837	53856	0.17
25.271	52665	52457	52615	53371	53255	54079	54196	58990	54440	53442	54617	62630	56744	54111	53414	52433	52883	61012	53310	52404	56535	53226	52701	53435	54812	54130	54042	53442	53644	0.17
25.287	52580	52433	52989	53157	53381	53569	54742	58724	54027	53541	56055	61498	55893	53496	52883	51645	52674	59649	53474	52618	55802	54758	52436	53504	54702	54261	53853	54085	53850	0.17
25.303	52015	52704	52823	53468	53032	53653	54675	58524	54140	53791	56457	61202	54569	53611	52883	51784	51666	59604	54556	52589	55284	54926	53169	53278	55029	54468	54202	53829	53558	0.166
25.319	52470	52911	52958	53120	53766	53802	55108	58206	53575	54130	58015	59760	54320	52661	52602	51603	52122	58785	55507	53132	54973	56321	53386	53537	54384	54610	54579	54034	53854	0.169
25.334	52384	52924	53023	53443	53263	53766	55808	57724	54322	54350	59777	58945	53753	52853	52941	51730	52165	57274	56161	53162	53876	57346	53347	53529	54387	54517	53930	53821	53920	0.169
25.35	52585	53455	52933	52880	53086	53474	56558	57145	53944	54619	61830	57528	53045	53109	52872	51188	51652	55651	58499	53430	53388	58979	54026	53625	54380	54723	54128	53949	53736	0.17
25.366	52454	53176	53637	53713	53302	53654	56822	56667	53812	54916	62426	56292	53181	52921	53009	51202	51524	55093	60344	53139	53488	59284	53878	53699	54645	54555	54313	54157	53850	0.169
25.382	52646	53335	53550	53731	53633	53586	58436	55494	54114	55362	62639	55055	52858	52882	52470	51584	51327	53889	61733	53665	53505	59473	54129	53337	54664	54382	54133	54101	53616	0.17
25.397	52555	53113	53321	53920	53345	53328	58782	54651	53999	56136	60938	54143	53119	52728	53138	51016	51512	53315	62368	53445	53516	58990	54217	53331	54750	54696	53987	54386	54227	0.17
25.413	53059	53295	54201	53650	52982	53475	59104	53886	53673	57712	60269	53592	52777	52839	52840	50999	51482	52594	61241	54041	53260	58613	54338	53201	55001	54911	54601	54329	54107	0.173
25.429	53077	53298	55005	54503	53785	53061	58976	53945	53712	59333	59069	53350	53172	52548	52848	51177	51384	52598	59786	54559	53298	57611	54421	53430	54664	55048	54823	54129	54213	0.173
25.445	52845	52900	55710	54477	54104	53667	58859	54269	53819	61018	57653	52881	53266	52744	52826	51351	51530	52301	58383	55170	53274	56847	54618	53596	55010	55685	54298	54221	54272	0.172
25.46	52616	53382	57164	55413	53810	53611	58397	53869	53539	63039	56510	53393	52238	52798	52258	51057	51678	51976	57574	56447	53087	55792	55146	53108	55051	56384	54791	54010	54290	0.17
25.476	52833	53793	58569	56110	54415	54083	57864	53518	54108	62572	54884	52709	52910	52746	53311	50884	51617	52191	55848	58198	53523	55139	55321	52930	55460	57044	54605	54316	54336	0.172
25.492	52837	53956	60127	56952	54055	54063	57677	53790	54810	61411	54533	52705	52632	52890	53151	51425	51048	52069	54661	60341	53032	54234	56110	53033	56098	58529	54761	54520	54658	0.172
25.508	53064	53892	61361	57560	54296	54528	56536	52990	55565	60446	53603	52652	52588	52871	52991	51257	51699	52239	53223	62484	53352	53832	56002	53379	56616	59808	55116	54421	54467	0.173
25.524	52697	54428	61133	58414	54248	55351	56100	53668	56676	59549	53226	52720	52330	53000	52903	51617	51292	51868	53095	62366	53233	53197	57617	53424	57980	60952	55265	54527	54237	0.171
25.539	53472	55562	61073	59874	54836	55839	56087	53428	58408	58468	53218	53054	52652	52954	52948	51444	51753	51900	52629	61496	53266	53054	58002	53611	58957	61549	55773	54801	54214	0.176
25.555	53148	56665	59562	59685	55198	56931	55310	53327	60176	57085	52681	53228	52708	53249	53365	51445	51412	52255	52362	59941	54073	52895	58851	53428	59526	60996	56437	54981	54357	0.174
25.571	53340	57812	59549	59425	55700	57879	54781	53623	61955	55151	52688	52811	52994	53153	53427	51710	51286	51594	52418	59073	54397	53075	58786	53379	60153	61037	57262	54619	54542	0.175
25.587	53945	59405	58662	58564	56132	58622	54973	53657	62609	54290	52635	52603	52906	53187	53435	51925	51408	51807	52418	57774	55050	52824	58335	53929	59881	60758	58610	55488	54974	0.179
25.602	54100	61069	57701	58465	56970	60081	54772	53826	62247	53517	52536	52928	53408	53401	53796	51862	52015	51776	52145	56057	56380	52867	58652	54562	60049	60120	60013	55512	55150	0.18
25.618	55060	60780	57348	58082	58136	60497	54849	54304	61194	53333	52878	52781	52615	53794	54913	52335	51790	51764	52136	54918	57931	53103	57926	54729	60127	59440	60776	55375	55607	0.186
25.634	56845	60602	57319	57820	59303	61310	54392	54946	60056	53177	52483	52842	53287	54079	55304	52665	52363	51786	52017	53411	59987	53271	57257	55176	59445	59129	61805	56079	55817	0.197
25.65	57982	60094	56992	57452	60445	61316	54834	55903	58883	52889	52624	53004	53657	54691	56520	53166	52598	52058	52028	53146	62225	53084	56556	56184	59394	58506	61408	57640	56732	0.204
25.665	59317	59524	57745	57594	62082	61775	54713	57253	58023	52699	52747	52672	54003	55745	58836	53975	53329	52247	51986	52837	62281	53144	55778	57245	58674	58336	61124	58232	57904	0.212
25.681	60376	59316	58621	57940	63492	62284	54881	59042	57058	52986	52863	53604	54780	57162	61281	54890	54347	52325	52176	52532	62001	53297	54881	58271	58720	57953	61339	59472	59125	0.219
25.697	60843	58044	60966	59160	63705	63111	55349	61339	55832	53388	53158	53872	55638	59462	63836	57334	55105	52389	51814	52664	60848	53696	54393	59434	58764	58930	60588	61302	61203	0.222
25.713	60573	57609	64563	60963	65109	63152	55689	62503	54274	53298	53205	54133	56871	61881	66960	59985	57867	52817	51982	52520	59607	53689	54274	60211	58674	59672	60393	62203	62219	0.22
25.729	60066	57555	70043	63735	66439	64283	56124	63550	53985	53028	53263	54700	59048	64859	68390	63333	60445	53356	52107	51927	58262	54304	54561	61062	58610	60833	59158	61915	62358	0.217
25.744	59388	57597	79541	66141	69295	65098	56938	63041	53883	53305	53259	55258	61219	67275	67820	66150	64102	53517	52630	52210	56926	54906	54651	61577	58759	62902	59360	61751	61538	0.213
25.76	59145	58400	92967	69912	70366	65548	58640	62398	53956	53654	54005	56336	64501	68213	66691	67235	66829	54604	52846	52478	56013	55987	55052	61942	59546	66403	59162	61524	61360	0.211
25.776	57965	59548	111044	74955	72394	65500	60382	62555	54379	53494	54153	58273	66604	67725	65687	66768	67771	55754	52513	52560	54831	57906	55726	61997	60933	73338	59494	60921	61242	0.204
25.792	57413	62409	133048	80425	74295	64717	61989	62376	54517	53809	55437	60883	67667	66860	64853	65413	66666	57751	53112	52404	54253	59401	57626	61924	61726	83133	60017	60851	60299	0.2
25.807	58070	66150	155766	86460	76181	64697	63981	61764	55264	54687	56860	64176	67468	65014	62885	63745	64957	59914	53887	53063	53498	61165	59375	62320	63364	98492	61645	60432	60558	0.205
25.823	58293	73238	167959	94138	78216	64486	66552	62284	55434	55473	58592	66305	66684	64499	61421	62683	63879	62966	54430	53297	53527	63633	61018	62138	66545	118413	65259	60999	60812	0.206
25.839	59236	83523	161870	102724	80846	64583	68683	62272	56578	56742	60560	67231	65426	63131	60098	61464	62279	66046	55501	53803	54051	64724	62312	62456	70878	141038	69090	61127	61011	0.212
25.855	61937	99922	145854	112236	82988	64883	70507	63958	58211	58561	63304	67323	63995	61932	61044	60216	60783	67352	57177	53980	54512	66004	62750	62243	77850	153950	75571	63219	62339	0.229
25.87	64924	120423	133590	124436	85721	64749	71480	65108	59842	60061	65588	66142	63188	62265	61828	59452	59269	66857	59448	54634	54914	67294	62012	63047	88802	150638	85935	64604	63880	0.248
25.886	72441	143971	125121	139285	89045	66219	71547	65369	62576	63380	67032	65753	63283	64002	65365	60427	58515	65474	62327	55934	56013	68380	61907	63854	103919	139816	99420	66772	65549	0.295
25.902	84365	166209	111180	155291	92963	67207	71707	65093	63726	65237	66167	65074	63983	67391	70462	63451	58982	64112	65690	57704	58097	68470	61681	63976	119007	131793	118101	70244	68758	0.371
25.918	101550	174910	95321	172058	96959	68749	71138	64440	65620	66226	65834	64154	66992	72377	76824	68878	61742	63294	66035	60039	60475	67945	61196	65807	131452	125461	140827	76704	74143	0.479
25.934	125872	163612	82429	182803	103622	71153	70328	63889	64772	65851	65311	64336	70899	79480	84321	77084	65709	62585	66093	62919	62489	66681	61121	67819	137705	113018	161187	86266	84261	0.633
25.949	154765	147288	76185	182158	108953	73420	69359	63066	64391	65448	64914	66227	78331	86313	88573	85031	72952	61944	65139	65204	64505	65228	61453	70041	141669	99493	165200	102472	97799	0.815
25.965	179046	135069	73581	175250	116058	76389	68904	62593	63890	65047	65510	69734	84994	90989	88617	89546	81450	63189	63982	65211	63891	62810	61849	73669	146939	89262	153304	124018	119104	0.968
25.981	184091	124806	74922	166561	123391	79879	67929	61976	63857	64730	66085	75451	90854	89353	84436	89168	87983	65311	63628	64589	63030	61411	62531	77883	151205	83411	140577	150592	146307	1
25.997	168126	107922	80215	157488	129497	84464	68381	60966	63258	65600	69546	82675	91929	85475	80936	85054	89092	70870	64010	64350	62239	60541	63692	82156	154038	81667	132067	174053	171105	0.899
26.012	151122	91296	88667	145162	133788	89841	69301	61019	63013	67447	74061	90874	88420	81220	77437	80339	85533	79220	64255	64368	61384	58633	66093	87686	155121	83191	122228	175119	178599	0.792
26.028	140752	79161	101665	130954	135791	96250	70315	62113	63741	69369	81673	95409	84006	78102	73147	76649	81468	88904	65713	64007	60867	57974	67073	93955	154442	87818	107844	159364	164332	0.726
26.044	128643	70514	116231	116239	135891	104141	71061	62512	65446	74940	90479	94276	80165	72513	68052	72368	77314	94120	70662	64954	60346	57878	68296	101122	149914	97813	93310	145507	147607	0.65
26.06	108890	66290	132539	103401	136756	112071	73624	64741	68385	81849	97533	90206	75789	67867	62768	66309	73324	93218	78969	66157	60046	57893	69260	110637	142245	109570	83010	137783	138959	0.525
26.075	89585	65130	143517	92865	136910	120582	76662	66321	72891	89635	99023	85134	70270	63037	60004	61433	68632	87668	89070	70077	60072	57722	70900	121846	134028	124240	77173	126460	129462	0.403
26.091	77078	66267	143146	84685	134766	126837	80445	70268	79496	96635	95693	81303	65299	59667	57394	58302	62973	83332	98028	77612	62197	58381	72603	133287	124929	136832	75055	108153	111459	0.325
26.107	69340	69413	134105	77574	130615	133528	85445	73937	84988	99430	90543	75699	61214	57417	56546	55431	59104	79212	100257	87279	65524	59927	75541	143998	115509	142220	74231	92036	94653	0.276
26.123	64818	73346	126378	72358	122396	137796	92343	79241	89619	98671	86222	69979	58372	56300	55451	54247	56364	74501	95527	97661	71321	61826	79487	149703	105783	139580	75733	80584	81614	0.247
26.138	63000	81915	119154	67465	110646	142069	98211	84261	93214	95579	80931	64649	56700	55467	54874	54049	55179	68130	89386	103744	79295	64499	84528	151197	97116	132038	77874	73807	74439	0.236
26.154	62919	94224	109217	63674	100711	145785	105108	89309	96827	90162	75187	60880	56052	55179	55282	53593	53944	62750	84612	102525	89499	68726	91700	149303	89543	125023	82974	70619	69936	0.235
26.17	63611	108281	95016	61318	93226	147315	112214	93761	97074	85172	68796	57972	55160	54970	54640	53062	53703	58791	80739	96458	99159	74870	98698	144760	83220	116575	90824	68956	67767	0.24
26.186	66076	126299	83104	59328	86045	143713	120631	98545	95305	79210	63786	57053	54820	54824	55225	53689	53380	56536	73777	91045	104362	83431	108253	137283	77981	104462	101399	68065	67769	0.255
26.202	70500	142418	74661	57802	79331	133922	128854	101150	90634	73091	60848	56429	54684	55106	55379	53396	53291	55388	67290	85333	104168	91957	120563	127752	74482	92823	115025	69536	67810	0.283
26.217	78201	150145	68061	56599	74147	120832	135995	105334	86198	67819	58982	56415	55244	54931	56214	53907	53208	54656	61570	80388	100013	100340	136061	118049	71812	82901	129329	71530	69733	0.332
26.233	89744	144095	63891	56234	70152	108143	142994	107234	82238	63555	57403	55793	55694	55428	56849	54148	53546	54422	57747	73074	93936	106022	152892	108499	68685	75140	140914	74285	72800	0.404
26.249	105632	133246	60557	55261	67672	97841	144181	108870	77672	61474	57820	56654	56443	57105	58912	54824	54193	53974	56821	66569	88027	108327	166153	99010	66180	69644	142437	80693	78148	0.505
26.265	124393	122565	58280	54689	65353	88457	140868	112330	74938	59844	57633	57158	57260	58332	61391	56317	54915	54220	55371	61596	82146	110273	166278	91316	64267	65919	132866	90317	87471	0.623
26.28	142375	113484	56889	54568	64742	78277	128954	117327	73288	60025	58061	58442	59492	62093	65489	58448	56082	54549	54998	58546	76259	112771	153013	85114	63257	62889	122931	104798	102236	0.737
26.296	152350	101270	55686	54558	63478	70948	116883	123014	74337	60479	59359	60253	62679	66521	72756	62206	57594	54921	55503	56923	70877	118783	139901	80384	61703	60527	113827	122983	118992	0.8
26.312	147938	88080	55259	53848	62005	64832	105620	126142	77933	61756	61903	63911	68292	73871	81076	69037	60831	55920	55100	56546	66640	129204	128582	76380	60488	59019	104682	139434	137922	0.772
26.328	136614	75538	54648	53826	60675	61484	95845	126350	83409	64861	65584	69608	75821	82536	91071	78938	66630	57076	56497	56533	65989	140575	116634	73566	59379	57861	92491	147241	148367	0.7
26.343	126777	67948	53962	53745	59815	58565	85508	119156	92247	70218	71235	78272	86042	93856	99729	91487	75031	59816	57546	56522	67744	141890	102425	70950	58640	57255	80818	139642	144275	0.638
26.359	117061	62378	53663	53668	58811	57016	75358	108711	101665	77252	79541	89084	97440	101341	101759	101704	87077	64699	58808	58100	73026	132911	88033	68468	58298	56592	72355	127591	131599	0.577
26.375	104596	59306	53343	53620	58168	56231	67914	99613	109499	86762	90697	101684	105334	102944	97254	103915	98857	73340	62791	60642	83940	119101	77324	66741	58120	55592	65796	118810	122459	0.498
26.391	89565	56928	53132	54424	57210	55475	62604	91224	112871	98367	102944	109627	104223	97286	90667	97808	103404	86437	69736	65206	99451	109452	69841	64487	58313	55748	61425	110899	113794	0.403
26.407	77808	56247	52375	54407	56980	54846	59306	83415	110521	108922	111364	106158	97113	91327	85689	90979	99661	100353	80480	73097	115466	101893	64761	63932	58047	55064	59366	98605	102277	0.329
26.422	68777	54951	52459	55961	56683	54173	56833	74187	102608	112562	108411	97626	90750	86505	80388	85681	92431	108893	95556	85235	122527	92815	62211	61440	58456	55458	58036	85162	88647	0.272
26.438	63851	54515	52801	57135	56340	53809	56182	67040	94949	107907	100215	92395	85687	81571	73711	80616	86543	107291	109940	101000	116469	81377	60471	60272	59230	54228	56649	74721	77031	0.241
26.454	59438	53798	52814	59374	55841	53591	55331	61356	88400	99683	93294	87920	79830	74054	67196	73366	81867	97602	114713	114475	106070	71698	58989	59658	59649	54494	56361	67178	69135	0.213
26.47	57167	53624	52999	61437	55817	53225	54708	57974	80663	92824	88592	81119	72837	67392	61509	65468	75838	90948	106452	117061	99605	64832	57446	56996	59783	54540	56012	62663	63670	0.199
26.485	55967	53335	52399	64285	55409	53095	53851	56178	72724	87000	82719	72111	65275	61229	58005	59933	67773	86534	95574	107851	93998	60500	56248	56208	61430	54464	55926	59602	60070	0.191
26.501	55422	52742	53128	65282	54979	53062	53075	55185	65033	79111	74064	65188	60381	57577	55539	55615	61291	80480	89913	98106	85822	58441	55136	55067	62527	55191	54947	58342	58025	0.188
26.517	54860	52720	53196	65314	54924	52714	52876	54417	59913	70777	66210	60610	56628	55536	54470	53486	56888	71204	86763	92319	74520	56213	54819	54113	63332	55072	54922	56940	56978	0.184
26.533	54038	53079	53449	65097	55051	52487	53091	54110	57142	63226	61033	57045	54597	54473	53803	52851	54490	63816	78621	87103	65573	55500	54272	53350	63612	55428	54661	56600	56632	0.179
26.548	53612	52836	53602	64333	54112	52399	52959	53306	55559	59152	57818	55098	53888	54000	53857	52044	52880	58257	69446	78765	60224	54880	53074	52905	63900	55542	54623	56121	55760	0.176
26.564	53027	52770	54337	63604	54399	52164	52556	52945	54224	56891	56192	53850	53393	53187	53581	52112	52606	54811	61593	68823	56380	53663	52371	52988	63215	56495	54849	55604	55650	0.173
26.58	52869	52908	55524	62631	53979	52346	52150	52952	53705	54801	54730	53985	53088	53747	53643	52404	52208	53820	57616	61288	54720	52679	52067	51980	62040	57301	54629	55469	55403	0.172
26.596	52867	53198	57456	61376	53923	52056	52121	52371	53143	54347	54357	53173	52506	52888	53256	51769	52412	52844	55198	56822	53827	52985	52107	52438	60587	58676	54745	54984	54614	0.172
26.612	52410	53139	59896	59910	54302	52256	52114	52643	52720	53970	53310	52807	52821	53044	52718	51493	51950	52272	54275	54580	52963	52525	51761	52121	59342	60789	55183	54540	54228	0.169
26.627	52587	53479	63645	58656	53850	51806	52052	52194	52818	53968	53108	52576	52558	52673	53067	51335	52061	51665	53082	53593	52832	52001	51855	51243	57486	63115	54903	54039	54310	0.17
26.643	52411	53857	67752	57963	54483	51568	52104	52134	52217	53532	53093	52110	52400	52803	52636	51287	52180	52048	52755	53464	52167	51746	51845	51960	56440	65590	55517	54523	54120	0.169
26.659	52122	54484	70373	57989	54088	52335	51876	52018	52325	53087	52457	52134	52563	52684	53292	51377	51409	51200	52215	53129	51932	51900	51549	51410	56371	67595	56475	54816	54177	0.167
26.675	52411	55675	70683	57262	54203	51778	51952	51587	52463	52648	52258	52167	52358	53547	53536	51635	51617	51680	52252	52986	52023	51659	51440	51634	55245	68361	57115	54844	54529	0.169
26.69	52355	57632	68886	58063	54241	52429	51952	51539	52511	52218	52029	52405	52816	53622	54662	52286	51384	51402	52006	53197	52221	51699	51058	52030	55291	67110	58282	54248	54454	0.168
26.706	52762	59851	67517	58983	54517	52535	51657	51666	52244	52655	52132	52227	52947	53725	55023	52631	51514	51788	51798	52589	51900	51127	51001	51491	54615	65536	60409	54957	55123	0.171
26.722	52898	64012	66367	59500	54946	52047	52294	51643	52185	52395	51967	52514	53534	54982	55748	52993	52955	51650	51110	52062	51208	51394	50962	51782	55209	64286	62278	55383	55029	0.172
26.738	53705	67505	64572	59868	54796	52366	51786	50947	52246	52152	51905	52393	53611	55949	55695	54361	53086	51533	50805	52004	51573	51303	51134	51799	55275	62841	65515	55400	55024	0.177
26.753	54020	70577	62968	59647	55578	52918	51915	51584	52292	51783	51860	52428	54807	55581	55379	55208	54345	51719	50976	51666	51404	51091	51414	51887	56467	61226	68653	56150	55533	0.179
26.769	54959	70783	60795	58911	56088	53042	51434	51728	52580	51790	52364	53241	55343	55671	54668	54327	54604	51796	50842	51760	51329	50712	51075	52576	57184	59538	70423	56431	55617	0.185
26.785	55751	69357	60757	58034	56896	52830	52061	51803	52254	51928	52505	53642	55712	55397	54710	53722	54253	52215	51303	51538	51402	50667	51218	52947	58809	58886	69733	57667	57069	0.19
26.801	58743	67766	60836	57556	56833	53265	52218	51947	52433	52069	52656	54064	55441	54813	54256	53638	53774	53126	51227	51094	51295	51200	51187	53343	59265	58988	67492	59461	58504	0.209
26.816	61716	66690	61554	56209	56688	53425	52471	51984	52315	52074	52962	55525	55165	54756	53413	53622	53500	53204	51746	51313	51724	51084	51376	53956	58757	59362	65834	62059	60161	0.228
26.832	65059	64634	61502	55563	56116	54224	52208	52440	52353	52131	53969	56164	54432	54242	52805	52074	53243	54506	51688	50827	51928	51260	51081	54121	58596	60893	64595	64989	63562	0.249
26.848	70217	62035	60572	54274	55884	54210	52716	52307	52528	52058	54266	55877	54269	53341	52063	51726	52518	54932	52045	51020	52221	51065	51043	54916	58171	60769	63047	68860	66845	0.281
26.864	72540	59576	58931	53417	55216	55169	52509	52514	52475	52600	54723	55628	53877	52645	52218	51306	51757	55212	52458	51205	51900	50942	51216	54705	57236	60804	60789	72049	71056	0.296
26.88	72039	58161	57954	53066	54605	55146	52748	52593	52714	53320	55911	55419	52823	52005	51537	50598	50525	54464	53335	51568	51326	51273	51388	55755	56432	59988	58392	71749	73052	0.293
26.895	69816	57632	56828	52290	53827	55606	53488	52975	52653	54235	56182	54758	52214	51985	51727	50106	50571	54297	54539	51838	51380	51380	51600	55054	55675	59073	57729	69695	71015	0.279
26.911	68076	58231	56457	52235	52771	55638	53838	53209	53472	55399	55955	53939	52089	51286	50902	50124	49991	53258	55339	52475	51400	51195	52595	54772	55240	58330	57456	67674	68068	0.268
26.927	66682	59244	54792	51423	52213	54986	54360	53224	53947	55675	55084	53218	51979	50904	51331	49436	50039	53056	55705	52997	51296	51850	52816	54101	54530	57211	57333	65661	66755	0.259
26.943	63783	59749	53043	51528	51907	54821	54085	53663	54191	55813	54579	52648	50860	50993	51137	49564	50120	52831	55291	54584	52169	51953	53361	54393	54011	55592	58156	64030	65713	0.241
26.958	61110	61151	52283	51270	51855	54155	54493	54046	54999	55390	54192	51780	50922	50948	51024	49749	49769	51630	54350	55013	52712	52236	53670	54128	53361	55062	59513	61540	63204	0.224
26.974	59483	60477	51617	50936	51340	53664	55378	54450	55654	55184	53396	51109	50993	51012	50902	49556	49720	51014	53717	55328	53395	52536	54174	53151	53304	54565	60507	59333	61081	0.213
26.99	58731	59131	51527	51469	51041	52943	54845	54928	55435	54533	52291	51161	50462	50629	50804	48865	49516	50859	53467	55589	54545	53345	54854	53094	52661	53310	60990	58370	58705	0.209
27.006	58535	58045	51041	50845	51499	52655	55060	54786	54922	53541	51892	51303	51040	50803	50998	49556	49778	50203	52946	54619	54838	54229	55254	52352	52920	52865	59786	57348	57629	0.208
27.021	59941	57072	51328	51020	51159	52478	54873	54721	54991	53203	51953	50543	50706	50493	50683	49632	49622	50492	51852	53981	55521	54970	55310	52603	52730	52872	58788	57488	57588	0.216
27.037	61063	55977	51199	51040	50980	51679	54923	54919	53897	52728	51233	50738	50515	51163	51005	49322	49437	50340	51466	53383	55392	55439	54693	51976	52914	52853	58089	57956	58398	0.223
27.053	61252	54437	51283	51343	50838	51390	53965	54448	53557	51540	51376	51002	51079	50918	50821	49591	49209	50010	51096	52720	54832	55797	54604	52078	52095	52395	57139	59708	59452	0.225
27.069	59509	53765	50644	51119	50663	51424	53566	54175	53317	51635	51089	51039	50790	50514	50674	49101	49200	50307	50811	52521	53976	55157	54522	51556	52239	52026	56169	60883	60781	0.214
27.085	58599	52489	50805	50458	50921	51282	53438	53218	52351	51426	50902	50828	50347	50613	50680	49152	49233	49836	50305	51249	53196	55011	53737	51113	52272	51863	54984	60778	60957	0.208
27.1	57637	51899	50417	50926	51306	50852	52814	52849	51539	50905	50552	50381	50617	50567	50263	49041	49346	49987	49928	50822	52776	54184	53181	51199	52353	51779	54546	59614	60493	0.202
27.116	56650	51636	50470	50769	50671	50970	52049	52332	51267	50732	50944	50756	50963	50523	50719	48930	49495	49715	50469	49975	51739	53573	52155	51316	51857	51770	53145	58353	58801	0.196
27.132	55667	51050	50831	50707	50519	50842	51675	52269	50958	50700	50653	50500	50563	50509	50395	49577	49094	49577	50412	50551	51404	52680	51884	50685	51594	51864	52730	58068	57958	0.189
27.148	53673	50949	50626	50868	50706	51063	51435	51723	51272	50576	50258	51016	50261	50670	50300	48784	49019	49520	49772	50238	51045	52326	51831	50303	51328	51709	52378	57088	57326	0.177
27.163	52476	50862	50450	50507	50915	50832	51216	51192	50708	50637	50671	50606	50690	50075	50529	49086	49005	49790	50044	50164	50410	51470	51725	50590	51762	51845	52015	56290	56095	0.169
27.179	52112	50477	50325	50699	50800	51016	51010	51234	50862	50920	50395	50955	49897	50332	50109	49030	49112	49748	50335	50125	50188	50895	51397	50396	52039	51893	51419	55161	55111	0.167
27.195	51619	50324	50736	50518	50707	50596	50791	51176	50753	50577	50267	50565	50562	50350	50443	49167	49119	49566	49997	49760	50410	50682	51206	49834	51369	51912	51904	53814	53813	0.164
27.211	50717	50766	50288	50619	50427	50897	50959	50461	50878	50575	50514	50723	50336	50375	50617	49399	49066	49470	49841	49859	50393	50182	51016	50307	51731	51850	52112	53305	53388	0.158
27.226	51106	50293	50286	50892	50406	50697	50253	50881	50499	50637	50403	50086	50278	50550	50387	48920	48998	49496	49892	49423	50187	50834	50960	50045	51516	51486	51748	52759	53196	0.161
27.242	51470	50508	50077	50266	50742	50970	50801	50453	50215	50526	50303	50452	50955	50158	50230	48894	48759	49531	49730	49803	50236	50289	50470	50196	51242	51730	51940	52233	52604	0.163
27.258	50830	50578	49925	50667	50422	50618	50837	50578	50572	49888	50187	50764	50307	50482	50442	48839	49044	49325	50149	49930	49553	50206	50235	50218	51851	51505	51646	52425	52216	0.159
27.274	50365	50511	50387	50300	50175	50667	50394	50503	50368	50680	50431	50328	50216	50395	50425	48667	49044	49011	49647	50047	49635	50022	50733	49745	51592	51416	51973	51530	51932	0.156
27.29	50873	50347	49928	50129	50688	50618	50526	50367	50185	50382	50411	50192	50483	50255	50374	49193	49045	49714	49927	49810	50039	49935	50261	49977	52039	51488	51339	51862	52147	0.159
27.305	50612	50795	50207	50238	50377	50352	50605	50350	50352	50059	50115	50050	50123	50041	50376	48444	48691	49223	49694	49589	50039	49774	50253	50048	51574	51665	51786	52077	51562	0.157
27.321	50226	50238	50465	50482	50669	50547	50219	50322	50213	50174	50223	50299	50072	50052	50557	48986	48964	49681	49737	49618	49464	50071	49765	49777	51090	51253	51379	52106	51584	0.155
27.337	49817	50127	50077	50471	50606	50528	50600	50576	50060	50486	50081	50521	50048	50646	50529	48448	48683	49410	49774	49753	49598	50219	50085	49803	51559	51221	52043	51869	51795	0.152
27.353	50217	50301	50066	50374	50132	50298	50411	50139	50104	50217	50061	50202	50262	50177	49899	49183	48973	49235	49617	49602	49561	49654	49646	50084	51671	51589	51694	51955	51469	0.155
27.368	50320	50368	50091	49952	50676	50682	50694	50060	49956	50343	50305	50407	50046	50609	50233	48898	48763	49429	49648	49764	49530	50014	49691	49752	51429	51651	51346	51887	51539	0.156
27.384	50734	50155	49975	50318	50040	50590	50286	50471	50303	50094	50060	50531	50179	50385	49906	48523	48829	49398	49636	49513	49751	49781	49746	50072	51410	51445	51204	51668	51172	0.158
27.4	50559	50123	50054	49902	50188	50413	50459	50553	50220	50096	49622	50266	49702	50411	50062	49105	49346	49448	49860	49375	49547	49892	50021	50460	51484	51575	51611	51265	51277	0.157
27.416	50383	50230	50368	50209	50551	49964	50560	50067	50353	50279	50145	50003	50000	50072	50039	48794	48916	49135	49053	49494	50130	49739	49411	50362	51521	51362	51731	51649	51734	0.156
27.431	49874	50114	49665	50206	50167	50267	50144	50444	49752	50458	49989	49819	50044	50506	50410	48784	49250	49679	49766	49385	49801	49783	49724	50261	51046	51371	51094	51392	51680	0.153
27.447	49964	49956	50117	50436	50414	50060	50422	50593	50356	49780	49916	50162	50241	50163	50180	48705	48981	49428	49417	49677	49821	49515	49337	49669	50888	51003	51356	51348	51292	0.153
27.463	50229	50179	50078	49895	50484	50025	50243	50078	50590	50211	49948	50023	49975	50007	49833	49104	48633	49400	49274	49436	49779	49741	49663	50357	51816	51211	51296	51270	51509	0.155
27.479	50510	49930	50205	50217	50238	50223	50699	50062	49772	50211	50050	49810	50498	50042	50074	48719	48324	49595	49211	49624	49281	49706	50342	49557	51485	51179	51489	51169	51562	0.157
27.494	50362	49732	50047	50275	49960	49815	50376	50265	50271	49875	50004	50489	49909	50212	49815	48647	48975	49063	49209	49636	49498	49835	50111	49779	51133	51320	50861	51450	51342	0.156
27.51	49926	49990	50093	49602	50363	50018	50045	49935	50201	50091	49941	49973	49691	50102	49921	48649	48489	49172	49488	49339	49282	49856	49275	49824	51564	51460	51201	51467	51414	0.153
27.526	50034	49741	50064	50045	49862	50474	49848	50474	49853	50116	49976	50110	50055	49847	49688	48481	48841	49466	48901	49101	49404	49618	49778	49879	50853	50790	51196	51207	51595	0.154
27.542	50135	49908	50114	50421	50157	49785	50334	49849	49963	49893	50438	49811	49835	50227	49744	48257	48864	49390	49281	49572	49660	49369	50039	50194	51355	51296	50983	51165	51451	0.154
27.558	50167	50008	50280	50279	50291	50080	50358	50201	50105	49625	50023	50025	49900	49936	50235	48374	48826	48979	49233	49643	49471	49274	49493	49674	51520	51157	51115	51526	51278	0.155
27.573	50139	49684	50043	50429	50545	49817	50209	50027	49975	49617	49942	49606	49936	49719	50558	48328	48779	49184	49604	49186	49397	49852	49633	49624	51476	51388	51209	51393	51523	0.155
27.589	50158	50384	49873	50101	50360	50096	50237	50148	50197	50501	49858	50296	49529	50681	50066	48773	49072	49570	48832	49034	49676	49927	49682	49783	51228	51285	51408	51658	51334	0.155
27.605	49951	49984	49876	50521	50431	50094	50016	50533	49487	49867	49719	49812	49806	49919	50120	48647	48642	49239	49374	49051	49447	49447	49386	49679	51566	51053	50825	51294	51788	0.153
27.621	50011	50048	49711	50282	50320	50104	49760	49748	49927	50092	49904	49872	49881	50389	50100	48751	49106	49331	49478	48912	49444	49400	49735	49152	51527	50977	51336	51269	50863	0.154
27.636	49957	49618	49906	50234	50404	49894	50196	50308	49745	49944	50380	50330	49734	50260	50354	48656	48529	49062	49352	48758	49475	49541	49684	49775	51648	51278	51170	51559	51263	0.153
27.652	49743	49941	50087	50377	50073	50049	49924	49993	49708	50173	50259	49542	49720	49874	50184	48605	48754	49059	49396	49349	49250	49333	49425	49381	51416	51465	51196	51600	51227	0.152
27.668	49982	49878	50274	50243	50379	50208	50151	49904	49945	49677	49872	49529	49736	50365	50026	48396	48856	48974	49472	49156	49063	49563	49256	49321	51557	51375	51116	51281	51232	0.154
27.684	49986	50507	50360	50130	50025	50081	49694	50078	49811	49664	50013	50114	49633	50047	50120	48431	48547	49243	49472	49305	49607	49259	49360	49417	51442	51282	51117	51465	51272	0.154
27.699	49981	49625	50259	50060	49802	50211	49875	49793	50234	49660	50111	49626	50185	49767	49918	48528	48630	49605	49204	49099	49341	49611	49097	49524	51539	51304	51152	50950	51111	0.154
27.715	50263	49862	50325	50381	50473	49808	50098	49832	50654	49878	49901	49367	49776	50059	49793	48704	48741	49192	49547	49199	49550	49436	49660	49644	51400	51391	51210	51384	51245	0.155
27.731	49761	49844	50501	49703	49938	50133	50162	49947	49888	49601	50028	50371	49897	49633	49848	48656	48941	49336	49175	49111	49180	49161	49520	49408	51105	51351	51369	51276	51005	0.152
27.747	49979	49899	50461	49646	50447	50004	49897	49924	49742	49848	49859	49712	49886	50382	49773	48969	48303	49231	48748	48906	49346	49334	49551	49558	51636	51261	50960	51503	51297	0.153
27.763	49471	50008	50033	49917	50215	50070	50123	49626	49656	49542	49772	49845	49723	50213	49956	48697	48408	49040	48934	49282	49531	49531	49032	49804	50918	50854	51363	51509	51183	0.15
27.778	49972	50267	50485	49884	50165	49997	50256	49919	49830	49582	49793	49807	49892	50106	50495	48585	48665	48953	49127	49289	49414	49381	49515	49650	50944	51156	51406	51250	50880	0.153
27.794	49961	50227	50356	50558	50212	50252	50367	49772	49855	49875	50192	49958	49724	49400	49993	48833	48291	49108	48745	49159	49272	49609	49385	49296	51218	51604	51273	50932	51162	0.153
27.81	49893	50268	50553	50301	50010	50187	50040	49824	49973	50152	49603	49750	50068	49878	50039	48459	48686	48967	48888	49323	49282	48924	49619	49534	50786	50900	51335	51307	51109	0.153
27.826	50093	50386	50288	50038	49763	49978	49801	49853	50086	50032	49455	49613	49622	50072	50178	48609	48605	48866	48973	49339	48814	49675	49339	49554	50843	51547	51414	51371	51195	0.154
27.841	50072	50398	50898	50167	49984	49554	49575	49485	49649	49350	50167	49893	49736	50218	49596	48343	48849	48715	48936	49017	49026	49305	49538	49379	51190	51097	51374	51413	51403	0.154
27.857	50159	50114	49968	50379	50686	50008	50049	49908	49943	50129	49600	50189	49466	49872	49778	48526	48712	48712	48791	48829	49078	49117	49291	49841	51211	51105	51929	51331	51163	0.155
27.873	50545	49965	49894	50065	50510	49666	50149	49821	49908	49927	49920	49975	49794	50106	50121	48399	48497	49028	48989	49017	49205	49019	49678	49268	51070	51101	51718	51302	50706	0.157
27.889	50810	50485	49921	50656	50350	50030	49890	49999	49784	50156	49371	49747	49468	50044	50080	48416	48733	48948	49167	49451	49361	49136	49332	49235	50625	51051	51456	51627	51282	0.159
27.904	51008	50197	50079	50733	50709	49929	49847	50019	50068	49823	49228	49899	50005	49762	50104	48755	48670	49009	48919	49241	49003	49258	49170	49189	50907	51064	51711	51799	51675	0.16
27.92	50547	50136	50373	50713	50119	49896	49573	49624	49807	49640	49854	49669	49512	49690	50078	48860	48375	49271	49034	49107	49452	48941	49090	49677	50542	51166	50938	52144	51692	0.157
27.936	50882	50057	50317	51258	50416	49986	50383	49844	49728	49953	50035	49901	49637	50220	50322	48445	48575	49332	49094	49567	49556	49266	49463	48952	50960	51165	51379	51802	51609	0.159
27.952	50893	50261	49911	51659	50628	49937	49938	50161	49727	49721	49446	50009	49843	49933	49793	48502	48557	49161	48950	49030	49369	48855	49406	48892	50930	50811	51324	52032	51777	0.159
27.968	51012	50092	50152	51627	50691	49824	50274	50188	50418	49948	49926	49320	49843	50126	49922	48409	48603	48890	49020	49081	48758	49094	49337	49692	51316	51206	51482	51844	51896	0.16
27.983	50683	50259	49775	52037	50793	50587	49945	50167	49861	49728	49490	49446	49234	50047	50043	48070	48253	48966	48851	49233	49082	48928	49280	49398	51177	50778	51462	52033	51877	0.158
27.999	51057	50007	50500	52163	50938	50364	50025	49921	50104	49690	49914	49996	49759	50142	49895	48338	48252	49101	49189	49005	48986	49179	49266	49458	51646	51415	51134	51700	52052	0.16
28.015	50389	50241	50690	52241	50739	50460	50306	50237	49764	49785	49539	50199	49947	50327	49942	48400	48441	48944	48978	48879	49058	48793	50021	49775	51639	51417	51551	51824	51811	0.156
28.031	50858	49854	50673	52679	51494	50433	50099	49885	49747	49705	49735	50056	49803	50296	50155	48253	48403	48920	48976	49141	49282	48874	49082	49820	52389	51643	51278	51846	52113	0.159
28.046	51073	49886	50694	52242	51344	50226	49753	49739	49960	49444	49930	49690	50047	49794	49693	48579	48738	48467	49269	49403	49604	49171	49027	49537	52226	51400	50875	52115	51710	0.16
28.062	50941	49802	51577	52360	51552	50240	50230	49754	49982	49502	49921	50015	50188	50103	50304	48909	49073	49154	49210	48613	49257	49188	49567	49868	52642	51884	51198	52194	51529	0.16
28.078	50948	49588	51701	52392	51159	50137	49976	49724	49835	49907	50088	50127	50095	50509	50294	49027	48838	49121	49461	48861	48789	49379	49644	50963	52932	52627	51744	51832	51839	0.16
28.094	50574	49358	52730	51431	51951	50847	50200	50043	49820	50327	50159	50032	50223	50693	49922	48992	48629	49178	49040	49249	48857	49159	49331	50710	53332	52147	51014	51577	52007	0.157
28.109	50325	49603	53210	51406	51518	50680	49958	49905	49889	49844	50717	50490	50328	50907	50194	49062	49088	48969	48966	49451	49069	49231	49557	50332	53377	52903	51043	51520	51897	0.156
28.125	50054	49592	53886	51303	50982	51038	50611	50191	50148	50204	50131	50340	50631	50282	50219	48909	49301	49134	48874	49130	49444	49220	49385	50702	53465	54092	50989	51840	51691	0.154
28.141	50255	49890	54215	50982	50880	50918	50355	50147	50252	50236	50335	50737	50703	50408	50302	48818	48962	49546	49247	49468	49491	49509	49539	50485	53510	54205	51702	51748	51387	0.155
28.157	49927	50622	53297	51019	51222	51263	50281	49668	50027	50689	50723	50422	49995	50595	50125	49260	49126	49804	49914	49975	48889	49464	49486	50579	52944	54410	51309	51558	51522	0.153
28.172	49516	50226	53150	50430	50524	50697	50682	50031	50166	50623	50770	50471	50373	49945	50741	48691	49078	50036	49255	49279	49115	49257	49345	50429	52665	54603	51629	51622	51637	0.151
28.188	49853	50698	52607	49838	50447	50970	50786	49945	50348	50851	50595	50280	49903	50039	50304	48861	49105	49510	49864	49991	49488	49505	49772	50429	52288	54456	51854	51146	51173	0.153
28.204	49683	51035	52686	50306	50555	51577	51126	50305	50603	50440	50424	50398	50587	49567	49881	48795	49085	49576	49801	50602	49801	49573	49854	50748	52116	54127	51817	51140	51283	0.152
28.22	49996	51556	51700	49867	50034	51026	51131	50073	50794	51178	50535	50022	49777	49983	49752	48847	49227	49495	49985	49952	49567	49451	50556	50539	51793	53643	52145	51383	50800	0.154
28.236	49937	51951	50674	49954	49893	50815	50992	50432	50854	50738	50381	50075	49961	49491	50051	48487	48783	49552	49984	50230	49769	49494	49463	50955	51374	52919	52239	51436	51333	0.153
28.251	50132	53273	50699	49424	49605	50411	51211	51066	50450	50283	50405	50151	50025	49661	49809	48299	48406	49410	49929	50113	50049	49605	50343	50542	51532	52560	52713	51297	51380	0.154
28.267	49768	53201	50487	49495	50010	50747	51190	51054	51014	50499	50109	49845	49916	49672	49632	48319	48450	48936	49772	50221	50034	49702	50517	50021	51184	51760	53140	51558	51229	0.152
28.283	50717	54037	50127	50268	49799	50621	51296	51088	50936	50485	50030	49944	49582	49920	50019	48345	48355	48865	49638	50105	50402	49743	51005	50015	51405	51549	53952	51560	50891	0.158
28.299	51214	53315	50247	49682	49931	50076	51363	50572	50114	50107	49673	49730	49315	50063	49183	48551	48735	48688	49599	49942	50144	50518	50451	49876	50906	51530	54174	51853	51529	0.161
28.314	52025	53302	49733	49576	49949	50149	51030	50948	50644	49997	49804	49505	49370	49418	49507	48191	48146	48760	49371	50131	50379	50897	50838	50416	51131	51087	54366	51736	51728	0.166
28.33	52997	52721	49557	49706	49031	49847	51003	50616	50060	49591	49477	49550	49785	50012	49732	48228	48399	48801	49338	49865	50051	50694	50821	49467	50748	51145	54137	52460	52264	0.173
28.346	53091	52678	49922	49630	49831	49646	50754	50525	50260	49702	50052	49450	49713	49289	49811	48238	48333	49277	48997	49464	50122	50900	50627	49814	51325	51424	54282	52910	53296	0.173
28.362	53471	51848	49657	49785	49595	50141	50203	50163	50229	49506	49908	49535	49283	49590	49433	48851	48597	48852	49035	49664	50054	50415	50701	49420	50911	51220	53491	53896	53771	0.176
28.377	53562	51694	49695	49183	49502	49972	49924	50568	49824	50059	49628	49769	49555	49587	50066	48426	48763	48792	48966	49404	49268	50521	50431	49486	50828	50937	53088	54378	54457	0.176
28.393	52652	50907	49755	49945	49687	49958	50240	50354	49962	49581	49732	49552	49141	49500	49442	48360	47961	48997	49119	48772	49366	50430	50465	49607	50596	50995	53401	55100	55032	0.17
28.409	52431	50389	49774	49465	49731	49335	49428	50186	49695	49849	49608	49461	49416	49706	49534	48293	48442	48837	49185	49357	49208	50034	50131	49744	50930	51199	52261	54509	55224	0.169
28.425	52271	50343	49208	49741	49574	49519	49997	49950	49983	49897	49402	49743	49311	49594	49906	48596	48286	49204	49027	48926	49045	49657	49826	49080	50706	50576	51976	54173	53955	0.168
28.441	51845	50069	49473	49829	49820	49771	49965	50056	50055	49827	49821	49602	49475	49837	49677	48371	48040	48700	48952	49037	49539	49960	49379	49509	50601	50912	51842	53061	53937	0.165
28.456	51289	49724	49499	49696	49742	49742	50041	50256	49786	49865	50027	49634	49195	49581	49651	48516	48459	48282	49009	49025	48822	49712	49382	49834	50719	50995	51286	53670	53650	0.162
28.472	50905	49849	49917	49811	49658	49799	50292	50273	49671	50058	49624	49837	49970	49841	50174	48272	48188	49039	48817	48542	49199	49228	49222	49248	51004	50952	51443	53231	53056	0.159
28.488	50962	49987	49647	49612	50158	49905	50428	50096	50030	49955	49944	49911	49998	49549	49809	48584	48394	48981	48963	49405	49071	49690	49455	49044	50725	51060	51263	52858	52838	0.16
28.504	50779	50083	49941	49694	49723	50012	50295	50334	50049	50269	49757	49939	49708	49824	49911	48670	48662	48959	48977	48858	49105	49331	49653	49179	51254	50792	51123	52470	52245	0.159
28.519	50202	50057	49517	50000	50111	50087	50376	50369	50354	50079	50252	49959	49991	50073	49931	48601	48661	48668	48688	49261	49058	49212	49530	49333	51300	51207	50906	51983	52019	0.155
28.535	50392	50073	49905	50075	49803	50246	50260	50370	49875	49427	49649	50328	49542	50161	49957	48534	48782	49038	49259	48923	49151	49523	49507	49047	51284	51666	51483	52052	51846	0.156
28.551	50864	50114	49771	50786	49881	50177	50190	50227	50379	49797	50372	50317	49615	50129	50548	48765	48681	49442	49052	49422	49327	49416	49707	49224	51501	50888	51523	51520	51574	0.159
28.567	50358	50285	50281	50030	50260	50713	50760	50315	50218	50387	50223	50081	50362	50336	50277	49003	48638	49207	49149	49579	49432	49726	49481	49229	51343	51391	51449	51132	51641	0.156
28.582	50230	50065	50201	49889	49902	50162	50107	50087	50326	49968	50159	50440	50037	49788	50254	48514	48891	48847	49450	49528	49862	49406	49907	49349	51264	51261	51559	51923	51642	0.155
28.598	50042	49966	50121	50158	50537	50546	50057	50507	50236	49956	50076	50296	50049	50177	50480	49063	48902	49332	49519	50015	49028	49452	49833	49433	51428	51516	51213	51509	51623	0.154
28.614	49627	50118	49920	49731	49925	50160	50483	49489	50266	50333	49859	50182	50177	50018	50119	48705	48965	49637	49588	49508	49642	50218	50314	49742	51171	51553	51632	51491	51641	0.151
28.63	49709	49869	49953	50053	50467	49827	50516	50062	49941	49884	49727	50205	50341	50184	49778	48510	48748	49300	49511	49536	49519	49488	50017	49773	51195	50965	51160	51477	51267	0.152
28.646	49614	50004	49716	49362	49880	50218	49950	50240	49823	49614	50024	50166	49828	49959	50170	48595	49229	49043	49086	49546	49597	49792	49957	49702	50715	51141	51683	51040	51578	0.151
28.661	49798	49623	49794	49556	50087	50159	49582	50099	49604	49933	50174	49832	49852	50073	50227	48519	49280	49009	49582	49813	49716	49962	49755	49878	50609	51422	50779	51095	51292	0.152
28.677	49363	49745	49419	49414	49846	49837	49690	49615	50227	49692	49813	50054	49564	49954	49863	48682	48585	49171	49355	49505	49386	49352	49983	49575	50950	50890	50827	51241	51090	0.15
28.693	49675	49918	49572	49499	50046	49989	49818	49564	49579	49639	49794	49805	49698	49994	49687	48578	48680	49038	49625	49211	49829	49489	49143	49373	51031	50944	51193	51385	51117	0.152
28.709	49298	49251	49031	49419	49606	49316	49615	49127	49500	49577	49743	49627	49426	49741	49414	48353	48660	48823	49119	49116	49691	49128	49192	49406	51015	50756	51026	50621	50696	0.149
28.724	48965	49192	49604	49627	49812	49991	49716	49739	49876	50046	49803	49716	49713	49688	49251	48453	48535	49037	48731	49422	49342	49395	49642	49457	51033	50373	50872	50952	51041	0.147
28.74	49055	49454	49262	49327	49251	49302	49588	49620	49674	49581	49545	49424	49303	49515	49431	48395	48505	48580	49228	48748	48811	48811	49371	49157	50943	50912	50705	50173	50955	0.148
28.756	49571	49405	49351	49491	49823	50043	50191	49752	49476	49209	49301	49347	49531	49630	49813	48241	48780	48672	48555	48872	48855	48915	49377	49469	50930	50856	50505	51109	50750	0.151
28.772	49490	49003	49311	49548	49393	49779	49333	49413	50017	49147	49748	49057	49236	49322	49414	47760	48750	48514	49118	48978	49418	48866	48821	49107	50548	50954	50811	51063	50841	0.15
28.787	49038	48968	49198	49959	49778	49769	49962	49752	49940	49549	49317	49808	49379	49261	49978	48418	47910	48626	48874	48714	48951	49000	49292	49260	50427	50586	50417	50643	50932	0.148
28.803	49148	49101	49089	49432	49355	49572	49633	49723	49897	49552	49471	49387	49425	49729	49420	48262	48634	48972	48833	48772	48983	48827	49063	49079	50956	50601	50681	50635	50631	0.148
28.819	49413	48877	49171	49467	49220	49637	49339	49865	49752	49807	49587	49493	49350	49219	49523	48863	48359	48401	48093	48613	48650	48990	48782	48734	50528	50526	50396	50526	50361	0.15
28.835	49141	49352	49356	49134	49619	49376	49697	49461	49358	49480	49573	49398	49754	49564	49627	48408	48445	48618	48901	49318	49100	49228	49108	49081	50396	50636	50993	50312	50518	0.148
28.85	49253	49480	49406	49631	49805	49521	49604	49378	49353	49157	49258	50022	49568	49235	49459	47887	48008	48858	48557	48893	49097	49069	48993	48981	50670	50201	50549	50779	50323	0.149
28.866	49038	49630	49351	49194	49655	49323	49553	49440	49439	49816	49054	49209	49639	49594	49580	48568	47905	48602	48952	49020	48614	48959	49113	49100	50168	50526	50208	50726	50636	0.148
28.882	48990	49530	49231	49185	49444	49211	49488	49329	49460	49361	49419	49423	49671	49858	49606	47923	48022	48586	48836	48396	48852	48759	49358	49226	50999	50797	50417	50820	50729	0.147
28.898	49012	49348	49400	49407	49829	49369	50181	49744	49255	49667	49541	48960	49281	49568	49023	48154	48152	48362	48467	48536	49131	49127	49223	48748	50667	50488	50733	50463	50457	0.147
28.914	49541	49475	49188	49357	49215	49485	49244	50035	50077	49649	49235	49569	49218	49186	49258	48107	48636	48908	48746	49025	49227	48593	49063	48868	50671	50642	50866	50570	50297	0.151
28.929	49375	49328	49432	49373	49360	49495	49505	49284	49013	49661	49648	49677	49578	49771	49456	48104	48023	48461	49286	49157	49022	48885	49298	48798	50505	50691	50637	50642	50792	0.15
28.945	48785	49502	49254	49606	49547	49598	49724	49548	49753	49261	49414	49719	49565	49526	49333	48260	48459	48856	49262	49219	49024	48710	49227	48653	50499	50676	50790	50819	50625	0.146
28.961	48985	49175	49356	49278	49245	49815	49370	49360	49208	49215	49201	49512	49868	49730	49535	48250	48436	48498	48677	49224	49178	49021	48906	48615	50377	50445	50525	50781	50393	0.147
28.977	49332	49371	49311	49296	49591	49463	49441	49385	49288	49297	49152	49361	49375	49486	49590	48355	48719	48404	48881	49132	48976	49222	49305	48990	50276	50873	50635	50645	50733	0.149
28.992	49386	49109	49222	49276	49578	49131	49495	49144	49546	49101	49338	49337	49332	49585	49641	47791	47971	48757	49289	48923	48797	49346	48687	48928	50507	50578	50632	50637	50400	0.15
29.008	49066	49268	49341	49402	49494	49284	49415	49440	49301	49720	49448	49316	49213	49560	49670	48189	48147	48530	48907	48770	48694	48991	49220	49282	50351	50662	50503	50828	50725	0.148
29.024	48893	49279	49334	49371	49160	49258	49295	49593	49275	49506	49563	49705	49358	49628	49903	48466	48337	48689	48784	48654	48923	48931	49366	48694	50457	50722	50609	50378	50778	0.147
29.04	49011	49262	49339	49186	49396	49664	49696	49350	49168	49364	48826	49069	49899	49745	49738	48185	48612	48222	48553	49251	49087	48852	48717	48897	50520	49832	50527	50622	50408	0.147
29.055	48923	49024	49585	49406	49917	49051	49423	49417	49270	49352	49879	49508	49449	49656	49719	47952	48269	48893	49001	48655	49214	49053	49504	48867	50578	50838	50525	50388	50568	0.147
29.071	49031	49164	49345	49729	49349	49445	49465	49592	49567	49898	49698	49626	49478	49600	50194	48512	48633	48916	49073	48957	48685	48969	48827	49217	50398	50610	50392	50553	50733	0.148
29.087	49094	49371	49047	49528	49289	49230	49586	49155	49665	49126	49370	49543	49347	49742	49989	48047	47948	48747	48908	49600	49300	49127	49264	48871	50487	50628	50418	50553	50601	0.148
29.103	49657	49026	49793	49396	49136	49609	49661	49930	49527	49595	49601	49366	49395	49471	49487	48236	48410	48625	48592	48983	49111	49042	49206	49174	50688	50981	50935	50892	51090	0.151
29.119	49424	49482	49451	49129	49074	49548	49519	49557	49278	49611	49433	49416	49599	49274	49714	48115	48530	48379	48993	48924	49026	48898	49095	49025	50595	50170	50497	50584	50742	0.15
29.134	49287	49225	49169	49307	49455	49682	49698	49922	49298	49706	49415	49802	49380	49752	49920	48004	48357	48916	48337	48860	48865	49233	49207	48764	50417	50797	50614	50698	50664	0.149
29.15	49234	49356	49284	49516	49410	49268	49096	49290	50045	49385	49296	49531	49465	49948	49544	48282	48812	48482	48662	48769	48987	49283	49236	48785	50488	50748	50836	50612	50620	0.149
29.166	49154	49367	49314	49649	49333	49663	49581	49353	49605	49430	49919	49526	49429	49298	49542	48208	48681	48605	48778	49197	48979	49143	48903	48827	50656	50492	50885	50422	50528	0.148
29.182	49411	49274	49263	49400	49725	49442	49420	49487	49880	49627	49606	49173	49716	49631	49839	48234	48360	48946	48666	49292	49210	49229	49124	49153	50553	50290	50752	50791	50694	0.15
29.197	49223	49463	49127	49453	49328	49117	49319	49517	49536	49603	49195	49765	49317	49801	49731	48305	48633	48823	48431	48685	48895	49240	49112	49021	50752	50429	50736	50434	50544	0.149
29.213	48844	49137	49045	49157	49493	49300	49907	49700	49401	49586	49604	49506	49538	50061	49856	48004	48349	48367	48850	48825	48579	48785	49322	49343	50614	50006	50499	50312	50909	0.146
29.229	48930	49359	49160	49103	49448	49243	49466	49637	49501	49492	49229	49718	49196	49857	49866	48113	48348	48763	48999	48947	48896	49007	49018	48795	50331	50235	50778	50812	50917	0.147
29.245	49153	49485	49599	49194	50087	50010	49837	49481	49676	49692	50072	49841	49517	49340	50098	48270	48642	48267	48949	48858	48755	49010	48875	49312	50715	50566	50555	51067	50697	0.148
29.26	49060	49483	49618	49274	49249	49164	49808	49519	49603	50061	49348	49557	49298	49940	49944	48516	48192	48835	48951	49060	49085	48922	48681	48838	50085	50900	50836	50852	50904	0.148
29.276	49263	48894	49271	49542	49078	49468	49836	49460	49714	49285	49593	49548	49670	49418	49941	48076	48701	48719	48731	48862	49013	48687	49285	48793	50532	50097	50415	50491	50526	0.149
29.292	49354	49307	49049	49321	49654	49558	49324	49735	49677	49345	49666	49466	49603	49750	49844	48254	48352	48857	48968	48857	48711	49043	48789	48904	49836	50412	50255	50739	50622	0.15
29.308	48906	49094	49199	48890	49453	49528	49171	49278	49773	49485	49525	49367	49920	49760	49828	48439	48950	48832	48914	49115	48941	48989	48635	48994	50552	50866	50628	50647	50241	0.147
29.324	49368	49513	49720	49500	49634	49290	49643	49767	50113	49172	49664	49827	49644	49602	49618	48364	48558	49064	48950	49343	49147	48913	49296	48832	50595	50695	50287	50442	51120	0.15
29.339	49411	49456	49409	49673	49016	49276	49817	49281	49897	49628	49612	49966	49377	49856	49642	48071	48714	48758	48941	49022	49127	49059	49082	48652	50618	50648	50579	50618	50544	0.15
29.355	48718	49087	49195	49394	49710	49498	49715	49727	49528	49396	49874	49483	49694	49766	49789	48172	48924	49098	48946	49068	48409	48786	48854	49012	50481	50488	50791	50380	50910	0.146
29.371	49137	49077	49217	49063	49558	49684	49582	49674	49638	49731	49745	49896	49662	49746	49774	48230	49136	48617	48750	48767	48830	49234	49200	48947	50852	50370	50475	50745	50543	0.148
29.387	49080	48699	49374	49239	49423	49216	49481	49613	49150	49513	49950	49786	49668	49649	48953	48315	48676	49118	49253	49072	49170	48847	49019	48878	50718	50555	50445	50523	50424	0.148
29.402	49555	48940	49427	49239	49446	49417	49646	49502	50052	49441	49870	49784	49668	49311	49776	48083	48079	49591	49230	48624	49011	49159	49139	48981	50432	50630	50551	51057	50392	0.151
29.418	48842	49180	49408	49481	49473	49161	49372	49722	49950	49673	50031	49883	49510	49643	49965	48446	48522	48997	49096	49236	48582	48981	49249	49363	50312	50478	50742	50306	50758	0.146
29.434	49259	49277	49399	49606	49452	49225	49406	50288	49606	49694	49735	49832	49487	49678	50093	48441	48728	48986	48675	48785	49044	49473	49307	48909	50488	50288	50701	50489	50652	0.149
29.45	49135	48976	48966	49601	49169	49447	49331	49236	50021	49769	49484	49666	49496	49985	50177	48366	48912	49038	48610	49093	48947	49389	48696	49218	50648	50835	50829	50645	50594	0.148
29.465	49436	49323	48988	49385	49568	49077	49411	49998	49565	49298	49560	49689	49401	49811	49623	48802	48222	48962	48989	49056	49313	49126	49074	48900	50594	50279	50291	50946	50597	0.15
29.481	49307	49351	49041	49536	49115	49523	49691	49724	49686	49687	49802	49719	49609	49676	49979	48637	48632	48772	48691	49104	49690	49065	49065	48863	50376	50837	50498	50759	50389	0.149
29.497	48960	49656	49177	49643	49354	49586	49262	49558	50014	49711	50149	49704	49181	49669	49985	48271	48579	48302	48855	48971	49589	49348	48942	49120	50454	50589	50509	50535	50147	0.147
29.513	49131	48857	49111	49504	49816	49220	50105	49397	49800	49555	49825	49831	49915	49894	49632	48623	48465	49179	48936	48927	49557	48894	49252	48845	50363	50389	50484	51079	50594	0.148
29.528	49655	49387	49166	49720	49428	49518	49474	49645	49531	49879	49544	49563	49721	50064	50151	48812	48676	49031	49165	49168	49096	49274	49108	48939	50802	50540	50617	50942	50519	0.151
29.544	49054	49092	49125	49874	49680	49633	49791	49978	49601	49992	49950	49549	49681	49928	50290	48203	48978	48581	49201	48668	49024	49372	48931	49248	50466	50243	50649	50619	50761	0.148
29.56	49100	48715	49121	49359	49777	49432	49846	49735	49414	49695	49484	49960	49740	50198	50148	49034	49032	49209	49087	48975	49418	49344	49660	49164	50668	50422	50793	50874	51143	0.148
29.576	49175	48841	49285	49330	49855	49526	49648	49466	49732	49721	49650	49670	49683	49904	50330	48746	48868	48510	49172	48941	49325	49083	49351	49094	50464	50605	50393	50168	50120	0.148
29.592	49344	49251	49338	49439	49689	49675	49779	49506	49544	49913	49543	49518	49848	50541	50450	48577	49182	48989	49054	48917	49388	48993	49148	48941	50722	50335	50659	50634	50601	0.149
29.607	48637	48907	49092	49495	49476	49863	49761	49307	49738	49466	49631	49687	49804	50419	50612	48990	49228	48741	48908	48803	49093	48826	48781	49049	50052	50456	50438	50645	50718	0.145
29.623	48982	49079	49374	49585	49570	49651	49684	49689	50240	49725	49586	50010	49786	50258	50588	48700	49249	49090	48926	49250	49348	49274	48785	48993	50699	50671	50664	50701	51047	0.147
29.639	49178	48938	49387	49868	49812	49796	49769	49360	49538	49843	49929	49286	49648	50256	50720	48713	49200	48758	48767	48889	48896	49167	49034	49238	50463	50717	50368	50749	51211	0.148
29.655	49040	49061	48814	49310	49570	49659	50111	49747	49429	49648	49573	50099	50206	50521	50703	49293	49460	49161	49063	49115	49515	48980	49146	49101	50824	50768	50567	50555	50608	0.148
29.67	48741	49319	49674	49539	49532	49701	49757	49772	49341	49808	49619	50360	50146	50675	51454	49616	49509	49381	49201	48877	49170	49207	49160	49146	50521	50176	50395	50935	50720	0.146
29.686	49060	49028	49536	49250	50172	50148	49666	49524	49838	49807	49943	49919	50282	50857	51366	49673	49754	48809	48927	48763	49390	49121	48816	48887	50600	51054	50215	50383	51076	0.148
29.702	49493	49006	49520	49707	49757	49720	49826	49799	49513	49853	49952	49730	50488	50991	52152	49618	49664	49435	49497	49534	48813	48933	49466	49078	50812	50786	50518	50559	50473	0.15
29.718	49443	49498	49203	49435	49614	49988	49684	49755	50189	49785	49886	50054	50775	51461	52263	50066	49607	49684	49498	49192	49031	49269	49306	49255	50750	50383	50487	50893	50387	0.15
29.733	48891	49088	49841	49744	49912	49677	50034	49632	49658	49675	49819	50117	51267	51937	52954	49951	49862	49483	49100	49233	49291	49111	49169	49045	50642	50478	50842	51192	50698	0.147
29.749	48867	49504	49991	50182	50148	49630	49935	49989	49762	49560	50131	50679	51061	51962	53755	50794	50634	49824	49262	49100	49135	48992	49590	49543	50886	50464	50713	50462	50722	0.146
29.765	49012	49064	49569	50087	50124	50191	49776	49724	49546	49844	49811	50338	50895	52360	55686	50844	50520	49570	49369	49283	48744	49179	49076	48891	50934	50722	50723	51000	50643	0.147
29.781	49218	48908	49388	50204	50323	50206	49671	49927	49841	49938	50407	50183	51565	53477	58234	51607	51705	49917	49407	48912	49290	48905	49026	49215	50716	50377	50325	50884	50612	0.149
29.797	49137	49088	49812	50611	49764	50053	49861	49747	49656	49729	50233	51021	52072	54355	61280	52887	52716	49629	49680	49251	49301	48961	49638	48984	50627	50784	50376	50745	50196	0.148
29.812	49009	49475	50222	50810	50836	50347	49644	49908	49718	49939	50141	50508	52498	56466	65049	54698	54422	50549	49729	49381	49538	49188	48966	49343	50872	50607	50499	50588	50557	0.147
29.828	49316	49695	50022	50980	50654	49773	50181	49535	50074	50160	50675	50953	53834	59059	69228	57495	56621	50324	49517	49639	48861	49438	49161	49117	51114	50770	50859	50545	50727	0.149
29.844	49137	49286	50453	51354	50456	49686	50031	49588	50131	50176	50359	50976	54912	62437	72930	61385	60177	50208	49630	49238	49191	49039	49518	49300	51164	50873	50826	50668	50341	0.148
29.86	49120	49164	50685	51842	51020	49859	49956	49482	49833	50307	50423	51987	56824	66475	75188	66002	64470	50793	49924	49508	49218	49227	49186	49133	51239	51158	50564	50324	50465	0.148
29.875	49502	49547	51048	52164	51346	49820	49784	50219	50309	49922	50154	51950	59671	70924	74312	70389	69132	51546	49963	49388	49076	49123	49303	49210	51258	51308	50669	50861	50870	0.15
29.891	49343	49332	51584	52465	51187	49968	49698	49986	49714	50496	50578	52798	63981	74189	73004	73131	73342	51957	50094	49568	49228	49686	49589	49302	51459	51595	51047	50434	50502	0.149
29.907	49304	49380	52320	53010	51306	50065	49693	50020	50149	50167	51050	54101	67864	75066	70251	73941	74250	53390	50562	49446	49336	49189	49359	49459	51741	52104	51129	50774	50732	0.149
29.923	49296	49679	52493	53869	51802	50522	49925	49744	49945	50045	51259	56065	71698	73896	67708	72811	73690	54879	50532	49902	49465	49477	49557	49625	52180	52192	51101	50723	50643	0.149
29.938	49541	49454	52979	53798	52306	50617	49867	50016	49849	50622	51821	57658	73853	71896	65581	70452	71034	56764	50752	49737	49326	49578	49188	49772	53098	52924	51086	51164	51117	0.151
29.954	49262	49867	52768	53960	51905	50592	50101	50404	50369	50701	51956	60887	74816	69910	62993	68228	69094	60123	50596	49889	49468	49207	48875	49885	53546	53095	50710	50836	50929	0.149
29.97	49453	49926	52288	53698	52665	50236	50422	50136	50392	50766	52870	65105	73525	67214	59963	65785	66870	64551	51624	49818	49430	49413	49751	49423	54303	53817	51001	51374	50950	0.15
29.986	49846	50323	52148	53081	52926	51021	49972	50228	50302	50874	53375	69674	71196	65022	57570	63329	64258	70037	51580	50309	49559	49406	49929	50462	54395	53866	51536	50827	50881	0.153
30.002	49285	51126	51788	52460	53315	50873	50330	50311	51104	51006	54731	74021	69045	61748	55856	60293	61593	73164	52108	50091	50138	49390	49526	50069	54520	53692	51324	51341	51093	0.149
30.017	49879	51386	51910	51876	53062	51319	50596	50120	51178	51725	56451	75499	66503	59053	54223	57235	58448	74533	52974	50570	50042	49434	49409	50425	53999	53379	51382	51198	51205	0.153
30.033	50032	51889	51328	51547	53921	51857	50785	50359	50991	52125	59031	75120	63993	57041	53247	55430	55721	73900	54682	50712	49888	49412	49375	50874	54180	53739	52068	51399	51383	0.154
30.049	50660	52637	50847	51176	54078	51722	50478	50276	50983	52423	62760	72966	61935	54884	52628	53863	53578	71853	56382	50747	49921	49758	49337	51605	53824	52694	52734	51426	51498	0.158
30.065	50809	53000	50768	50977	53958	52186	50894	51124	51299	53176	67088	70731	58812	54208	52364	52154	52608	69436	59228	51423	49812	49603	49852	51651	53777	52806	53223	51614	51588	0.159
30.08	51647	52803	50112	50270	54587	52373	51068	50452	51837	54766	71673	69243	56605	52346	52026	51395	51892	66839	63822	51896	50509	49821	50111	52470	53515	52839	53457	51793	51975	0.164
30.096	51684	53198	49724	50280	54206	52796	51269	50900	51601	56493	76073	65942	54944	52295	51659	51241	51243	64826	68952	51663	50113	49851	50155	52541	53009	52068	54080	52843	52480	0.164
30.112	52965	53382	49562	49954	53570	53909	51293	51520	52537	58705	77086	64011	53978	52323	52221	50597	51219	62138	73930	52688	50677	50318	50252	53257	52905	51934	54440	52789	52638	0.172
30.128	53944	52811	49584	49948	52863	54361	52261	51436	53093	61831	75500	60845	53002	52186	51637	50701	50570	59016	76654	53345	50914	50127	49990	53156	52592	51718	54611	53247	52828	0.179
30.143	54457	51798	49796	49184	52727	54986	52387	52001	54469	66392	72864	58332	52913	52588	52131	50596	50878	56562	76464	55226	51475	50179	50133	53780	52599	51659	53814	54132	53903	0.182
30.159	54649	51694	49357	49498	52378	55213	52629	52427	55573	70513	70618	56909	52665	52583	52293	51152	50706	54704	73894	57147	51534	50797	50742	53602	52126	51182	53505	55375	54961	0.183
30.175	54111	51059	49646	49576	52177	55842	53122	53630	57724	75851	69074	55207	52534	52728	52591	51273	50428	53479	70504	59727	52344	50889	51163	53642	52138	51268	53010	55920	55870	0.18
30.191	53890	50844	49957	49790	51476	55193	54603	53802	60919	77679	66504	54380	53145	52900	52902	50927	51064	52983	68081	63995	52710	50856	51668	53557	51864	51262	53589	55629	55765	0.178
30.206	53499	50554	49750	49573	50660	55250	55453	55032	63753	76894	64228	54197	53512	53391	53620	51441	51226	52477	66817	69701	53629	51094	52310	53284	51884	51336	53071	55665	55745	0.176
30.222	52805	50508	49672	49892	51027	54650	56309	56448	68660	74805	61041	54318	53784	53859	54305	52148	51031	51923	63955	74969	54181	51832	53218	52917	51983	51296	52724	54998	54894	0.171
30.238	52053	50483	49349	49499	50295	53820	57542	59061	72363	73027	59130	55309	54930	55472	55627	52838	52198	52210	61384	77568	56282	52431	54968	52675	51558	51237	51841	54536	54338	0.167
30.254	51799	49798	49550	49490	50252	53381	58108	61964	76312	72167	58425	55994	56458	56447	56685	54347	52878	52188	58306	77827	58225	53885	55917	52522	51177	51457	51420	54382	54567	0.165
30.27	50757	49791	49637	49578	49870	52814	58576	65073	78273	70576	58384	58209	58659	59146	58996	56482	53556	53242	56064	75149	62036	54561	56685	52171	51578	51342	51331	53811	53427	0.158
30.285	50826	49760	49900	49309	49933	52892	58563	69598	79469	69109	59388	60115	61001	61240	61236	59694	55265	54229	55799	72323	66897	55887	57908	52412	51303	51066	51801	53376	53064	0.159
30.301	50784	49673	49418	49324	49981	52659	58299	73347	79534	67585	61313	62476	62569	62337	62548	61421	57308	56185	56118	71051	72331	58219	57681	51817	51460	51144	51500	52305	52503	0.159
30.317	50153	49914	49338	49572	50304	51657	58184	75020	79145	66587	62893	62810	63128	63617	62695	62693	59472	58892	56558	70852	77980	61001	57126	51856	51307	51060	51302	52490	51764	0.155
30.333	50005	49715	49183	49445	49705	51488	58588	77803	76985	66322	62977	63226	62797	62775	62162	61774	62104	61580	59484	69497	81831	63810	56892	51767	50997	50916	51302	51850	51777	0.154
30.348	49713	49467	49348	49643	49872	51333	58895	77798	74523	64525	62018	61478	61648	61363	60770	60253	62523	62830	61672	68544	84388	66480	56946	51748	51035	50102	51706	51113	51296	0.152
30.364	50068	49832	49439	49556	50255	51908	60300	76458	71002	62869	60891	60272	60143	60193	59863	59073	61619	62972	62641	67452	82624	68745	56460	51134	51338	50839	51317	51518	51361	0.154
30.38	49732	50032	49467	49578	49806	50751	61196	74732	67047	60660	59664	59403	59318	58789	58924	57834	60307	61513	62850	66003	79371	71132	56521	51437	51369	50680	51219	51146	51321	0.152
30.396	49994	49293	49163	49489	49811	51016	63567	72208	64066	59719	59126	58618	58269	58049	57023	56649	58332	60435	61018	63599	76773	73336	55941	51360	51270	50901	51274	51484	51443	0.154
30.411	49446	49670	49653	49686	49987	51654	64891	69604	61556	59071	58265	57604	56840	56195	55975	55279	57695	58939	59127	61291	72717	75479	55280	51385	51575	51171	51030	51209	51380	0.15
30.427	49649	49842	49388	49687	50054	51948	66774	66573	59080	57877	56976	56161	55074	54974	54626	53513	56469	57849	58951	59624	69791	76136	55514	51664	51544	50887	51070	50937	50747	0.151
30.443	50072	49694	49491	49341	50389	52287	67956	63387	57272	55655	55497	54067	53632	53647	53492	52653	54723	56357	58300	58419	65458	75236	55673	51129	51703	51145	51102	51259	51650	0.154
30.459	50014	49462	49711	49973	50147	52876	68766	60815	55244	55129	54416	53313	52879	52924	52790	51562	53493	55476	56977	57972	62076	73408	56025	51381	51175	51252	51141	51775	51461	0.154
30.475	49457	49615	50038	50008	50471	53542	68433	59172	54441	53971	53273	52543	51993	52071	52045	50393	52474	53544	55103	56674	58249	70541	58195	51205	52180	50968	51241	51433	51379	0.15
30.49	49579	49552	49553	49768	50341	54931	67333	57248	53310	52882	52390	52123	51461	51708	51852	50021	51611	52477	54183	55421	55700	67546	59773	51226	52028	51266	51090	51243	51291	0.151
30.506	49939	49366	49416	49614	50986	56498	66373	55640	53099	53317	52043	52095	51247	51196	51317	49935	50801	51551	52738	53912	54320	64601	61329	51655	51982	51396	51219	51223	51198	0.153
30.522	49751	49157	49487	50145	51164	58394	65016	53983	52596	52797	51997	51122	51335	51507	51605	49963	50411	51161	51807	52592	52860	62108	63670	51398	51929	50853	51402	51487	50836	0.152
30.538	49441	48854	49926	49834	50864	61095	63591	53226	52550	52172	52161	50888	51017	51128	51255	49477	50339	50319	51265	52521	52223	59859	65618	51887	51757	51347	51375	51151	51425	0.15
30.553	49338	49810	50011	50035	50951	63104	61411	52799	52062	51772	51169	51088	51192	51000	51610	50082	50286	50173	50959	51686	52077	57075	67151	51905	52357	51391	51289	50995	51073	0.149
30.569	49480	49893	49766	49612	51607	65306	60280	52723	51529	51808	50958	51176	50687	51404	51894	49843	49877	49989	50602	51536	51229	55339	67688	52720	52716	51357	51357	50668	50981	0.15
30.585	49175	49321	49500	50227	52293	66254	58498	52020	51557	51612	51445	50768	50872	51274	51873	49603	49977	49984	50797	51320	51411	53383	67913	52977	52681	51873	51350	50741	51427	0.148
30.601	49416	49553	49898	50154	52599	66544	56664	52113	51528	51505	50950	50568	50978	51414	51855	49948	50434	50041	50048	51266	51126	52759	67015	53898	52862	51662	51404	51379	51240	0.15
30.616	49635	49524	49340	50540	54287	66785	55341	51927	51431	51666	50762	51180	51155	51331	51822	49820	50273	49907	50350	50897	50761	51660	65681	54073	52912	51703	51255	50867	51150	0.151
30.632	49164	49285	50091	50313	55467	66236	54620	51648	51444	50999	50978	50602	51191	51618	52466	49966	50483	49700	50200	51258	50947	51684	63968	54921	53311	51410	51361	50965	50737	0.148
30.648	49607	49430	49786	50216	57396	65222	54049	51507	51583	51136	50493	50670	51061	51876	52587	50593	50670	50187	50013	50568	50679	50952	61858	55890	53863	52157	51478	50878	51394	0.151
30.664	49265	49375	49424	50834	59725	64121	53270	51575	51182	51099	50789	51294	51731	52053	52691	50266	50858	50173	50101	50607	51023	50696	59430	56999	53850	52095	51284	51214	51170	0.149
30.679	49346	49400	50074	50932	61933	62815	52679	51233	51241	50626	50682	50850	51935	52320	53737	50949	51068	50322	50218	50285	50740	50426	57833	58026	54548	52121	51500	50804	50837	0.15
30.695	49297	49389	50083	50932	64384	61192	52310	51565	51279	50778	50294	50898	51727	52781	54560	51198	51269	50248	49976	49985	50501	51056	55422	58965	54947	52439	51193	50975	51203	0.149
30.711	49083	50110	50318	51763	65219	60002	52363	51225	51341	50286	50696	50728	52467	52948	55557	51625	51876	50181	50043	49994	50653	50591	53985	60560	55297	52213	51328	51001	50909	0.148
30.727	49257	49928	50040	51763	65271	58254	51664	51246	50548	50465	50436	51062	52610	53850	58033	52554	52475	50545	49757	49964	50330	50655	53549	61436	55406	52603	51463	51337	51514	0.149
30.743	49140	49636	50540	52785	65379	57116	51947	51470	50480	50925	50626	51395	52840	55260	60902	53344	53403	50420	49821	50402	50598	50611	52079	61942	56551	52867	51671	51349	51250	0.148
30.758	49704	50214	50702	54354	64554	55975	51426	50700	50790	50335	50779	51705	53227	56647	65516	54556	54749	50573	50100	50134	50175	50518	51859	62777	57194	52627	51690	51487	50630	0.152
30.774	49342	49522	50543	55694	64284	55268	51742	51093	50452	50495	50496	51805	53881	58911	70690	56498	55878	51105	50048	49899	50379	50280	51088	63242	58539	53253	51653	51045	50866	0.149
30.79	50138	49652	50805	57766	63813	54670	51630	51132	50722	50772	51169	51718	55008	62013	78025	59717	58481	51137	49784	49992	50167	50489	51232	63425	59855	53327	51438	51769	51291	0.155
30.806	49655	50160	51592	60958	62659	54253	51513	50862	50733	50534	51141	52043	56446	66250	85598	64322	62906	51577	49970	50104	50405	50736	50481	62412	61898	54423	52177	51778	51284	0.151
30.821	49814	49942	52789	64088	61301	53637	51223	51286	50833	50602	51034	52484	58802	73403	92946	71490	69206	51891	50236	50262	49990	50414	50334	61882	63217	54933	52185	51524	51097	0.152
30.837	49596	50446	54765	67302	60019	53367	51444	50717	50851	50610	51069	53325	61193	80122	96162	80122	77674	52406	50497	50182	50175	50478	50186	60744	65017	55577	52277	51796	51630	0.151
30.853	49409	50554	56414	69043	59450	52683	51648	50741	50333	50482	51082	53873	65526	88494	97217	87578	86283	53213	51092	50483	50193	49957	50577	59933	66032	57421	52848	51950	51193	0.15
30.869	50080	51090	58889	68891	58467	52249	51629	50710	50691	50569	51547	54447	70925	94174	98085	93110	92254	53839	50684	50223	49779	50229	50604	58187	66437	58897	52830	51478	52057	0.154
30.884	50175	51367	62640	67923	57627	52614	51372	50872	51008	50967	51955	55178	78811	97597	98901	96843	95311	55250	51274	50711	49996	50093	51158	57139	65124	61115	53224	51983	51679	0.155
30.9	49795	51645	65923	66509	57033	52311	50848	51139	50331	51102	52513	56727	87557	99062	99057	97619	96637	56793	51725	50459	50336	50364	50453	55502	63853	63623	53355	52081	52199	0.152
30.916	49641	52551	67092	65594	56440	51952	50860	50704	50786	51304	52603	58809	93670	100350	96987	99433	97613	59660	52195	50717	49903	49870	50688	54654	61797	65582	53908	52287	51867	0.151
30.932	50051	53472	66755	63798	55774	52122	51226	50595	50668	51395	52862	61510	97956	100939	90965	100341	99095	63202	52546	50551	49972	50284	51011	53776	60801	65774	54864	52044	52252	0.154
30.948	49826	55677	64729	61788	54960	51500	51157	50554	51014	51420	53418	66036	100156	99665	84614	98498	99309	69428	52864	50571	50315	50262	50302	52457	59512	64786	55888	52157	52018	0.153
30.963	50308	58100	63133	59317	54761	51425	50584	50694	50461	51716	54378	72416	101293	95170	78128	93919	95452	77003	53447	51044	50443	50014	50420	52364	57844	63473	57537	52738	52279	0.156
30.979	50816	60758	62085	57782	54118	51574	50671	50188	50269	51900	54907	80282	101903	88766	73144	86544	89918	86190	53999	50927	50261	50299	50539	51939	56065	62496	59264	52864	52354	0.159
30.995	51106	63959	60782	55373	53688	51529	50687	50818	50705	53107	55972	89808	100273	82309	69025	79538	81862	94270	54254	51421	50450	50232	49706	51181	54807	60720	62415	53059	52565	0.161
31.011	51539	65888	58858	54473	52935	51619	50446	51143	51427	52682	57078	98359	95735	76482	65196	74214	75598	98969	55311	51799	50609	49868	50109	51641	53924	59504	64614	53506	53100	0.163
31.026	52360	65777	56607	53155	53102	51412	50676	50799	50948	53393	59850	102440	89084	71829	61519	69319	70643	101003	56237	52192	50358	50011	50261	50649	53235	57707	65860	54176	53281	0.169
31.042	53857	64121	54619	52676	52652	51147	50893	50669	51898	54154	63843	104014	82417	67132	58494	65221	67134	103172	58049	52331	50521	50537	50025	50926	52833	55951	65419	55251	53811	0.178
31.058	55897	62838	53267	52391	52575	50809	50621	50768	51688	54255	68747	105457	76654	63364	55863	61124	62441	103683	60485	53078	50958	50338	50421	50925	52344	54720	64212	56862	55467	0.191
31.074	58783	62052	52549	52324	51815	50987	50911	51206	52602	54837	77331	104429	71927	59806	54117	57565	59071	100492	65736	53297	50828	50162	50571	50517	52630	53617	61986	58694	56867	0.209
31.089	62205	60923	51736	51808	51575	50678	50875	51034	52352	55991	87387	100462	67061	57255	53491	54844	56341	95402	72667	53658	51128	50426	50215	50909	52674	52774	61249	61314	58925	0.231
31.105	65762	59643	51866	51142	51345	51194	50760	51002	52782	57477	97432	94550	62849	54985	52519	53114	53625	87685	82080	54025	51766	50306	50432	50472	52185	52519	60333	64497	61619	0.253
31.121	68455	57276	50997	50967	51629	50894	50739	51793	53053	59141	104872	87348	59342	53818	52273	52163	52456	81296	93413	54266	51835	49962	50484	50319	52211	52408	59050	67183	64841	0.27
31.137	67779	55178	51164	50904	51414	51082	50803	51482	53485	62868	107658	80421	56413	53286	51858	50961	51930	75278	103579	55190	52197	50370	50341	50730	51923	52045	56801	67652	67756	0.266
31.153	66277	53994	50835	50598	51076	50815	50864	51838	53691	68096	108796	75595	54410	52409	51717	51374	51309	69587	107355	56406	52519	50794	50315	50427	51694	52186	55317	66485	68432	0.256
31.168	64807	52962	50747	50433	50943	50483	51514	51874	54454	75755	108039	69666	53721	51806	51064	50449	50451	64300	107907	59083	52317	50948	50972	50299	52213	51753	54595	63919	67103	0.247
31.184	63696	52032	50358	50298	50821	50952	51544	52611	55154	85481	103795	64520	52986	51582	51026	50633	50633	60296	107188	62074	52810	51058	50938	50515	52292	51477	53338	63176	64984	0.24
31.2	62197	51774	50179	50475	50820	50830	51576	52355	55724	96409	96901	60074	52204	50662	51591	49985	50509	56626	103746	67515	53653	51263	50985	50248	51806	51897	52825	61925	63585	0.231
31.216	60671	51406	50681	50760	50915	51129	51970	52796	57070	104022	90080	57440	52192	51301	51321	49592	50215	54392	97301	75479	53225	52173	50532	50344	51801	51598	52400	60439	62362	0.221
31.231	58100	50931	50428	50678	50635	50598	51587	53066	59183	109110	82670	55521	51857	51361	51422	49844	50138	52942	89734	86527	54073	52210	51210	50428	51543	51811	51865	58643	60939	0.205
31.247	55714	50445	50024	50747	50636	50697	51790	53119	62650	111045	77346	53880	51358	51230	50861	50184	49731	52376	82404	97907	54078	52225	51215	50868	51834	51448	52164	56749	59369	0.19
31.263	54300	50257	50445	50269	50919	51144	52033	53141	67916	108857	70784	53532	50954	50610	51085	50013	49835	51580	76740	107099	55178	52202	51781	50589	51880	51292	51838	54759	57267	0.181
31.279	52940	50418	50422	50587	50970	51320	52209	53499	74746	104042	65166	52722	51334	51157	51001	49589	49226	51172	70931	112725	56072	52743	51671	50965	51550	51293	51911	53801	55402	0.172
31.294	51777	50085	50485	50636	50804	51157	52251	54007	84295	97744	60860	52553	50976	51098	51677	49386	49796	50701	64555	111027	58213	52637	51554	50689	51749	51269	51571	53411	54110	0.165
31.31	51209	50257	50001	50531	51286	51442	52295	54627	94795	91486	57617	52092	51116	50978	51631	49530	49960	50921	60043	108015	60679	53165	51495	50881	51814	51277	51796	52708	53234	0.161
31.326	51197	50430	50425	50852	50922	51914	51890	55527	103538	85181	56108	52025	50767	51259	51834	50315	49661	50063	56094	101338	64103	53193	51995	51361	51864	51481	51856	52296	52484	0.161
31.342	50574	50422	50227	50208	51198	51611	52545	56769	108017	78806	54440	52023	51165	51312	52092	50438	50404	50214	54308	94916	70662	53211	52156	51679	51524	51480	52083	51978	52148	0.157
31.357	50329	50115	50245	50481	51420	51647	52606	59085	110378	72304	53917	51306	51390	52141	52323	50616	50539	50204	52767	88689	79572	53772	51902	51175	52144	51931	51783	52020	52159	0.156
31.373	50212	50114	50192	50754	51234	51377	52756	62470	109245	66583	53294	51324	51801	51979	51932	50881	50598	50355	52180	81821	90416	54194	52065	51883	51804	51394	51552	51743	51915	0.155
31.389	50945	50139	50199	50894	51007	51939	52924	66667	105064	61645	52355	51185	51901	52242	52118	51147	50776	50134	51799	75824	102065	54660	52662	51354	52411	52078	51517	51937	51515	0.16
31.405	50451	50114	50248	50830	51332	51888	53557	73765	99252	58637	52077	51545	51958	52628	51741	50785	51180	50125	51299	68957	109563	54982	52591	51913	52213	51629	51528	51669	51805	0.156
31.421	50736	49816	50173	50734	51214	51816	53822	82701	93084	56456	51989	52259	52164	52398	51824	50887	50885	50652	51062	62273	112377	56208	52360	52079	52114	51590	51555	51603	51956	0.158
31.436	50128	49928	49986	50806	51377	51609	54165	91980	87563	55172	52096	52384	52346	51806	51328	50724	50796	51197	50990	57682	111267	57474	52974	52039	52652	51309	51866	51586	51945	0.154
31.452	50101	49694	49614	50482	50874	52033	55688	99751	81370	53623	51486	52784	52230	51721	51471	50559	50691	51518	50968	55278	106914	59454	52980	51961	52770	51187	51812	51542	51263	0.154
31.468	50023	50115	49797	50912	51059	51848	56724	105581	74373	53270	51741	52799	52020	51926	51051	50074	50277	51528	50701	53762	100822	62852	53455	52433	52469	51790	51540	51519	51660	0.154
31.484	50174	50177	50424	51269	51439	52101	58780	108066	68490	53138	51845	52641	52041	51320	50838	50104	49975	51674	50614	52916	94392	67167	53774	51748	52406	51642	51514	51811	51589	0.155
31.499	49885	50282	50178	51199	51231	52635	61565	108786	63791	52461	52097	52735	51798	51311	50545	49860	50666	51550	50771	52177	87357	73644	53827	52386	52521	51930	51892	51313	52281	0.153
31.515	50232	50438	49552	51035	50925	52472	65524	107012	59970	52532	52573	52631	51348	50858	50837	49692	50075	51369	50978	51872	80026	82325	54182	52000	52583	51604	51263	51844	51692	0.155
31.531	50434	50166	50161	50973	51209	53155	71748	102216	57898	52430	53016	52282	51296	51106	50626	49237	49943	51560	51057	51867	74298	91675	55105	51995	52624	52309	51673	51675	51612	0.156
31.547	50265	49860	50098	51294	51418	53510	79662	96308	55953	52505	53762	52167	51251	50900	50669	49284	49354	51146	51781	51147	67879	101327	55293	52359	53016	51975	51689	51496	51341	0.155
31.562	50159	49595	50256	50927	51838	54123	87452	90814	54569	53010	53948	51916	50745	50540	50554	49330	49560	50591	52251	51099	62384	107429	56270	52296	52478	51928	51573	51556	51592	0.155
31.578	50456	50066	50218	50739	52045	55533	96367	84454	54164	53028	53368	51862	50956	50440	50893	49326	49479	50227	52622	50806	57673	110379	57441	52961	52901	52203	51789	51202	51678	0.157
31.594	50074	49782	50342	51049	52127	56293	101744	78204	53953	52992	53184	51585	50538	50450	50712	49263	49658	50849	52579	51588	55146	109451	59241	53226	52964	51661	52026	51896	51941	0.154
31.61	49945	50040	49732	50556	51956	57818	104500	72612	53344	54186	53214	51266	50822	50122	51034	48900	49610	50369	52338	51127	53933	106951	61196	53412	53472	51895	51899	52020	51421	0.153
31.626	49724	50152	49817	50854	52152	61418	106967	67516	53411	54470	52186	51203	50624	50641	50759	49460	49267	50321	52524	51587	53373	102079	64861	53926	53980	52507	52033	51918	51690	0.152
31.641	50680	50116	50654	51618	53072	65290	107196	63185	53589	55163	52867	51392	50630	50549	50813	48964	49410	49724	51858	52016	52620	95571	69118	54274	53958	52831	52367	51348	51561	0.158
31.657	50227	50160	50183	50890	53229	71652	103673	60089	53933	54599	52254	50775	50592	50234	50355	49244	49023	49693	51710	53284	52152	87832	76152	54193	54556	52986	52363	51754	51744	0.155
31.673	50106	50361	49728	51116	53592	79264	98282	58153	54439	53799	51633	51118	50694	50850	50530	49162	49318	50015	50966	53506	52096	80559	84378	55109	55072	53032	52690	51620	51555	0.154
31.689	49877	50310	50356	51413	54475	87013	93190	56640	54651	53578	51877	50387	50986	50240	50881	49257	49567	49806	50978	53873	51905	75099	93285	55852	55218	53218	52926	51892	52105	0.153
31.704	49943	50416	50228	51129	55465	93914	87502	55619	54805	53154	51397	50574	50174	50485	49830	49282	49738	49551	50774	53377	52346	69163	100818	56724	55644	53645	53062	51889	51780	0.153
31.72	49987	49766	49863	51337	56610	98787	81912	55579	55019	52476	51117	50535	50544	50404	50363	49442	49185	49535	50362	53035	52624	63572	105206	57871	56133	53507	52997	52053	51834	0.154
31.736	49967	50145	50336	51437	59577	101612	76241	54852	55136	52471	51052	50227	50633	50115	50491	49089	49476	49931	50341	52387	52231	59901	108062	58876	56232	53779	53294	52404	51871	0.153
31.752	49756	50156	50557	51482	63038	104524	71216	55001	54947	52277	50977	50652	49855	50825	50345	48897	49293	49560	50507	52395	53482	56248	107462	60363	56906	53918	52857	52026	51614	0.152
31.767	49890	50090	51135	52044	67919	103687	66705	55470	54373	51801	50624	50790	50636	50530	50558	49296	49787	49615	49964	52218	53733	54436	105916	62316	57313	54350	53587	52360	52194	0.153
31.783	49915	50035	50406	52126	74678	99979	63241	56120	54315	51555	50949	50700	50496	50414	50706	48956	49101	49617	49848	51853	54573	54029	101639	65001	58053	54303	53386	52235	51789	0.153
31.799	50566	50160	50567	52010	81208	95521	60504	55461	54036	51413	50668	50682	50547	50416	50977	49175	49469	49530	49878	51528	54760	53799	94418	67678	58808	54557	53887	51917	51656	0.157
31.815	50304	50085	51011	52696	87573	90489	58914	55748	53197	51098	50699	50804	50372	50198	50431	49381	49126	49904	49684	50845	54476	53283	86318	71908	59151	54831	53536	52766	52337	0.156
31.831	49786	50420	50854	53210	91780	86567	58117	55824	52992	50752	50607	50321	50746	50512	50646	49144	49155	49606	49609	50414	53472	53221	79780	76485	60422	55030	53532	52842	51947	0.152
31.846	50216	50060	51342	53237	95011	81767	56992	55733	52559	51166	50678	50767	50961	50755	50602	49284	49293	49540	49902	49945	53152	53154	74424	82057	60636	55242	54243	52705	52242	0.155
31.862	49843	50415	51623	53897	97499	76510	56313	55348	52037	50779	50373	50280	50758	50734	50962	49085	49005	49366	50168	50555	52886	53982	69049	87115	62157	55566	53849	53165	52242	0.153
31.878	50403	50463	52257	55249	97410	71592	56825	54882	51920	50858	50728	50422	49906	50445	50556	49039	48989	49718	49304	50375	52927	54563	64273	92139	62820	55678	53663	52539	52400	0.156
31.894	50031	50517	52149	55966	95847	68011	56228	54573	51542	51022	50321	50620	50402	50415	50724	48769	49062	49928	49423	50100	51851	54778	59712	96196	63768	55901	53480	52523	51985	0.154
31.909	50093	50276	52357	57776	94113	64567	56507	53773	50933	50748	50703	50175	50398	50481	50937	49102	49427	49683	49618	49666	51496	54814	57215	98885	65496	56424	53238	52322	51929	0.154
31.925	50309	50495	52776	61293	90069	61933	56975	53389	51296	50883	50705	50664	50214	50628	50443	49365	49262	49138	49454	49891	51524	55350	55505	99303	66770	56254	53676	52380	52302	0.156
31.941	50480	51022	52759	65814	87220	60593	56607	53181	51176	50921	50833	50719	50694	50231	50723	49417	49461	49252	49605	50000	50612	54242	54307	98352	69281	56547	53925	52695	52037	0.157
31.957	49978	51126	53031	71792	83064	59216	56331	52526	50725	50495	50207	50323	50520	50385	50774	49483	49688	49364	49770	49777	50651	54071	53976	95400	72020	56730	54234	52862	52254	0.153
31.972	49630	51679	53458	79176	79428	58705	55847	52243	50649	51076	50049	50813	50957	50700	50599	49188	49451	50017	49775	50188	50532	53445	54300	91252	75437	56866	54346	52959	52782	0.151
31.988	50447	52045	53402	88029	76185	58424	55399	51913	50914	50605	50332	50458	50400	50439	50920	49486	49425	49507	49426	49600	50387	53149	53990	86963	78779	57502	54532	52785	52518	0.156
32.004	50430	51687	53504	95588	72347	57971	54753	51837	51206	50399	50278	50804	50820	50984	50868	49359	49335	49379	49405	50202	50184	52406	54360	80643	83223	57235	54671	52604	52311	0.156
32.02	50312	52158	54239	99387	70325	57941	54385	51437	50987	50923	50909	50762	50317	50822	50721	49201	49787	49878	49879	49831	50315	52211	54863	75267	88164	57899	54913	52905	52665	0.156
32.035	50598	52419	54683	102823	68422	58324	54018	51812	51149	50819	50895	50521	50255	50421	50682	49534	49894	49611	49634	49861	49901	51668	54766	70320	91926	58608	55094	53260	52626	0.157
32.051	50245	52471	55425	105544	66299	57673	53571	51244	50766	50451	50580	50585	50846	50796	50654	49680	49463	49391	49800	49725	49958	50968	55868	66532	95853	59816	55668	53179	52951	0.155
32.067	50964	52525	57025	105617	64861	57631	52983	51240	50728	50569	50659	50791	50661	50268	51330	49522	49707	49899	49707	50236	49935	50622	54906	62427	97536	60893	55692	52997	52868	0.16
32.083	51076	52704	59593	103221	64375	56769	52679	51088	50315	50527	50812	50839	50664	51041	51044	49491	49948	49941	49930	49688	49955	50783	54851	59741	97233	63343	55955	53494	53025	0.16
32.099	51375	53258	63820	99036	63380	56825	52366	51426	50969	50532	50592	50643	50872	50876	51518	49378	49682	50065	49532	49909	50361	50638	54509	57527	96596	66308	55837	53528	53269	0.162
32.114	51886	53189	69109	95810	63090	56114	52219	51014	50800	50819	50708	50943	50901	50870	51267	49316	49671	49913	49428	49887	50175	50460	53889	56183	93577	70334	56249	54300	53491	0.166
32.13	51892	53469	76972	91453	62854	56036	52406	51205	50637	50780	50625	50813	50599	50952	51325	49821	49125	49349	50084	49524	49785	50636	53236	55018	91259	75883	56319	54745	53570	0.166
32.146	52467	53762	87399	86951	62412	55424	51979	51131	50786	50704	51043	50876	51002	51408	51372	49757	49922	49923	49730	50196	50094	50889	52946	55010	86574	83262	57244	54892	54624	0.169
32.162	52352	54350	97566	82673	61885	55052	51836	51361	51066	50805	50888	50925	50381	51206	50713	49576	50214	50077	49996	49829	50047	50520	52694	54629	81510	90899	57794	55258	54447	0.168
32.177	52694	55196	104952	77812	61538	54476	51636	51270	51162	50679	50514	51024	51336	51382	50834	49555	49932	50060	49560	49875	50041	50547	51987	54792	76741	96844	58278	55093	54779	0.171
32.193	52915	57025	108712	74053	61034	53827	51697	50847	50600	50724	50797	50915	50945	51093	51193	49731	49744	49753	49882	50088	49933	50136	51613	54791	72601	101119	59781	55248	55290	0.172
32.209	53026	58852	110778	70369	60567	53483	51815	50737	50942	51211	50543	50991	50957	51537	51194	49930	50604	50145	49967	49828	50356	50157	51202	55177	68983	103489	61195	56031	55338	0.173
32.225	53285	63197	114677	68076	59817	53324	51529	51177	50785	50603	50760	50830	51367	51349	51499	50224	49991	49793	49878	49955	50760	50114	50951	55132	65785	104449	64085	56011	55997	0.174
32.24	53515	68610	118283	66807	60139	53015	51187	50943	50309	50317	50784	51453	50853	51547	51252	49993	50386	49860	49837	50009	50001	50324	50987	55406	62881	105974	67901	56104	55895	0.176
32.256	53541	76486	116847	65186	58909	53024	51443	51136	50736	51050	50445	50827	51626	51619	51703	49949	50307	50232	50075	50039	49787	50598	50989	55177	61073	106091	72696	56649	56448	0.176
32.272	53406	84945	108886	65267	58577	53118	51475	51168	51137	50582	50952	51616	51285	51461	51396	50142	50462	50300	50291	49810	49863	50275	50933	55401	59476	102040	79587	57459	56872	0.175
32.288	54140	95260	100239	65335	58621	53006	51670	51298	51027	50917	51389	51355	51356	51499	51686	49711	50284	49686	50390	50233	50293	50174	51048	54526	59139	95664	87570	58389	57141	0.18
32.304	55496	102599	92672	65578	58029	52987	51630	50796	50877	50939	51130	51388	51316	51775	52239	50366	50250	50343	49922	50316	50085	50562	50489	53873	58556	88163	95284	58496	57545	0.188
32.319	56939	106812	87098	65422	58135	53977	51559	51372	51167	51271	51199	51619	51619	51792	52519	50429	50675	50402	50650	50094	50316	50560	50206	54139	59071	82357	101238	60132	58910	0.197
32.335	59338	109271	81874	66087	57737	53722	51752	51299	51230	51133	51436	51749	51981	52100	52686	50527	50681	50260	50356	49912	50233	50016	51062	53399	59365	78109	103892	61910	59946	0.213
32.351	63226	112647	76177	67257	57859	53181	51493	51613	51040	50914	51214	51814	51781	52302	53353	50984	50947	50620	50420	50276	50116	50540	50845	53039	59048	74520	104200	64706	61807	0.237
32.367	69269	116761	71726	67530	58455	53375	51820	51177	51185	51529	51838	52032	52119	52950	53509	50997	50968	50777	50448	50358	50269	50216	50460	53060	59300	70139	106972	69356	64822	0.275
32.382	76693	117849	68226	68825	58228	53106	52579	51512	51383	51954	51176	52185	52615	53408	54582	51537	51055	50829	50763	50348	50461	50532	50841	52958	60077	66908	109465	75299	68678	0.322
32.398	87943	112246	66792	69644	58581	53750	52100	51708	51414	51587	51780	52522	52873	53909	56120	52348	52061	50792	50480	50513	50697	50830	51023	52980	60126	64374	109490	83982	75074	0.393
32.414	99010	104314	66662	69349	59416	53783	52021	51783	51434	51537	52071	52323	52964	55024	57645	53286	52339	51056	51234	50477	50525	50597	50797	52771	60727	63240	103896	93403	83047	0.463
32.43	107763	95832	67036	68889	59697	54201	52107	51505	51686	51688	52377	53111	53902	55768	60333	54207	52962	51449	51008	50628	50525	50570	51165	53602	62730	63476	96051	102507	92588	0.518
32.445	111467	89564	68584	67779	60869	54997	52614	51933	52119	51653	52647	52835	54923	57627	63161	55786	54631	51426	51368	50926	50463	50947	50643	53246	63740	63801	87480	107194	102679	0.542
32.461	114668	84426	70240	66520	61494	55121	52722	51823	51709	51920	52242	53568	56147	60351	66711	58102	56740	52019	51265	50710	51034	50847	50696	55115	65222	65011	82991	107865	107830	0.562
32.477	118429	79600	72248	64525	62568	55271	52505	52143	52299	52067	53061	53975	57690	63411	69318	61537	59653	52300	51456	50840	50866	51027	51058	55473	66392	66296	79435	110194	108853	0.586
32.493	123320	73901	73473	63555	62765	55930	52926	52202	51837	52129	52775	54815	60155	66886	70624	65269	62893	52559	51336	51092	50917	50840	51006	56061	66519	68242	74464	114701	111519	0.616
32.509	122148	69140	74408	61400	62572	56526	52969	52359	52633	52516	53348	55398	63105	69529	70759	69099	66385	53725	51422	51564	51266	50949	51014	56988	66471	70405	70555	116731	115168	0.609
32.524	115014	66738	73514	59931	62722	57297	53038	52574	52428	52967	53509	57081	66269	71826	69183	70566	68929	54738	51692	51563	51387	50974	51216	57725	66231	72176	67275	113227	118133	0.564
32.54	104453	64912	70628	58679	61705	57738	53989	52980	52541	53393	54227	59000	69842	71974	68983	70954	70539	56279	51943	51721	51208	51055	51638	58369	64993	72415	64757	103063	114169	0.497
32.556	96023	63806	67834	57059	60580	58846	53907	53179	52786	53445	55131	61729	72622	71590	68307	69439	69081	58787	52458	52111	51421	51064	51491	59284	64258	71261	63264	93719	104905	0.444
32.572	89707	63622	65690	56130	59666	59526	54696	53053	53145	54236	55872	65856	73958	70927	67581	68637	67957	61926	53221	52246	51435	51483	51928	59326	63505	69363	62919	87425	95119	0.404
32.587	83884	63955	64064	55015	58528	61222	55035	53554	53730	54301	57170	69778	74719	71862	68399	69141	66974	65902	53583	52799	51700	51479	52640	59994	62289	67433	62658	83007	88750	0.368
32.603	78260	64614	61887	54758	57299	61795	55838	54039	54563	55198	59640	75418	75063	71863	67991	69623	67461	70527	54388	53147	51916	51825	52641	60204	61148	66435	62717	78352	83984	0.332
32.619	72502	67138	59902	53813	56310	62199	56053	54608	54774	56478	63113	79027	75711	73389	68292	71480	67990	73659	55989	53236	52207	51867	52623	60133	59524	64533	63722	73661	79223	0.296
32.635	68290	68521	57277	53365	55893	62295	56958	54995	55895	58412	67385	81501	76894	73038	68588	71735	68285	75617	57989	53843	53149	52138	54298	60039	58487	63024	65297	68261	74080	0.269
32.65	65804	70424	55565	52654	54821	61599	58344	55852	57313	60348	72939	82529	76029	71556	67528	70939	68585	76398	61764	54541	53292	52642	54791	59327	57734	61143	66909	65514	69377	0.253
32.666	64195	71533	54031	52482	53687	61215	59859	57537	58874	63795	79569	82276	73986	69293	65291	67769	68681	77044	66054	55911	53563	53064	55929	59403	57152	59100	68810	63511	66141	0.243
32.682	63910	70646	53134	52349	53519	60298	60782	58881	61556	68283	85282	80917	70670	66466	63894	64930	68063	78400	72256	58176	55490	53698	57689	58875	56788	57410	70616	62822	63944	0.241
32.698	64505	68844	52628	51964	53114	59046	62200	60356	64530	72634	87951	77904	67085	63601	62336	62675	65880	77901	80278	61320	56640	54553	59363	57942	55840	56710	70581	62315	63352	0.245
32.713	67051	67179	52353	52373	52222	58497	63291	61902	67503	76181	86601	73839	65232	62780	61227	61122	63034	75935	86676	64826	58538	55908	60865	57943	56022	55349	70182	62910	62994	0.261
32.729	69029	65157	52107	51966	52475	57548	63323	64612	69700	79421	82926	71354	63046	60612	60116	60155	61358	71804	88801	69005	61869	57726	61912	56937	54845	55171	67815	64340	63763	0.274
32.745	69946	63137	51882	51877	52509	56483	63414	65517	71432	81850	79628	68005	61128	59481	58511	58325	60048	68380	86290	72470	64992	59933	62805	56659	55164	54336	66334	66365	65721	0.28
32.761	69891	61825	51883	51675	52382	55363	62636	67014	73079	84192	76903	64902	58943	57369	56685	56542	58914	65442	81395	75429	67696	62062	63885	56708	54617	53405	65029	68813	68016	0.279
32.777	68682	59489	51513	51396	52508	54624	62304	67777	74824	84075	74476	61672	57129	55996	55624	54226	58134	63259	77085	77376	68921	64977	63797	56012	54613	53733	63945	70029	70061	0.272
32.792	66796	57178	51614	51168	52082	54483	61607	67899	77181	83346	71065	58679	55739	54880	54168	53078	56028	60911	74813	79639	68796	65891	63172	55788	53926	53868	61985	70074	70579	0.26
32.808	64355	55351	51445	51517	52937	54116	60797	68910	79067	79819	66884	56493	54369	53682	53423	52379	54371	58156	72373	83355	68479	66091	62342	55242	53994	53257	60135	68523	68867	0.244
32.824	63017	54309	51365	51035	52026	53774	60138	69852	80386	75550	62825	55284	53131	53207	52384	51093	52881	55888	69830	84464	69373	66601	62510	54957	53911	53541	57824	66546	66745	0.236
32.84	61187	53504	51230	51835	52376	53510	60112	71700	80600	71904	59051	53873	52978	52612	52275	51062	52202	54243	64999	82187	71534	65172	60909	54737	54064	53033	56987	64850	64966	0.224
32.855	59847	52419	51200	51704	52007	53501	59696	73597	78971	69145	57396	53472	52703	51921	51943	50890	51498	53075	60990	78352	74738	65299	59861	54455	53848	52982	55387	63064	63906	0.216
32.871	57704	52542	51834	51482	51978	53457	59883	75701	77031	66197	55440	52958	52208	52287	51924	50432	51232	52294	57440	73565	77042	65354	59136	53866	54245	52843	55079	62590	62314	0.202
32.887	56179	51850	51043	52240	52128	53569	60060	76314	73239	63001	54283	52357	52045	51977	51556	50589	50977	51783	54866	70119	79504	65626	58358	53808	53765	53357	54280	60653	61239	0.193
32.903	54501	51819	51239	51396	52016	53625	61587	76600	70587	59629	53978	52136	51442	51428	51537	50395	50443	51351	53944	67375	79809	66242	57958	53820	53343	53115	54041	58711	59005	0.182
32.918	53413	51632	51473	51382	51789	54006	63879	76541	68266	57640	53030	51598	51526	51064	51441	50237	50469	50946	52641	64947	78017	68071	56977	53644	54039	52597	53561	56713	57109	0.175
32.934	52563	51604	51216	51451	52295	54462	65638	74999	65421	55494	52473	51495	51165	51159	51650	50262	50032	50903	51578	62276	75218	70380	57404	53686	53693	53444	53377	55570	56112	0.17
32.95	52779	51655	51365	52032	52011	54209	68980	73361	63505	54812	52657	51612	51445	51147	51617	49716	49896	50172	51633	58822	72049	72940	57748	53957	54350	53261	53355	54468	54507	0.171
32.966	51893	51371	51340	51869	51882	55036	70369	71391	60921	53695	52144	51455	51246	50899	50789	49621	49875	50590	51460	56333	69493	76420	57642	53665	54128	53122	53084	53736	54333	0.166
32.982	52009	51231	51976	51865	51988	55655	73140	68538	57715	53080	51586	51323	50964	51014	51314	49928	50250	50761	51397	54266	67634	77526	58762	53888	53520	53195	53079	53479	53754	0.166
32.997	51395	51004	50993	51665	52765	57010	74330	66588	56659	52595	51450	51009	51129	51245	51273	49530	50092	50315	51040	53552	65015	77715	59647	54171	54055	53989	53226	53798	53441	0.162
33.013	51805	51357	51707	51932	53098	58321	74557	64132	55482	52689	51433	51117	50888	51447	51066	50382	49654	50599	50721	52472	61975	76462	61345	54541	54699	53736	53473	53111	52814	0.165
33.029	51545	51218	52125	51879	53207	60485	74096	61773	54256	51844	51297	50956	50848	50955	51009	50228	50113	50526	50664	52393	59143	73676	64387	54043	54630	53755	53507	53221	53072	0.163
33.045	51683	51337	52154	51866	53526	63875	72622	59881	53800	51760	51095	51510	50968	51057	51216	49970	50379	50483	50326	51524	56607	70615	67526	54650	54793	53520	53196	53168	52959	0.164
33.06	51362	51107	52159	52710	54360	66332	70481	57846	52828	51865	51248	50942	51045	51069	51641	49819	50080	50156	50488	51886	54598	68747	70461	55053	55854	54449	53345	53806	52802	0.162
33.076	51360	51481	52130	52443	55446	69237	68788	57093	52710	51645	50844	51567	51147	51178	51672	49815	49823	50495	50794	51286	54049	66116	73545	55533	55547	54885	54186	53055	52841	0.162
33.092	51478	51363	52388	52814	56115	71907	66423	55424	52474	51573	51212	51197	51164	51249	51214	50003	49834	50385	50292	51308	52363	63834	75264	56370	56957	54861	53640	53235	52733	0.163
33.108	50989	51637	52873	53085	56859	73543	64814	54684	51992	51344	51112	50989	51110	51222	51431	49549	50020	50697	50377	50855	52293	61131	76380	57048	56470	55004	53699	53161	53207	0.16
33.123	51381	51603	53125	53002	58988	73589	62355	53860	51761	51386	50683	51203	51107	51921	51562	49599	50298	50332	50296	50726	51461	58035	75768	58748	57102	55564	53857	53056	52775	0.162
33.139	51351	51588	52913	53979	61313	73319	60734	53159	51802	51278	50661	51030	51456	51133	51824	49915	50411	50301	50370	51178	51686	57065	73902	59879	58140	55570	53666	52872	53087	0.162
33.155	51231	51823	53320	54248	64370	72548	58737	53057	51392	50977	51362	51346	50729	51659	51979	49790	50144	50161	50882	50629	51266	54663	72148	61014	58475	55782	54467	53092	52688	0.161
33.171	51309	51527	53297	55392	67174	70776	56974	52556	51733	50815	51121	51328	51407	51342	51964	49628	50417	50139	50612	50985	51212	53899	69968	63034	59170	56129	54421	52956	52913	0.162
33.187	50994	52370	53776	56111	70970	69773	56000	52306	51527	50984	50839	50949	51258	51306	52483	50654	50522	50144	50675	50602	51099	52747	67807	64881	60199	56297	54205	53386	52874	0.16
33.202	51248	52011	54029	57274	72966	68190	55123	52057	51536	51310	51460	51021	51601	52140	52783	50547	50864	50414	50421	50475	50896	52793	64982	67196	61686	56770	54550	53435	53132	0.162
33.218	51275	52457	54512	59865	73790	66180	54662	52379	51902	51263	51049	51042	51293	52140	53607	50648	50539	49965	50400	50891	51177	51929	61839	68890	63815	57499	54728	53511	53169	0.162
33.234	51493	52993	55590	62358	74196	63913	53867	52076	51201	51089	51135	50936	51225	52453	53424	51551	51192	50141	50022	50767	50768	51830	59502	70664	65427	58032	55359	53748	53129	0.163
33.25	51460	53023	56466	65780	72944	62304	52694	51491	51424	51171	51156	51089	51215	53101	54099	51375	51995	50257	50516	50237	50874	51635	57266	72404	67720	58985	55078	53304	53206	0.163
33.265	51641	53084	58781	70744	72162	59920	53144	51534	51546	51295	51021	50961	51824	53426	53797	52042	52355	50403	50326	50339	50825	51364	55760	72973	71334	60901	55883	54015	53540	0.164
33.281	51583	53350	61801	76204	71330	58292	52804	51533	51204	50977	51154	50968	52197	54086	53753	52333	52551	50166	50784	50664	50877	51376	54327	73144	74845	62269	55915	54400	53891	0.164
33.297	52282	53236	65389	82930	70539	57038	52919	51694	51457	51429	51373	51402	52898	54314	53379	52497	53178	50352	50168	50279	50798	51270	53673	72724	79367	65261	56617	54768	54032	0.168
33.313	52102	53768	72199	86979	68871	56338	52395	51381	51268	51300	50707	51046	53091	53935	53129	52689	52919	50495	50540	50509	50765	51201	52722	71059	82468	69362	56962	54466	53994	0.167
33.328	52351	54651	78648	88174	67080	55130	51991	51237	51131	51182	50797	51310	53794	53496	53092	52197	52386	50168	50223	50716	50787	50855	52495	69069	84602	74446	57841	54238	54547	0.168
33.344	52396	55068	87460	85889	64769	54883	51756	51285	51563	51224	50605	51035	53478	53173	52874	51893	51627	50645	50733	50200	50482	51027	52088	67093	83302	80508	58458	55663	54683	0.169
33.36	52755	56418	95609	82617	62851	54054	52309	51388	50984	50904	51269	51593	53735	53299	51753	51649	51862	51196	50805	50507	50846	50393	51936	64546	80654	86430	59223	55115	54763	0.171
33.376	52969	58396	99543	79130	61748	53498	51763	51531	51293	51197	51140	52201	53327	53053	52161	51812	51637	51708	50242	50214	51108	50567	51500	61973	77077	90902	60013	55669	55003	0.172
33.391	53121	60528	97640	77542	60138	53681	51658	51156	51018	50849	51340	52948	53674	52890	52219	51096	51275	51805	50627	50744	50433	50716	51273	60177	74209	92971	61684	55751	55164	0.173
33.407	53121	64769	92345	74523	58823	53515	51550	51375	51206	51319	51838	53595	53113	52519	52062	51320	51091	52380	51018	50225	50782	50610	51337	57925	71770	90697	63952	56321	55560	0.173
33.423	53486	69999	87384	71191	57792	52479	51320	50753	50764	51417	51499	53607	53211	52239	52131	50630	50942	53136	50411	50469	50478	51073	50474	56157	69453	87455	67573	56794	55892	0.176
33.439	53974	76690	84302	66950	56328	52290	51532	51494	51129	50899	51465	54730	52580	52019	52374	51199	50990	52963	50695	50696	50420	50865	51145	55379	66420	82839	72217	56981	55342	0.179
33.455	54422	84586	82068	62988	55321	52408	51519	51021	50973	51051	51625	54208	52768	51981	51934	50623	50922	53181	50465	50386	50566	50765	50942	54263	62882	79915	77428	57733	56321	0.182
33.47	55350	92366	78208	60466	54814	52082	51477	50984	50964	50823	51576	54172	52658	52926	52458	50936	50895	52347	50669	50624	50501	51027	51692	52851	60344	77172	84019	58315	56968	0.187
33.486	56951	97870	72773	57749	54366	51774	51366	51400	50899	51652	52442	53280	52484	52250	52051	50688	50823	52653	50795	50417	50687	51359	50822	52391	57526	73990	89981	59478	58276	0.198
33.502	59354	96705	66812	55900	54157	51704	51192	51163	51143	51126	52422	53479	52989	52701	52375	51038	51392	52153	51029	50577	50256	50677	50908	52086	56193	69497	94722	61108	59357	0.213
33.518	62589	93697	62320	54349	53371	51209	51488	51058	50763	51029	53249	53449	52787	52306	51805	50943	51213	51957	51470	50603	50414	50396	50718	51509	55735	64561	93759	63661	60332	0.233
33.533	68153	89324	59624	53660	53192	51855	51074	51214	51488	51145	53797	53926	52598	51845	52097	50537	50848	51989	52713	50543	50564	50674	50784	51370	54445	61085	89301	66695	62543	0.268
33.549	74542	85637	56362	53491	52201	51581	51561	51193	51320	51371	54856	53422	52851	52066	51578	50564	50914	52062	53338	50462	50472	50750	50962	51268	54060	58694	85201	72032	66382	0.309
33.565	81891	83361	55446	52914	52112	51447	50885	51517	51290	51735	54293	53921	52689	51986	52094	50514	50445	51789	53346	50411	50563	50614	51053	51688	53546	57270	82353	78773	71173	0.355
33.581	90158	79740	54535	52652	52130	52122	51405	51696	51548	52443	54147	53555	52158	51932	51553	50521	50979	51959	53598	50942	50607	50551	51082	51750	53001	55201	79345	85348	77817	0.407
33.596	95599	74703	53460	52376	52113	51677	51283	51151	51721	52903	54211	53256	52087	51516	51494	50288	50618	51931	52878	51141	50483	50305	50648	51070	53054	54805	76684	91747	84573	0.441
33.612	95083	69575	52997	52028	51382	51974	51516	51453	52067	53696	54191	53267	52079	51355	51355	50011	50831	52355	52953	51530	50446	50340	50771	50893	53331	54663	72051	94456	91284	0.438
33.628	92054	64682	52694	52075	51837	51049	51454	51398	51510	53784	54043	53194	51801	51538	51522	50236	50091	51615	52664	51681	50439	50609	50448	51030	52763	53921	67201	91472	93929	0.419
33.644	86518	60776	52374	51962	51766	51107	51649	51585	51638	54521	54429	52999	51827	51228	51379	49871	50116	51727	53278	51999	50306	51092	50553	50661	52861	53549	63395	86793	91565	0.384
33.66	83379	58360	52221	51805	51696	51226	51654	51219	52398	54485	54820	52702	51146	51281	50922	50138	49824	51381	53331	52539	50825	50505	50301	50502	52945	53506	59751	82161	86728	0.364
33.675	81356	56156	51925	51311	51437	51135	51397	51302	52330	54552	54180	52165	51231	50637	51048	49534	50228	51502	53234	53299	50976	50783	50945	50793	52874	52616	57931	80226	82809	0.352
33.691	77805	54745	51553	51354	51343	51085	51700	51185	52966	53892	54108	52454	51003	51079	51279	49944	49901	51450	53184	53811	51051	50598	50728	50974	52719	53042	56375	77392	79769	0.329
33.707	73137	53577	52068	51351	51501	50793	51316	51826	53278	54480	53799	51840	51258	50792	51473	49644	50076	50691	53255	53860	50933	50802	50800	50571	52607	52833	55621	74262	78104	0.3
33.723	68470	53377	51433	51603	51259	51516	51178	51601	54400	54569	53280	52043	50917	50914	50901	49577	49919	50762	53017	53544	51144	50293	50783	50157	52970	52526	54738	69538	74595	0.27
33.738	63543	52889	51631	51399	51241	51057	51079	51573	54639	54782	52428	51952	51154	50977	51214	49462	50011	50094	52642	53578	51618	50754	51039	50226	52532	52692	54003	65535	70327	0.239
33.754	60218	52370	51387	51063	51335	51632	51482	51594	54566	55135	52613	51390	50738	51085	51033	49500	49623	50646	51974	53251	52189	50496	50963	50774	52497	52493	53935	61145	65390	0.218
33.77	57274	51862	51267	51277	50611	51168	51275	52156	54763	54980	52528	51750	51202	51400	51493	49998	49850	50121	52038	53920	52948	50938	50869	50687	52194	52809	53699	58657	61575	0.2
33.786	55094	51697	51135	51318	51419	51033	51842	52854	54771	54337	52321	51131	51073	51207	50968	49629	49787	50261	51816	54444	53242	51171	50485	50590	52419	52470	53241	56946	58532	0.186
33.801	54243	51835	50970	51368	51071	50961	51504	53414	54400	54045	51848	50954	50662	51086	50939	49168	49284	49583	51294	54273	53561	50765	51111	50755	52152	52545	53108	55572	57038	0.18
33.817	53678	51702	50878	51102	51172	51572	51714	54148	55007	53343	52246	51292	50520	51228	51251	49686	49886	49730	50944	54452	54325	50612	51059	50566	52475	52319	53201	54920	55650	0.177
33.833	53035	51520	51483	51036	50969	51204	51719	54239	55480	53096	51278	51292	50965	51507	51188	49637	49930	50198	50628	53325	54246	50919	50856	50770	52540	52424	52971	54071	54584	0.173
33.849	52230	51257	50949	50982	51566	51463	52095	54819	55252	52959	51701	51510	51107	51248	51088	49376	49534	49529	50725	53115	54352	51231	50786	50860	52030	52359	53289	53923	54538	0.168
33.865	52026	50909	50801	51265	50951	51419	51914	54713	55379	53002	51443	51661	51011	51165	50896	49657	49512	49854	50498	52539	53557	52014	50817	50733	52388	52225	52876	53773	53872	0.166
33.88	52020	51300	51313	51225	51554	51436	52915	54957	55087	52680	51146	50979	51058	51532	51052	49624	49888	50243	50393	52072	54131	52514	51149	50809	52439	52413	53201	53121	53785	0.166
33.896	51377	51077	50919	51002	51259	51250	52780	55117	54928	52303	51443	50951	51268	51157	51277	49535	49744	50586	50465	52100	54444	53014	51309	50828	52213	52591	52845	53020	52953	0.162
33.912	51517	50819	50991	51395	51224	51539	53438	54680	53858	51711	51637	50833	51172	51520	51444	49336	50122	50107	50296	51786	54990	54203	51267	50900	52370	52489	52583	53027	52704	0.163
33.928	51368	51734	50720	51380	51216	51571	54032	54930	53785	51802	51295	50663	51209	51164	51083	49917	49646	50222	50426	51401	54939	54885	51383	50667	52555	52618	53100	52579	52888	0.162
33.943	51640	51151	51019	51151	51354	51817	54724	55569	53293	51445	50874	51411	51102	51014	51006	49403	49471	50223	50541	51107	54381	54809	51455	51064	52919	52381	52729	52743	52857	0.164
33.959	51062	50631	50743	51182	51586	52168	55294	55732	53681	51159	51582	51173	50288	50972	50929	50353	49445	50447	50229	50972	53533	54891	52224	50558	52245	51989	53004	52452	52508	0.16
33.975	51254	51116	50806	51113	51686	51988	54918	55195	52662	51334	51111	50974	51141	50616	51142	49919	50017	50171	50157	50434	53294	54327	51959	51391	53171	52303	52082	52651	52554	0.162
33.991	51635	50790	50861	51516	51537	52709	55050	55156	52225	51408	50966	50994	50782	51208	50767	49662	49824	50225	50067	50754	52549	53817	52373	50808	52661	52260	52642	52450	52034	0.164
34.006	50835	50928	50706	50720	51436	52754	54445	54783	52303	51066	51436	51204	51042	50683	51510	49856	49760	50215	50146	50637	52990	53887	52609	51061	52629	52260	52212	52809	52722	0.159
34.022	51232	51145	50793	51249	51685	53960	54942	54484	51779	51224	50958	51049	51197	51418	51022	49814	49821	49933	49844	50199	52336	54321	53316	51236	52490	52556	52901	52459	52784	0.161
34.038	50649	51145	50800	51497	51681	54205	54856	54494	51638	51242	50933	50655	50959	51013	51244	49847	49526	49985	50145	50346	52186	54327	54197	51186	51986	52314	52395	52565	52134	0.158
34.054	50716	50942	50873	51173	52250	54638	55247	53449	51634	51007	51036	50782	51113	51210	51459	50152	49900	49801	50533	50127	51524	54824	54371	51542	52699	52274	52476	52362	52203	0.158
34.069	50713	50807	51003	51409	52140	55099	55535	53662	51106	51317	51132	51262	51275	51527	51216	49737	49556	49982	50224	50387	51528	55152	54473	51548	52473	52319	52534	52419	52383	0.158
34.085	50909	50943	50777	51584	52330	54570	55496	53202	51398	50984	51234	51225	51037	51324	51331	50168	49840	50292	50323	50341	50967	54510	54559	52106	52820	52363	52345	52564	52379	0.159
34.101	50274	50688	50559	51232	52376	54648	55343	53032	51292	51257	50913	51446	51100	51474	51319	49398	49710	50339	50258	50651	50472	54286	54185	51956	52849	52358	52390	52212	52069	0.155
34.117	50855	50404	50970	50723	53573	54749	54960	52369	51266	51116	51175	50796	51332	51052	51311	49725	49877	49732	50424	50651	50323	54060	54522	52456	53049	52067	52201	52522	52417	0.159
34.133	50784	50919	50790	51350	54042	54891	54890	52390	51384	51133	50498	51208	51144	51001	51393	49616	49801	49877	50569	50358	50614	53606	54304	52614	53208	52900	52382	52433	52259	0.159
34.148	50500	51004	51233	51973	54392	55069	54445	51804	51167	51000	51138	51366	51105	51271	50832	50040	50073	50007	49915	50353	50886	52721	54034	53042	52886	52290	52298	52244	52400	0.157
34.164	51073	51227	50975	51650	54558	55363	54036	51989	51256	51387	51349	51372	50878	51391	51119	49940	49917	50308	50301	50323	50495	52795	54354	53409	53453	52825	52587	52155	52233	0.16
34.18	50538	50241	50949	51586	54400	55514	53928	51489	51114	50995	51230	51131	51499	51416	51081	49931	49867	50033	50518	50391	50203	52701	54324	53596	52973	52894	52501	52154	52289	0.157
34.196	50600	50690	51519	51699	54496	55614	53628	51617	51139	51236	51156	50975	51135	51472	51508	50213	50259	50864	50259	50467	50309	52182	54819	54007	53754	52883	52367	52059	52268	0.157
34.211	50833	51278	51237	52590	55195	55277	53525	51524	51008	50947	51099	51546	50654	51209	51297	49772	49978	50216	50264	50442	50781	51537	55075	54348	53655	52883	52882	52477	52162	0.159
34.227	50696	50912	51145	52467	55309	55484	52801	51739	51041	51081	51182	51205	51124	51211	51688	49557	49873	49986	50470	50261	50529	51102	54741	54349	53977	52608	52343	52549	52337	0.158
34.243	50854	51020	51321	53312	55110	54790	52639	51102	50924	51070	51177	51687	51385	51431	50982	50044	50010	50227	49853	50883	50420	51388	54426	54727	54515	52811	52689	52487	52470	0.159
34.259	51050	51139	51552	54668	55968	54233	52335	51434	51718	50808	51376	50946	51312	51458	51695	50452	49807	50075	50543	50424	50533	50783	54449	54062	55239	52901	52895	52675	52331	0.16
34.274	51108	50940	51464	55012	56452	54339	51797	51009	51225	51279	51455	51299	51438	51200	51430	50271	50133	50459	49745	50624	50162	50581	53141	54224	55330	53060	52247	52594	52047	0.161
34.29	50897	50960	51396	55391	55766	53788	51630	51310	50999	51007	50967	51170	51444	51466	51282	50013	50402	49929	50505	50412	51005	50882	52804	54774	56058	53137	52959	52367	52356	0.159
34.306	50869	51140	51527	55755	55615	53483	51945	50804	51252	51092	51327	51204	50859	51203	51558	50346	49960	50023	50204	50171	50492	50773	52956	54928	56182	53520	52736	52549	52243	0.159
34.322	50450	51524	51848	55760	55339	52935	52060	51515	51264	51301	51416	50960	51119	51197	51196	49842	49958	50266	50648	50158	50494	50892	52476	54772	56537	53348	52456	52802	52510	0.156
34.338	50852	51092	52358	55481	54609	52735	51842	51054	51359	51124	51325	51508	50979	51093	51162	49876	49905	49734	50439	50213	50551	50615	52016	54950	56851	54125	53042	52435	52113	0.159
34.353	50667	50665	53083	55748	54816	52111	51698	50972	51558	51506	51231	51187	50901	51378	51498	50071	49995	50406	50420	50318	50428	50828	52062	54378	56674	54082	52735	53005	52065	0.158
34.369	50689	51138	53783	55818	54463	51695	51515	51429	51135	51324	50989	51568	51053	51281	51087	50172	49969	49921	50202	50370	50128	50967	51808	54435	56425	54485	52938	52381	52318	0.158
34.385	50825	51571	55095	56066	54209	52132	51771	51049	51706	51151	51030	50900	50948	51371	51024	49968	49759	49996	50275	50474	50813	50666	51508	54559	55860	55774	52995	52563	52347	0.159
34.401	51038	51277	56014	55732	54204	52060	51748	51218	51295	51156	51026	51292	50927	51457	51553	49717	50114	50421	50417	50337	50350	50566	50487	54018	56214	56130	53338	53014	52716	0.16
34.416	50835	51498	56883	55919	53628	51652	51704	51749	51822	51370	51558	51568	51602	51320	51410	49633	50420	50712	50841	50881	50512	50796	51146	53431	56428	56643	53034	52772	52402	0.159
34.432	50962	51560	56415	55947	53423	52065	51662	51251	51373	51167	51180	51396	51484	51461	51357	50259	50442	50684	50317	50577	50750	50448	50942	52961	56131	56792	53354	52777	52428	0.16
34.448	51105	52121	56184	55748	52921	51688	52177	51524	51224	51413	51651	51581	51019	51682	51633	49999	50569	50245	50354	50598	50414	50931	51328	53084	56159	56676	53117	52615	52704	0.161
34.464	51126	52410	55933	56305	53228	51915	51456	51548	51235	51306	51265	51322	51339	51297	51792	50190	50181	50477	50896	50561	50271	50713	51144	52478	56038	56890	53627	52864	52984	0.161
34.479	50948	53110	55648	56132	52767	51973	51912	51753	51553	51592	51466	51294	51685	51460	51824	50427	50387	50425	50762	50717	50509	50215	51111	52775	56050	56371	54348	52980	52552	0.16
34.495	51263	53667	56130	56145	52587	51687	51760	51216	51906	51601	51467	51584	51352	51708	51666	49727	50561	50556	50730	50729	50791	50893	50840	52163	56045	56694	54753	52828	53246	0.162
34.511	51436	55132	55786	55709	52746	51734	51523	51811	51663	51582	51714	51290	51655	51699	51909	50436	50562	50650	50635	50752	50552	51014	50893	51988	56166	56009	55534	53272	53147	0.163
34.527	51504	56083	56520	55403	52636	51895	51486	51342	52136	51294	51637	51887	51722	51678	51605	50213	50178	50452	50524	50462	50594	50732	51032	51209	56214	56666	56162	53661	53103	0.163
34.543	52394	56867	56071	55491	52630	51828	51657	51882	51914	51805	51703	51883	51593	51742	51884	50377	50541	50590	50303	50853	51015	51283	51449	51535	55982	56554	57523	53520	53192	0.169
34.558	52610	57565	56576	55481	52684	52481	51520	51959	51881	51743	51865	51838	51551	51625	52261	50511	50413	50734	50766	51202	50944	51172	51148	51021	55678	56315	57916	53366	53563	0.17
34.574	51969	57170	58061	55195	53100	52145	51891	52230	51764	52100	51970	51461	51895	52294	51928	50561	50656	50981	50993	50550	50905	50968	51396	51634	55600	56835	58158	53682	53478	0.166
34.59	52829	56089	59646	54834	52869	52230	52382	52038	52037	51477	51934	51742	52166	52098	51787	50190	50673	50830	50945	50894	51003	51161	51338	51152	54804	57568	57709	54252	53442	0.171
34.606	53353	56117	61098	54788	52879	51957	52538	52145	52004	52054	51434	52344	51888	52241	52096	50806	50770	50929	51333	50928	51306	50924	51937	51191	55242	58633	57286	54483	54655	0.175
34.621	53693	56329	62903	55102	52878	52425	52113	52138	51864	51983	52096	52156	51622	52125	52273	50681	50840	51103	50964	50947	51282	51519	51513	51332	54510	59605	57339	54908	54024	0.177
34.637	54732	56126	64419	54819	53337	52595	52198	51867	52380	52036	52259	52036	51835	51922	51873	50363	51121	51220	51100	50851	51077	51007	51482	51549	54485	60921	57144	55868	55230	0.183
34.653	55727	55972	65076	54824	52824	52700	51452	51810	52034	52192	51701	51975	52244	51562	51963	50492	51074	50790	51389	51408	51238	51011	51576	51463	54487	61826	57059	56852	56008	0.19
34.669	56923	56319	64691	54873	52884	51995	51915	52086	51781	51900	51457	51789	51839	52059	51625	50791	50649	51119	51322	51246	51176	51030	51586	51580	54276	62443	57007	58067	56578	0.197
34.684	57424	56882	63065	55256	53573	52207	51796	52615	51795	52112	51879	51865	51816	52050	52148	50791	50778	50892	50796	51024	51212	50993	51621	51489	54237	63515	56719	58846	57440	0.2
34.7	56913	57308	61890	55320	52916	52232	51946	51902	51205	51801	52042	52074	52049	52013	52191	50560	50975	50892	50871	51074	50991	51015	50966	51409	54185	63890	56614	58873	58257	0.197
34.716	56593	58569	60541	55903	53299	52273	52303	51504	51798	51793	52126	52100	51482	52106	52169	50131	50819	50831	50876	51225	51418	51394	51579	51477	54698	62112	57366	58225	58599	0.195
34.732	56417	60200	59605	56249	53652	52393	52158	52196	51442	51704	51906	51798	51894	52621	51771	50532	50944	51141	51248	50933	51128	51141	51037	51209	55616	61111	58308	57496	58354	0.194
34.747	56458	62676	58277	56448	53437	52607	52139	51844	51746	51676	51907	51626	51958	52404	52411	50517	50411	51054	51026	50954	51043	51085	51293	51370	56365	60619	59749	57189	57773	0.194
34.763	56451	64654	57438	57463	54155	52173	52070	51855	51604	51689	52145	51707	52141	52163	52534	50716	50780	50647	50862	50648	51291	50926	51226	51500	57187	59457	60969	57656	57306	0.194
34.779	56417	65112	56092	58773	54169	52503	51925	51963	51534	51772	51753	51632	52477	52477	52695	50712	50760	50988	51072	51099	50808	50946	51225	51180	57795	58955	63443	57685	57778	0.194
34.795	57645	65612	54064	58994	54830	52744	52041	51879	51546	51694	51726	51759	52131	52698	52935	51234	51514	50850	51167	51022	51162	51495	51135	51428	58357	58017	64984	57671	57465	0.202
34.811	58785	63776	53593	59889	54084	52681	51678	51760	51450	51738	51862	52000	52765	53943	53991	51622	51071	51031	51218	50970	50574	51041	51059	51568	58585	57194	65658	57719	58088	0.209
34.826	60517	62178	52871	59733	55018	53335	52340	51845	51229	51772	52282	51683	52579	53418	54676	51631	51783	50589	51006	51087	50993	50941	51122	51822	58519	55817	65406	58889	58093	0.22
34.842	62281	60880	52299	59537	55009	53146	51636	51986	51634	51910	51533	51996	52946	54293	55300	52394	52401	51192	50780	50858	50995	51197	51518	52011	57881	55249	63295	59558	59173	0.231
34.858	65005	59729	52517	59351	55892	53095	51802	51825	51601	52016	51919	52308	53610	54908	55875	53686	52817	51255	50516	51137	50777	50826	51189	52213	58383	54397	61478	62179	60598	0.248
34.874	66691	59047	52339	59207	56039	52991	52458	51931	51767	51744	51899	53001	54198	55951	55789	54435	54065	51232	51159	51013	50464	50912	50996	52277	58372	54127	60771	64382	62875	0.259
34.889	66347	57808	52705	59630	57195	53204	52310	52284	51947	51754	52054	52367	54830	55758	55249	54456	54436	51562	50803	51057	51004	50963	51045	52623	58819	54146	60474	66240	65151	0.257
34.905	63922	55870	53012	59037	57172	53079	51956	52256	51897	52060	52009	52879	55513	55756	54685	54301	55445	51924	50972	50576	51258	50997	51370	52568	58897	53822	58923	66977	66730	0.242
34.921	63211	55161	52366	58395	57502	53619	52281	52480	51943	51585	52424	53084	55940	55052	54686	54101	54152	52302	51401	50992	50726	51036	51144	53029	58442	53898	58402	65237	66552	0.237
34.937	61502	53662	52479	57914	58388	53615	52686	52170	51877	52004	52000	53990	55537	54937	54411	53768	53493	52442	50779	50950	50449	51537	51275	53564	58730	53972	56898	62872	65015	0.226
34.952	61035	53038	52977	56549	58967	54254	52744	51488	52083	51957	52451	54840	55217	54571	53726	52973	53021	53790	51087	50954	51054	51335	51358	54293	58877	54269	55815	61984	62697	0.223
34.968	60048	52896	54227	56215	58339	54594	52635	52051	51966	52261	53271	55526	54735	53991	53990	53119	53365	54287	51523	51087	51032	51187	51354	54846	59175	54628	54576	61316	61284	0.217
34.984	58452	52558	54951	55861	59173	55589	52674	52464	52344	52376	53729	55998	54937	54439	53344	52414	52853	55241	52053	51590	50926	51019	51512	55797	59068	55040	54310	61262	61196	0.207
35	57016	52015	55627	54909	59286	55900	53163	52291	52127	52757	54269	56199	54014	53761	52981	52060	52681	55143	52183	51085	51040	51263	51564	56446	58628	55855	53941	59559	60762	0.198
35.016	55906	52216	56969	54592	59420	55965	53060	52767	52171	53238	54939	56122	53872	52848	52382	52063	52516	54863	52802	51440	51038	50910	51715	57722	57990	56826	54005	58036	59480	0.191
35.031	54067	51762	57319	54239	59054	56715	53453	52552	52748	53320	55901	55495	53215	52866	52400	51191	51759	54167	53176	51614	51642	51186	51876	58096	57921	57747	54182	56505	57480	0.179
35.047	53377	51903	57982	54179	58746	57361	53778	52539	53091	53898	56692	54940	53231	52342	52536	51256	51500	53516	54614	52379	51658	51616	51930	58697	57464	58579	53634	55730	56323	0.175
35.063	52515	51904	57788	53535	57870	58361	53781	53299	53337	55075	56134	54837	52573	52531	52172	50838	50962	53524	55398	52735	51716	51388	52149	59024	57000	58200	53455	54623	55086	0.17
35.079	52310	51821	56112	53190	57231	58658	54535	53094	53819	55152	55799	54546	52567	51956	51792	50631	50731	52915	55563	53781	51331	51618	52494	59090	56779	58374	53854	54014	54576	0.168
35.094	52037	52445	55948	52826	56707	58985	54957	53315	53993	56032	55287	54473	52153	51739	52021	50746	51015	53301	55422	54364	52051	51509	52943	59121	55927	57978	53853	54017	54199	0.166
35.11	52004	52809	55385	53104	55678	59473	55238	53853	55039	56334	55203	53799	52033	52140	51932	50609	50447	52963	55032	55504	52226	51540	53423	58827	55667	57255	54106	54157	53838	0.166
35.126	51725	53191	55527	52944	55576	59776	56211	54027	55249	56377	55135	52490	51630	52021	52628	50869	50713	52089	53866	56059	53257	52188	53880	58542	55213	57004	54678	53418	54019	0.165
35.142	51830	53872	55445	52697	54744	60298	56873	54757	55580	56155	54552	53034	52096	52095	52464	50661	50343	51697	53705	56433	54252	52439	54685	57588	55100	56919	54252	53422	53550	0.165
35.157	51679	54245	54641	52899	54122	59735	57149	55290	55716	55553	54453	52348	52195	52221	52272	50595	50981	51200	53351	56010	54649	52927	55810	57770	54983	56268	55230	53308	53657	0.164
35.173	51604	55263	53804	52954	54097	58693	58360	55573	56441	55614	53780	52180	52287	51814	52203	50690	51149	51729	53531	55580	55821	53618	57355	56762	54715	56271	55663	53601	53570	0.164
35.189	52173	56547	53710	52920	53606	58591	59296	56152	56509	54838	53503	52516	52187	52451	52377	51072	51087	50985	52882	54970	55933	54395	58103	56512	54607	55221	56656	53344	53422	0.167
35.205	51675	57113	52513	52938	53433	56951	59569	56495	56232	54144	52670	52362	51924	52566	52532	51210	51408	51298	52514	54452	56351	54738	60004	55436	54618	54833	57035	53461	53591	0.164
35.221	51876	57792	52572	53597	53155	56691	60130	57060	56012	53780	52394	52275	52141	52615	53070	51386	51428	51206	52027	54505	56242	56013	61270	54925	54238	54528	57809	53721	53414	0.165
35.236	52681	57469	53002	52808	53225	56068	60715	57022	55379	53641	52537	52760	52514	52602	52736	51230	51046	51144	51170	54088	55926	56540	61704	54119	54888	54377	58670	53627	53435	0.171
35.252	53551	57114	52686	53847	52979	55155	60385	57810	55111	53354	52512	52906	52655	52747	52814	51144	51346	51212	51597	53496	55064	56886	61606	54462	54522	54271	58523	53968	53337	0.176
35.268	53789	56024	53189	53508	53148	54408	59737	57959	55508	53139	52560	52529	52902	52752	52948	51411	51364	51447	51594	52528	54885	57619	60458	54124	54611	54361	57744	54176	53667	0.178
35.284	54800	55273	53522	53924	53230	54159	59257	58013	54819	52947	52422	52817	52535	52626	52823	51819	51471	51666	51608	52193	54637	58005	59407	53990	54862	54285	57529	54395	54298	0.184
35.299	55682	55307	53779	54398	53147	53433	58149	59039	55062	52769	52335	52398	52486	53305	53535	51488	51209	51625	51252	51786	54275	58606	58557	53618	54678	54736	56482	55607	54740	0.189
35.315	57285	55307	54172	54657	53740	53622	57621	59329	54340	52589	53088	53084	52715	53511	53519	51836	51529	51985	51348	51528	54040	59195	57965	53269	54430	54923	56832	56387	55672	0.2
35.331	57850	54266	54169	54402	53699	53462	56950	59194	54562	52429	52774	53301	53738	53896	54549	52075	52347	51611	51595	52175	53563	60436	57806	53248	55160	54823	56421	57033	56750	0.203
35.347	57843	54163	55386	54797	53842	52366	56486	58976	54622	53499	53092	53338	53653	54723	55250	52981	52032	51709	51468	51860	52618	61056	56319	52880	54707	55503	55965	58189	57457	0.203
35.362	56763	54079	55983	55743	53694	52554	55552	58724	55702	53380	53370	54057	54210	55308	56354	53744	52781	51779	52052	51630	53442	59968	55376	52618	55127	56324	55870	59083	58180	0.196
35.378	56156	53383	57008	56731	54223	52828	54832	57796	55570	53802	53810	54679	54599	56286	56394	54853	53509	51851	52181	51972	53026	58199	53882	52684	55143	56516	55142	58250	58707	0.192
35.394	55614	53324	58257	57782	54409	53014	53887	56528	56057	54063	54156	55282	56126	56385	56439	55049	54572	52646	52114	52030	53835	57253	53952	52859	55521	56996	54605	57924	58353	0.189
35.41	55303	53280	59963	58844	54782	53133	53621	56198	56915	55239	55449	55995	56619	56698	55819	54887	55149	53303	52492	52223	54347	56679	53046	52632	55921	57973	54994	57200	57125	0.187
35.425	55236	53367	62820	60672	55036	53546	53507	55864	57209	55359	55753	57473	56537	55920	55029	54376	55061	53982	53102	52499	55685	56032	53440	52329	56257	59213	54338	57120	56785	0.187
35.441	54650	53370	66110	62555	55657	53260	53175	55347	56910	56449	57165	56980	55813	55419	55273	54010	54751	55239	53735	53254	57247	55644	52734	52580	57148	60926	54836	57320	56848	0.183
35.457	54108	53840	70561	65372	56008	53685	53202	54503	56501	57097	57531	55955	55468	54964	54576	53233	54057	56180	54512	53650	57830	55125	52404	52979	58842	63231	55046	57077	56703	0.18
35.473	53646	54675	74694	68531	56708	53496	53219	54297	56377	57238	56930	55717	55461	54820	54468	53553	53506	55855	55631	54803	57364	54322	52631	52755	60678	66677	55777	56284	56571	0.177
35.489	53549	54968	79054	71665	56898	53503	52975	53872	56014	56424	56051	55347	54562	54811	54135	53309	53865	55124	56372	56011	56288	53406	52502	52436	62914	70855	55968	55609	56008	0.176
35.504	53044	55845	78790	74804	57111	53522	53424	52824	54975	56312	55204	54729	54836	54718	53704	53184	53146	54449	56200	56886	55185	53110	52097	52335	66711	74928	56598	55989	55814	0.173
35.52	53031	57048	76329	76921	58378	53996	53116	52722	55296	55658	55240	54630	54375	54195	53912	52555	53520	53619	55264	56810	55037	52547	52478	52937	69080	76454	57430	55229	55299	0.173
35.536	52904	58335	73253	76725	58902	53819	53299	53181	55115	55461	55072	54481	53660	53737	53506	52074	53146	53941	54622	56245	55261	52655	52305	53018	70797	76124	58595	55308	55069	0.172
35.552	52949	60696	71066	74052	60132	53892	53223	53424	54162	55104	55023	54031	53301	53334	53062	52261	52233	54104	54216	54924	54769	52484	52629	53251	71769	74537	59685	55638	54906	0.172
35.567	53382	63015	69848	71568	60186	54541	53303	53453	53613	54036	54542	53672	53025	52972	52821	51819	52761	53542	53603	54577	54151	52703	52695	53165	71286	71919	61767	55682	55444	0.175
35.583	53796	66989	68298	69073	61645	54413	53197	52715	53278	54293	53855	53341	53127	53233	53684	51599	51792	52787	54024	54535	53419	52145	52459	54086	70324	70097	63042	55861	55519	0.178
35.599	54588	70453	66374	68123	62197	55039	53040	53109	52864	53756	53060	53034	52769	53197	53815	51548	51960	52297	53937	54219	52755	52454	52516	54361	69732	69096	65526	56225	55708	0.183
35.615	55498	74407	63343	66158	63907	55241	53787	52719	52946	53025	52914	52878	53141	53530	54459	51882	51725	51689	53460	54063	51921	52137	52154	55649	69625	68350	68613	56632	55840	0.188
35.63	56735	77838	60463	64207	64837	55834	53621	53025	52841	52649	52815	52985	53401	53461	55118	52327	52069	51354	52169	53151	51744	52356	52659	56680	68251	66001	72729	57088	56468	0.196
35.646	58144	78814	58396	62073	66666	56434	53651	53119	52468	52988	52569	52630	53255	54170	56568	53005	52469	51714	52472	53138	51947	52232	52175	58614	66445	63566	75642	58167	57245	0.205
35.662	60475	77255	56232	59298	68228	57493	54011	52991	52501	52475	52524	53086	53701	54846	58028	53313	53332	51519	51704	52091	51683	52071	52601	60144	64734	60934	77311	59034	58294	0.22
35.678	62427	74927	54982	57516	69785	58020	53815	52843	52898	52773	52535	52725	53822	55659	60001	54216	53904	51744	52003	52077	51558	51886	52143	62110	63489	59325	76967	60200	59259	0.232
35.694	66353	72148	54097	55795	70492	58981	54426	52788	52700	52435	52838	52570	54391	57384	61659	55268	55422	51646	51768	51876	51670	51833	52623	63878	61887	57378	74950	62586	61545	0.257
35.709	69755	69847	53684	54595	69352	60032	54502	52962	52652	52948	52971	52999	54793	59066	63239	56911	57269	52273	51982	51331	52098	51594	52686	64605	60322	57077	72376	64805	63442	0.278
35.725	75109	68863	53232	53852	67536	61096	54519	53045	52381	52712	52858	53241	55558	61135	64180	59886	59225	52727	51993	51920	51959	52259	52592	65257	59236	55822	70718	67713	65881	0.312
35.741	79426	66466	53582	53652	65450	63557	55212	53258	52653	52613	53373	53583	57445	62926	64458	61932	61285	52546	51873	51808	51711	52055	52916	66573	58911	55686	69387	71956	69271	0.339
35.757	81639	64248	52783	53275	63649	65205	55135	53643	53018	52769	53296	54023	59491	64236	63734	63246	62675	52900	52007	51835	52097	52423	53089	67022	57853	55384	67572	76013	74016	0.353
35.772	79500	61604	52983	52877	62695	66640	56125	53365	52479	52500	53567	54505	61938	64674	62262	63497	62694	53041	51518	52042	52347	52057	53608	66534	57064	54804	65307	79642	78018	0.34
35.788	76819	59030	52321	52827	61666	68226	57001	53603	53019	53144	54454	55398	63268	64008	61778	62898	62436	54283	52264	52336	51593	51958	54732	66252	57123	54461	63562	80457	81022	0.323
35.804	73454	56603	52557	53400	60131	68461	57776	54203	53585	53499	53620	56813	64672	63115	60320	61266	60936	55077	52528	52068	52082	52453	55435	65257	56009	54740	60320	77592	80083	0.302
35.82	71558	55432	52366	52680	58367	68451	58822	54227	53093	53377	54431	57855	64553	61589	60484	60572	60225	56212	52600	53082	52261	52704	56696	64090	56155	54825	58895	74415	76943	0.29
35.835	70567	54895	51921	52262	57113	66787	60352	54610	53912	53549	54687	60629	63222	60850	59477	59647	60134	58981	53533	52723	52389	52716	59012	63017	55882	55011	57574	71627	73491	0.283
35.851	68850	53788	52269	52505	55512	65133	61879	55278	53605	53982	55425	62545	62711	60919	58549	59339	59028	61502	53004	52779	52270	53026	61442	62149	55214	54167	56359	71170	71580	0.273
35.867	65886	53624	52318	52533	54694	64183	63602	56118	54365	54446	56599	65030	61491	59914	57624	58508	58771	63844	53579	52234	52744	53941	64204	60649	55172	54348	55628	69395	70666	0.254
35.883	63284	53412	52366	52672	54592	62658	66233	57098	54819	54854	58092	66252	61064	58864	56742	57512	57231	64915	54203	52764	52937	54056	65678	59530	55167	54064	55159	67131	68891	0.237
35.899	60075	52923	52370	52498	53844	61796	67188	58490	55601	55556	60862	65851	60632	58175	56627	56510	56366	64067	55344	53160	53076	54813	66783	58616	54624	53464	55186	64920	66798	0.217
35.914	58325	52665	52270	52718	53775	60379	67947	61150	56191	57393	63138	64567	60132	57144	55991	55861	55877	62644	57251	53594	53928	56001	67396	57441	55172	53856	55148	62120	64428	0.206
35.93	55899	52948	52319	52483	53403	58823	67702	62817	58195	58639	65455	63510	58966	56456	55706	55384	55125	61315	59759	54057	54235	58204	67431	56521	54317	53886	54642	59547	61136	0.191
35.946	55381	52512	52366	52196	53579	57717	66620	65001	60066	61604	67787	62795	58201	56548	55412	55137	55053	60310	62982	54834	55169	60201	66243	55946	54813	53971	54622	57929	59139	0.188
35.962	54502	52615	52299	52906	53222	56194	65255	66701	62809	63881	66932	62048	57108	56290	54929	54881	54586	59836	65562	56709	56504	63879	65311	55263	54733	54121	54253	57061	57474	0.182
35.977	54110	52779	52547	52259	53057	55100	63772	67555	64991	66529	65715	61420	56716	56018	54497	54466	53596	59604	67529	58986	58762	66426	65177	54960	54490	53553	54496	55799	56337	0.18
35.993	53519	52691	52276	52530	53412	54405	63002	68434	67396	67420	64445	60275	56186	55507	54608	54065	53559	58605	66638	61679	61534	68429	63976	54743	54313	53940	54645	55456	55477	0.176
36.009	53437	52480	52793	52581	52364	54405	61628	66748	68307	68035	63760	58566	56218	54977	54374	54170	53711	57354	64563	64254	64650	68452	62667	54562	54393	53638	54136	55418	55404	0.175
36.025	53122	52373	52612	52302	52863	53800	60442	65662	68353	66699	62043	57829	56134	54955	54333	53495	53357	56728	62621	67506	67987	67415	61393	54191	54119	53908	54132	54816	54798	0.173
36.04	53067	52271	52102	52698	52793	53994	58980	64648	67086	64970	62108	57089	55375	54846	53579	52702	53030	55893	61604	68271	69069	66046	59936	54068	53886	53818	54459	54914	54603	0.173
36.056	52426	52214	52058	52466	52903	52980	57437	63363	65187	63927	61051	56608	54882	54396	53481	53297	52821	55515	61412	68167	68408	64968	58358	53875	53784	53808	54059	54940	54249	0.169
36.072	52758	52236	52152	52552	52599	53386	56336	61840	64493	62986	58884	56008	55187	54569	53685	52625	52662	55246	61215	65105	66919	63406	56985	53424	53563	53832	54113	54364	54016	0.171
36.088	52502	51951	52317	52200	52304	52790	55239	60262	63164	61927	57334	56065	54345	53824	53331	52409	52333	55178	59833	63146	64703	62694	55356	53237	53639	53943	53683	54502	53997	0.169
36.103	52555	51867	51758	52126	52620	53107	54264	59180	61744	61026	56531	55621	54295	53484	53297	52230	52334	54758	58015	62287	63495	62136	54756	53147	53641	53386	53616	54047	54052	0.17
36.119	51728	51783	52278	52393	52487	52365	54490	58016	60840	59436	55853	55691	53873	53074	52879	51775	52151	54084	56699	61688	62747	59766	54279	52939	53580	53467	53469	53524	54437	0.165
36.135	52292	51778	51748	52137	52259	52378	53509	56697	59021	57898	55099	54792	53737	53243	53210	51701	52006	53796	55125	61231	62217	57897	53832	53032	53644	53248	53530	54178	53308	0.168
36.151	52125	51440	52175	52153	52118	52136	53096	54999	57291	56378	55171	54325	53066	53136	52490	51464	51756	52954	54234	60394	60258	56822	53621	52102	53200	53524	53484	53592	53596	0.167
36.167	51953	51965	52167	52130	52109	52112	52938	54038	55891	55642	55231	53815	53315	52818	52595	51082	51208	52866	54376	58162	58631	55125	53396	52029	53688	53177	53648	53760	53534	0.166
36.182	51584	51640	51575	52004	52199	52660	52999	53791	55168	54912	55668	53945	52805	52610	52660	51007	51529	53221	54451	56425	56652	53916	53175	52234	53438	53443	52845	53302	53735	0.164
36.198	52103	52143	52060	52195	52288	52082	52834	53509	54473	54749	55054	54143	52682	52978	52538	51180	51624	52451	54678	54755	55139	53236	52804	51763	53020	53386	53568	53518	53433	0.167
36.214	51912	51942	51780	52355	52067	52392	52711	53151	54263	54295	54707	53269	52483	52310	52488	51458	51191	52489	54400	54356	54096	53595	52221	52193	53038	53307	53353	53255	53503	0.166
36.23	51880	51823	51761	51841	52153	52195	52642	52776	54030	54354	54249	53101	52558	52762	52515	51178	50978	51898	54162	53769	53501	52749	52574	51839	53351	53322	53416	52963	52887	0.165
36.245	51501	51844	51951	51952	51904	52225	52698	52964	53804	54642	53919	52795	52201	52131	52866	51112	51134	51961	53339	53427	53031	52722	52344	51340	52977	52965	53681	53718	53464	0.163
36.261	51809	51954	51852	52104	51960	51879	52679	52909	54273	55506	53750	52549	52440	52338	52435	51355	51147	51686	53735	53433	52488	52931	52207	51798	53376	52946	53099	53025	53062	0.165
36.277	51683	52096	51790	51985	52184	52033	52515	53224	54089	55121	53706	52601	52419	52373	52334	50708	51277	51536	53285	53700	52532	52757	52372	51813	53608	52934	52802	53589	53092	0.164
36.293	51324	51759	51257	51547	51913	52171	52721	53231	53931	54616	53644	52233	52186	52590	52538	51031	51505	51859	52795	54085	52995	52528	52085	51565	53396	53243	53227	53283	53603	0.162
36.308	51749	52086	51864	51761	52091	52148	52898	53159	54778	54233	53855	52426	52470	52590	52900	51154	51337	51827	52301	54019	52885	52762	52485	51597	53555	52800	52884	53749	53414	0.165
36.324	51736	51736	51617	51700	51630	52052	52544	53586	54788	53749	52884	52102	52669	52324	52444	51132	51047	51460	52712	54714	52953	52372	51920	51705	53239	52706	52756	53245	53149	0.165
36.34	51647	51873	51742	51498	52049	52368	52846	54138	54734	54303	52376	52152	52161	52300	52846	50873	51085	51006	52623	54366	53321	52580	52004	51846	53338	53023	53197	53396	53190	0.164
36.356	51532	51547	51374	51622	52118	52358	53004	54140	54725	54050	52764	52055	52497	52524	52519	51306	51046	51499	52146	53802	53700	52537	51753	51743	53431	53078	53335	53150	53379	0.163
36.372	51693	51580	51569	52080	52146	52053	53466	54482	54529	53726	52927	52390	52025	52537	52507	51069	51552	51260	51965	53912	54102	52981	52362	51714	53243	53140	53174	53402	52980	0.164
36.387	51950	51286	51695	52076	52105	52276	53556	54757	53989	53378	52057	52215	52144	52217	52476	50852	50970	51227	51388	53232	54158	52824	52448	51739	52998	53021	53070	52935	53270	0.166
36.403	51568	51624	51678	51539	52033	51883	53881	54722	54035	52957	52580	52656	52093	52305	52441	51164	50971	51686	51694	53034	54243	53363	52444	51841	53442	53130	53326	53561	53332	0.164
36.419	51547	51720	51725	51599	52542	52572	54595	54698	54151	53131	52662	52199	52211	52871	52514	51263	50862	51462	51835	52990	54203	53881	52797	51465	53656	53265	53203	53390	52960	0.163
36.435	52019	51552	51537	52114	52677	52834	54692	54301	53385	53101	52090	52358	52296	52488	52843	51293	51066	51531	51800	52879	53997	54608	52952	52152	53539	53031	53366	53564	53502	0.166
36.45	51681	51875	51939	52108	51903	53119	54901	53973	53676	52959	52256	52196	52179	53097	52361	51130	51769	51438	51890	52558	53682	54084	52766	52288	53084	53284	53260	53871	53236	0.164
36.466	51924	51509	52098	52135	52420	53429	54752	54136	53373	52763	52052	52988	52511	53285	53019	51131	51163	51331	51906	52383	53341	54112	52968	51985	53778	53192	53832	53706	53282	0.166
36.482	51768	51951	51730	52156	52582	53912	54320	53598	53342	52846	52555	52373	52968	52721	52839	51357	51135	51336	51491	52271	53194	54083	53634	52538	53613	53775	53250	53300	53484	0.165
36.498	52225	52034	52085	52153	52976	54029	54652	53306	53016	52648	52420	52475	52658	52924	52555	51193	51014	51606	51438	51814	53217	53696	53360	52081	53738	53156	53543	53674	53443	0.168
36.513	51803	51834	51968	52126	53132	54046	54292	53368	52780	52770	52715	52609	53146	52829	53013	51176	51318	51606	51483	51636	52598	54120	53983	52313	53931	53585	53335	53356	52919	0.165
36.529	51226	51681	51723	52449	53466	54677	54313	53211	52708	53094	52376	53043	52898	53286	52693	51488	51354	51405	52036	52022	52501	53539	54297	52189	54161	53591	54065	52982	53274	0.161
36.545	51770	51965	52133	53001	53578	55102	54328	52892	52770	52885	52819	53431	53355	52786	52912	51689	51738	51289	51535	51930	52683	53538	54531	52717	53886	53962	53940	53347	53677	0.165
36.561	51203	51307	51912	53160	54077	54390	54197	53146	52904	53032	53059	52732	53445	52938	52925	51314	51433	51328	51309	51664	52098	53537	54857	52914	54979	54166	53696	53507	53784	0.161
36.577	51798	52074	51974	53312	54317	54403	53729	53204	53080	53235	52803	53077	53519	53080	53094	51435	51524	51374	51810	52232	52155	52837	54052	53362	54778	53727	53422	53440	53406	0.165
36.592	51953	51887	52713	53370	54848	54599	53831	52924	53317	52781	53253	53731	53763	53182	52852	51744	51434	51513	51925	51799	52090	52621	53955	53439	54964	54216	53336	53563	53466	0.166
36.608	51432	52003	52549	53974	55123	54785	53688	53190	53494	53240	53139	53632	53998	53670	52892	51659	51456	51587	51993	51879	52204	52450	53554	54031	55094	54025	53397	53626	53676	0.163
36.624	51773	52089	52977	54575	55779	54520	53841	53707	53243	53444	53463	54174	54188	53209	52716	51417	51751	51878	51895	51977	52550	51860	53473	53989	55389	54807	53773	53555	53498	0.165
36.64	51847	52587	53686	55210	55175	54751	53473	53457	53465	53806	53867	54105	53927	53165	53130	51705	51625	51723	51899	51779	51859	52225	53222	54025	55965	54664	54064	53504	53651	0.165
36.655	51808	52162	54521	55691	55458	54711	53500	53439	53641	53842	54026	54771	54218	52789	52842	51284	51799	51841	52159	51865	51734	52027	52953	54686	56410	55249	54395	54326	53461	0.165
36.671	51926	52503	55566	55897	55647	54507	53778	53631	53966	53749	53931	54488	54191	53162	53035	51836	51728	51981	51566	52209	51614	52268	52814	54386	56966	55791	54006	54146	53916	0.166
36.687	52365	52526	55792	56407	55377	54826	53934	53687	54164	54694	54454	54283	53837	53403	53025	51595	51557	52235	52429	52282	51953	51859	53383	54561	56469	56375	53697	53368	53735	0.169
36.703	52381	53350	56570	56849	55762	54325	54178	54214	54059	54170	54119	54413	54307	53064	52780	52018	51338	52230	52009	51692	51879	52269	52760	54008	56707	56865	54441	53869	53463	0.169
36.718	52546	52776	56865	56706	55779	54606	54067	54616	54371	53930	54032	54417	53327	53404	52748	51839	51554	51927	51980	52243	51976	52199	52654	54339	56180	57040	54188	53309	53701	0.17
36.734	52807	53860	56785	57096	56044	54908	54617	54029	54790	54174	53833	54347	53375	52834	53800	51776	51447	52162	51793	51724	52078	52273	52516	54373	55983	57076	54361	53932	53298	0.171
36.75	53198	55234	57052	57062	56077	54947	54980	55032	54002	53612	54323	54373	53897	53408	53175	51428	52249	52069	52275	52471	52520	51926	52704	53950	55841	56648	54595	53892	53722	0.174
36.766	54156	55823	57353	57206	55906	54983	54702	54158	54429	54249	54003	54055	53335	53200	53432	51836	52240	52646	51765	51882	51970	52684	52249	53667	55618	56053	55298	54400	53621	0.18
36.781	54515	56993	57144	56788	55939	54710	54461	54110	54274	53970	54146	54045	53435	52910	53342	51884	51677	52485	52614	52063	52001	52217	52079	53272	55694	55812	55528	53916	53441	0.182
36.797	54984	57098	56607	57053	55496	54382	54165	54467	53833	53596	53414	53331	53395	52627	53530	51936	52160	51991	52338	51890	52066	52051	52414	53365	55476	55396	55923	54020	53653	0.185
36.813	54538	58112	56470	56147	55030	54245	54431	54284	53688	53143	53615	53486	53426	53720	53323	52149	51883	52228	52564	52180	52144	52407	52203	52837	55271	56101	56625	53848	53698	0.182
36.829	54739	58113	56353	55611	54946	54279	53888	53913	53327	54117	53446	53127	52761	53279	52958	51739	52353	52566	52539	52301	52382	52300	52400	53142	55068	56037	57138	54244	53828	0.184
36.845	54494	57701	55779	55129	55150	54218	53612	53805	53483	53399	53258	53310	52557	52850	53441	51903	51751	52178	52839	52367	52494	52558	52355	52337	54483	55434	57603	54175	53996	0.182
36.86	54501	56624	55347	54862	54643	54047	53752	53184	53402	53301	53101	53026	52549	52645	53239	51963	51612	52432	52781	52587	52114	52470	52029	52752	55031	55334	57077	54547	54709	0.182
36.876	54871	56367	54817	54509	54283	53486	53558	53492	53574	53549	53476	52900	53079	53472	53317	51884	52040	52326	53075	52901	52049	52112	52455	52740	54795	55235	56958	54547	54701	0.184
36.892	55227	56069	54565	54209	53995	53193	52994	53396	53753	53426	52780	52972	52715	53115	53287	52175	52366	52212	52905	52677	52630	52422	52645	52533	55069	55438	56395	55059	54533	0.187
36.908	55929	55904	54059	53254	53880	52895	52848	53510	53274	53017	52936	53047	52660	53247	53300	52505	52279	52185	52903	52594	52483	52256	52781	52625	54598	54662	56310	55428	55216	0.191
36.923	56183	55715	53577	53120	53702	52858	52910	53506	53183	53410	52753	52757	52565	53404	53362	51646	52096	52568	52901	52821	52291	52299	52631	53166	54481	54791	56018	56063	55698	0.193
36.939	56795	55231	52876	53060	53140	52805	52958	52990	53325	52872	52726	52691	52607	52949	53670	52389	51931	52021	52551	53140	52503	52564	52339	53300	54416	54525	55455	57419	56273	0.197
36.955	57428	54443	52725	52816	53005	52872	52913	53312	53521	53374	53058	52424	52770	53058	53572	52197	52152	52548	52659	53246	52467	52514	52592	52870	54003	54421	55706	57881	56698	0.201
36.971	57044	53755	53238	52335	52654	52709	53327	53723	53230	52942	52773	52641	52706	53315	53419	52449	52176	52100	52571	53443	52956	52729	52933	52847	54306	54367	55372	58043	57684	0.198
36.986	56731	53375	53261	52282	52909	53102	53073	53479	53651	53459	52882	52605	51955	53624	54082	52100	52290	52809	52659	53137	53352	53047	52757	52882	54670	54711	54767	58102	58258	0.196
37.002	56057	53434	52703	52651	52902	52714	53891	53842	53072	52569	52608	52425	52697	53417	53652	51957	52020	53044	53088	52832	53542	53101	53015	53007	54701	54318	55182	56955	57965	0.192
37.018	55793	52863	52387	52678	52421	53208	53405	53358	53616	52788	52675	52790	52741	53537	53567	52468	52418	52413	52629	52896	53445	53086	52782	52599	54245	53990	54554	56359	56973	0.19
37.034	55071	52919	52272	52629	52720	53148	53562	53633	52975	52935	52576	52692	52749	53445	53619	52750	52972	52416	52912	53128	53761	53560	53790	53081	54343	54637	54616	56233	56619	0.186
37.05	54841	52910	52693	52552	52694	53260	53737	53166	52808	52730	52677	52435	52595	53783	53869	52825	52395	52735	53169	53261	53372	53759	53257	52821	54698	54535	54892	56620	56678	0.184
37.065	54993	53130	51953	52614	52708	52971	53867	53255	52739	52864	52567	52591	52955	53682	53899	52484	52549	53017	52403	53377	53628	54008	53630	52971	54756	54539	54677	56099	56083	0.185
37.081	54088	52731	52284	52395	53173	53514	53683	53444	53157	52835	52635	52602	52971	53514	53686	52420	52433	52682	52890	53342	53213	54075	54649	53265	55120	54755	55037	55737	56197	0.179
37.097	53726	53122	52511	53076	53070	54095	54173	53467	52599	52715	52709	52708	52735	53179	53547	52328	52527	52661	52638	53181	53739	54115	54450	53120	54979	54024	54822	55608	55814	0.177
37.113	53437	52496	52860	52515	53266	54087	53805	52736	53492	52599	52562	52954	52514	53779	53599	52477	52874	52993	53171	53017	53609	53884	54529	53388	54979	54413	54821	55330	55169	0.175
37.128	53215	52724	52686	53115	53663	54037	54034	53534	52479	52622	52317	52690	52938	52939	54368	52680	52834	52703	52636	53419	53616	53742	54964	53748	54970	54928	54981	54688	54615	0.174
37.144	53363	52394	53285	53422	53646	54287	53613	52804	52544	52546	52460	52854	52825	53096	54239	52392	52740	52387	53218	52896	53952	53757	54784	53423	55022	55050	54815	54320	54912	0.175
37.16	52910	52776	53477	53959	54286	54248	53781	53169	52729	52730	52563	52539	53042	53386	54154	52868	52659	53028	53216	53004	53534	54068	55029	53696	55868	55373	54666	54692	54637	0.172
37.176	53479	52911	53938	54083	54556	54520	53933	52912	52669	53034	52179	52670	52717	53562	53937	52711	52795	52717	52943	53133	53232	53622	54707	54496	56069	55403	54753	54369	54685	0.176
37.191	52994	52686	54441	54914	55011	54005	53337	53055	52427	52617	52305	52641	52869	53504	54317	52706	52595	53013	52941	53267	53154	53190	54734	54152	56534	55837	54708	54526	54689	0.173
37.207	53224	52409	55545	55315	54475	53860	53445	52854	52897	52183	52789	52820	52714	53716	54196	52694	52766	53335	53386	53143	53307	53801	54112	54844	57202	56870	54937	54746	54938	0.174
37.223	52692	52995	56697	55908	54641	54234	53293	52730	52876	52957	52745	52845	52858	53396	54075	52813	53072	53077	53198	53273	53244	53378	54495	54824	57504	57662	54708	55234	54846	0.171
37.239	52706	53058	57540	56018	55348	53817	52963	52956	52708	52166	53057	52355	52720	53704	53758	52465	52872	52617	53111	52959	52688	53273	53915	55617	57850	58481	54946	55057	54611	0.171
37.255	52713	52971	57588	57007	55343	53757	52897	52407	52399	52801	52236	52646	53212	53609	54424	52594	52877	52704	52866	53190	53285	53505	54117	55062	58243	58876	54970	54913	54761	0.171
37.27	52474	52998	57750	56449	55024	53597	52440	52569	52767	52767	52584	52653	52869	54252	54059	52461	52660	52903	52602	52630	53120	53754	54032	55469	57689	59076	55152	54934	54450	0.169
37.286	52912	53992	57027	56013	54916	53562	52328	52636	52575	52261	52751	52971	52946	53169	54335	53160	53461	52802	53106	53047	52631	53343	53652	55577	57332	58672	55560	54877	54509	0.172
37.302	52978	54631	56138	55488	54590	53211	53045	52829	52716	51833	52747	52724	53105	54089	54984	53100	53441	52974	52963	53342	53427	53011	53703	54839	57243	58295	55672	54621	54718	0.172
37.318	53014	55210	56369	55183	54481	53113	52654	52632	52553	52358	52855	52378	53173	54405	55008	52841	53260	52771	53161	53109	53209	52947	53747	54779	57017	57806	56512	54825	54490	0.173
37.333	52907	56007	55798	55085	54544	53128	52628	52472	52389	52369	52685	53086	52808	53907	55511	53578	53173	53159	53153	52814	53535	53159	53557	54802	56969	57859	57100	54978	55031	0.172
37.349	53103	57323	55305	55177	53828	53380	52697	52531	52377	52928	52396	52855	53326	54894	56054	53251	53461	53294	53037	52880	53106	53073	53338	54085	56689	57546	57491	54855	54634	0.173
37.365	52585	57864	55292	55105	53472	52501	52600	52647	52451	52725	53008	52737	53500	54836	56814	53771	53429	53050	53077	52875	53171	52967	53323	54326	56343	57573	58756	54671	54501	0.17
37.381	53525	58371	54650	54244	53709	52873	52429	52629	52581	52456	52932	53146	53435	55351	57435	54090	54426	53109	53362	53245	53409	53523	53313	54241	56434	57027	59526	54979	54781	0.176
37.396	53976	58387	53801	53403	54000	52901	52890	52434	52729	52814	52600	52994	53796	55626	57875	54509	55233	53100	53060	52881	53333	53125	53364	54046	55510	56157	59422	55204	54540	0.179
37.412	54203	57573	53285	53611	53513	53289	52759	52668	52478	52786	52545	53205	53639	56165	57873	55664	55863	53466	52683	53107	53146	52926	53383	54037	55443	55821	59355	55758	55088	0.18
37.428	55310	56666	52728	53415	53412	52552	52742	52539	52705	52294	52658	53095	54105	56762	57550	56027	56342	53474	52952	53165	52818	53300	53383	53864	55050	55695	58503	56377	55869	0.187
37.444	56071	56231	52949	53263	53099	52379	52845	52669	52540	52752	53029	53236	54816	57119	57919	56200	56673	53616	53342	53049	52975	53310	53297	53412	54977	55431	57910	56904	55993	0.192
37.459	57912	56670	52756	53053	53096	52697	52510	52764	52796	52582	52707	52884	55079	57057	57585	56056	56448	53212	53082	53207	53259	53597	53231	53552	55105	55131	57718	58705	56766	0.204
37.475	58817	55842	52219	52677	53197	52288	52621	52819	52227	52954	53295	53601	55253	56563	57299	55934	55765	53448	53466	52940	53087	53338	53268	53470	54897	54391	57377	58940	57958	0.209
37.491	60065	55022	52203	52652	52817	52716	52707	52727	52784	52685	52650	53537	56097	57007	57583	55743	55998	54042	53247	52950	53065	53109	53405	53206	55030	54911	57223	60521	59475	0.217
37.507	60621	54865	52422	52678	53151	52839	52371	52949	52871	52745	52912	54049	56005	57117	57221	55976	55968	54285	52985	52685	53402	52999	53144	53403	55120	54838	56446	61184	60487	0.221
37.523	60870	53958	51995	52650	52923	52322	52631	52575	52388	52593	53062	54240	55913	56862	57421	56047	56375	54757	53171	53390	53129	53237	53144	53179	55182	54590	56225	60938	61533	0.222
37.538	58897	54112	52426	52707	53216	52669	52816	52683	52704	52915	53060	54305	55723	56964	57377	56013	56737	54882	53663	53190	52846	53092	53583	53544	55027	54843	55569	60053	61523	0.21
37.554	58589	53788	52536	52623	52698	52536	52830	52722	52625	52704	53036	54847	55620	56747	57435	55606	56206	55793	52655	52977	53038	53022	53244	52973	54987	55009	55433	59378	60685	0.208
37.57	57957	52999	52311	52996	52709	52654	52839	52426	52952	52930	53154	55318	55659	57113	57617	55521	55686	55686	53264	53174	53065	53164	53022	52721	54828	54548	54567	58586	59875	0.204
37.586	57595	52457	52724	53118	52653	52676	52739	52917	52974	53112	53319	55602	55873	56732	58172	55490	55168	55845	53238	53578	53316	53283	53687	53051	55087	54214	54482	58174	58467	0.202
37.601	57110	52922	52228	52407	53274	52803	52826	52638	52888	53297	53536	55434	56023	56869	59047	55392	56216	55693	53102	53389	53157	53128	53474	53176	54730	54891	54470	57911	58805	0.199
37.617	56550	52425	52285	52584	52821	52665	53179	52695	52700	52542	53666	55017	55411	56709	60602	55725	56190	55454	53702	52946	52927	53143	53134	52984	54836	54715	54101	57315	58091	0.195
37.633	55486	52157	52509	53052	53161	52881	52802	52462	52739	52975	53923	55379	56349	57609	63171	56376	56424	55634	53703	53211	52933	53561	53421	53176	54905	54608	54366	57834	57853	0.188
37.649	54981	52151	52220	52717	52950	52622	52848	52825	52684	53200	54448	55169	55904	57886	66130	56866	57296	55386	53577	53554	53521	53028	53282	52628	55105	53897	54485	56322	57121	0.185
37.664	54015	52435	52393	52719	52867	52536	53056	52771	52530	53376	54456	55140	56395	59618	70129	57776	58187	55449	54204	53198	53317	53006	53389	53076	55016	54320	54031	55661	56298	0.179
37.68	53115	52131	52089	52304	53032	52672	52585	52889	52952	53068	54681	55293	56362	61477	76536	59692	60856	55201	54858	53005	53305	53141	53368	53064	54871	55172	53845	54802	55894	0.173
37.696	53078	52332	52527	52941	53580	52772	53233	52694	52938	53649	54673	55265	57214	64872	82369	62734	63852	55369	55068	53368	53498	53128	53161	53635	55315	54543	53953	54721	54766	0.173
37.712	52751	52148	52282	52477	52928	53118	52950	53330	53030	53430	54969	55570	58279	68222	87764	66913	69306	55214	54876	53369	53152	53006	53300	53158	54735	54589	53987	54532	54864	0.171
37.728	52876	52296	52171	52802	53021	52948	52804	52799	53015	53845	54580	55855	59033	73947	90201	73039	75710	55465	55034	53173	53339	53163	53201	53287	55228	54161	54147	54656	54748	0.172
37.743	52779	52012	52359	52714	53367	52756	52817	53116	53101	53531	54997	55958	62147	79876	89376	79908	82488	55535	54822	53590	53152	53260	53352	53402	55161	54240	53965	54117	54151	0.171
37.759	52286	52096	52320	53013	52913	53066	53078	52750	53441	54184	55018	55603	65036	85970	85373	86013	88778	56181	54380	53690	52903	53103	53347	53356	55091	54219	54309	54297	53780	0.168
37.775	52314	52373	52225	52644	53486	52986	52916	53522	53711	54215	54826	56434	69471	89641	83078	88898	89801	56416	54901	53966	53175	53054	53253	53516	54886	54542	53471	54035	54290	0.168
37.791	52353	52401	52415	52452	53478	53199	53127	53090	53360	54423	54934	57098	74866	89679	80963	89225	87584	57235	54889	54183	53323	53281	53195	53167	55069	54131	53928	53934	54003	0.168
37.806	52315	52183	52078	52306	53309	53470	53171	52995	53027	54401	54929	57625	80128	86700	79269	84542	83329	58165	55207	53842	53680	53078	53220	53387	54628	54811	54367	54205	53869	0.168
37.822	52678	52233	52125	52873	53572	53651	53046	53234	53728	54231	55113	58761	86394	84001	78755	80855	80290	60003	55469	54515	53261	53157	53417	53270	54207	54189	53586	53593	53817	0.171
37.838	52361	52204	51873	53206	53418	53888	53277	53526	53668	54299	55427	60777	88180	80237	75275	78340	78542	62266	55239	54687	53220	53303	53379	53617	54704	54547	53811	53745	54309	0.169
37.854	52767	52382	52410	52964	53179	54271	53157	53394	53679	54632	55780	63649	88064	79389	72177	77535	77361	66475	55130	54364	53722	53020	53623	53666	54564	54262	54203	54031	54001	0.171
37.869	52591	52413	52379	52890	53376	53506	53824	53858	53966	54815	55958	66711	85065	78412	68848	76721	76741	71872	55547	54597	53768	53186	53057	53892	54900	54470	53888	53807	53801	0.17
37.885	52331	52345	52457	52831	53384	53556	53628	54093	53678	54496	55918	71958	81947	76544	65709	74654	74281	77976	55821	54683	53516	53486	53360	53813	54722	54110	54127	53800	54026	0.168
37.901	52876	52750	52990	52828	53583	53874	53557	53326	54237	54722	57076	77831	80286	73251	64226	71509	70228	84440	55775	54943	53841	53647	53782	53370	54732	54301	54341	54358	53742	0.172
37.917	52499	52847	52872	53008	53122	53908	53761	53890	54414	55254	57776	83768	78756	70548	63156	67896	66438	88499	56417	54914	53787	53773	53097	53654	54959	54228	53720	54129	53700	0.169
37.933	52603	52517	52913	52914	53292	53801	54332	53922	54841	54925	59238	88053	77600	67816	62431	65091	63887	88460	57036	55069	54214	53858	53867	53765	54441	54641	54171	53885	53963	0.17
37.948	52582	52492	52790	52788	53370	53540	54246	54085	54606	55733	60952	88756	75818	65102	62889	63058	61881	85312	58026	54879	54112	53417	53856	54001	54785	54486	53967	53786	54034	0.17
37.964	52463	52606	53329	52208	53403	53746	54305	54252	54587	55921	63959	86252	73277	64668	64259	62073	60908	81872	59633	55303	54489	53867	53809	53624	55099	54457	53853	53398	53275	0.169
37.98	52282	52572	52489	52752	53130	53785	54378	54504	54763	56099	67587	83395	69876	64140	66829	62294	61163	78880	61662	55083	54477	53277	53982	53429	54796	54778	54047	54307	53975	0.168
37.996	52359	52644	52790	53317	53177	53725	54462	54392	54390	56483	72644	80185	68154	65749	70264	63027	61430	77725	65263	55526	54478	53883	53937	53763	54657	54560	54377	54056	53672	0.169
38.011	52570	52772	52910	52974	53476	53990	54527	54775	55262	57549	78858	78939	66996	68018	75101	65381	62765	77021	70313	56214	54775	54143	54409	53617	54467	54250	53837	54137	54051	0.17
38.027	51990	52275	52449	52971	53542	54169	55257	55127	55957	59115	84472	79235	68136	71789	81021	69228	66303	75872	76284	56429	54502	53649	54669	53972	54591	54622	54083	54174	54068	0.166
38.043	52587	52299	52734	53112	53351	53434	54617	55067	55621	60832	89370	78308	69654	76778	86457	74276	70272	73188	83552	56792	55029	54434	54454	53833	54736	53952	54451	53963	53842	0.17
38.059	52321	52072	52796	53361	53574	53759	54659	55867	56368	63545	88898	76481	72777	82156	90035	81313	76221	70531	89352	57411	54972	54986	54801	53017	54858	54240	54373	54048	53930	0.168
38.074	52363	52552	52795	52951	53614	53808	54527	56002	57482	67265	85570	75032	77620	87506	90413	87498	82637	67913	90257	58295	55046	55499	54950	54085	54479	54409	54090	53426	53829	0.169
38.09	52469	52252	53121	53518	53364	53742	54959	56358	58422	72922	82212	74414	82837	90270	87517	90726	88098	67708	86876	60256	55734	54983	54726	53780	54929	54956	54367	54287	53711	0.169
38.106	52055	52393	53067	53386	53659	54032	54880	56376	59803	78522	81669	74608	88210	89549	83749	88857	90232	68994	82498	63247	56353	55520	54521	53633	54561	54331	54484	53776	54278	0.167
38.122	52535	52260	53152	53311	53800	54084	55097	57061	61494	84966	81197	77719	90016	86602	80723	84779	88394	73587	79687	67072	57046	56134	54146	54122	55362	54979	54130	53998	54223	0.17
38.137	52208	52462	53240	53529	54218	54075	55243	57281	64656	89409	81729	82156	88529	82888	78227	80792	83620	77825	79398	72957	57505	55870	54663	53746	55133	54726	54571	53995	53923	0.168
38.153	52408	52424	53712	53645	53762	53876	55150	57799	67888	89071	82301	86686	85874	80188	77356	77832	79751	84064	79704	79398	58950	56155	54647	53822	55592	55202	54587	54337	54065	0.169
38.169	52506	52582	53648	53623	54528	54009	55803	58700	72449	86650	81416	90107	81528	78290	75256	76105	77095	88657	81223	85873	60283	56178	54719	54007	55594	55336	54372	54181	54314	0.169
38.185	52809	52740	54034	53948	54223	54772	55462	60447	76919	83438	82046	90483	79219	76394	72356	75870	76422	91228	80471	90759	61929	56700	55217	53976	55802	55317	54867	54523	54419	0.171
38.201	52607	53050	54636	54579	55229	55166	56228	62518	82491	82246	82912	87366	77135	74579	68430	73243	75349	88121	78932	89775	64604	56947	55123	54300	55642	55887	54911	53882	53923	0.17
38.216	53273	53214	54371	54631	55446	55188	57285	65337	85883	82413	86334	83219	76109	70899	65200	69320	72546	83361	79599	86546	68025	57979	55488	54455	55349	56133	55219	54347	54531	0.174
38.232	53253	53978	54796	55101	56197	55698	57590	69888	86014	83248	89772	80313	73861	67389	62458	65529	68504	78543	81661	81689	73084	58039	55883	54498	56216	56298	55210	54594	54708	0.174
38.248	53768	54255	55259	55179	56380	56150	59310	73515	84151	84673	91738	77997	70751	64014	60462	61976	64572	76567	86137	80061	79221	59353	56213	55186	56813	56226	55584	55119	55065	0.177
38.264	53573	54100	55009	55651	56989	56739	61942	78329	82229	86534	90813	76984	67398	60995	58938	59733	61635	75158	90543	80599	84744	61200	56656	55646	57376	56103	55528	55040	55254	0.176
38.279	53566	54367	55246	55861	57221	56887	63892	81842	80941	87011	86273	75248	64223	59670	57973	57989	59294	74732	91507	82982	87375	63806	57480	56786	57660	56365	56228	55073	55097	0.176
38.295	53790	55113	55382	56966	57631	57973	66237	83098	80967	89180	81797	72534	61373	58838	57113	57148	57092	72124	87786	84359	87160	67308	58172	56474	57800	56941	56384	55535	55373	0.178
38.311	53777	54898	55431	57558	57843	58928	71285	81596	82083	91732	78958	69172	59465	57979	56591	56188	56709	68665	82373	85431	82874	71429	59173	57335	58055	57552	56839	55864	55565	0.177
38.327	53967	55194	55510	58287	58269	60167	74662	79839	82925	91505	77099	65169	57824	57129	56409	55412	55756	64641	77566	88046	79327	77283	60478	57710	58616	57667	56894	56416	55519	0.179
38.342	53512	54806	55785	59111	58978	61935	78510	78468	83305	87764	76242	62709	57346	56356	55841	55032	55215	61036	75036	89095	77992	81726	61958	58563	58888	57566	57450	55733	55383	0.176
38.358	53916	55680	56111	60111	59083	64841	79729	77416	84693	83413	73389	59785	56482	55721	55528	54992	55407	58696	74549	90843	79077	83592	63940	59098	59990	58015	57312	56057	55802	0.178
38.374	53791	54616	56718	61142	60183	67566	80172	77465	86553	78970	70311	58231	56163	56065	55304	53966	55208	57557	73552	90308	80330	83142	66782	58862	60389	58185	57746	56220	55460	0.178
38.39	54143	54939	57215	62212	61503	71450	78107	77504	87979	76523	66346	57082	55983	55753	55288	54030	54580	56609	70665	85493	80694	79805	70712	59464	61047	58055	57287	56139	55372	0.18
38.406	54622	55139	57760	63096	62745	74230	76605	76919	88149	75243	63049	56503	55332	55321	54924	53476	54109	55540	66376	79449	81797	76849	73781	60320	62365	58964	57225	56233	55932	0.183
38.421	55120	55054	58550	64244	64667	76306	75560	76706	85238	74216	60026	56198	54829	54937	54496	53487	53668	55045	62904	74925	81861	74943	78054	61850	63370	59273	57568	56693	56134	0.186
38.437	54831	55149	59592	64551	67543	77061	75059	77774	80877	71079	58638	54990	54696	54919	55093	53489	53334	54757	59340	73302	83772	74747	79509	62897	64993	60340	57543	56431	55813	0.184
38.453	55148	55250	61015	65769	70409	75190	74546	79089	77027	67350	57010	55233	54661	54423	54447	53003	53537	54497	57507	72901	85869	74012	79898	64703	66721	61054	57804	56534	56413	0.186
38.469	55233	55151	62399	67108	72528	74162	74600	81126	74979	64024	56524	54928	54381	54356	54317	53257	53253	54020	56369	71474	85883	74527	77665	66319	68380	62396	57772	56821	56629	0.187
38.484	54632	55427	63930	68764	74250	73155	73176	82485	72812	60734	55642	54179	54200	54619	54158	52912	53218	53776	55669	68542	83107	72346	74667	68704	70520	63433	57837	57034	56211	0.183
38.5	54831	55167	65026	70463	74964	73199	72607	81749	71718	58762	55363	54471	53872	54330	54477	52846	52934	53494	54404	64760	77967	71817	72011	70783	72308	65856	57666	56792	56389	0.184
38.516	54241	55250	65645	73333	74089	72892	73516	79634	69662	57042	55023	54307	53459	54082	54017	52491	52967	53097	54693	60828	72845	72378	71174	73099	74298	67575	58161	56502	56526	0.18
38.532	53906	55265	66191	76008	73901	73212	73971	76465	66367	56213	54258	54332	53767	54019	54085	52386	52422	52896	54608	57928	71632	73809	71125	74798	76592	68949	58301	56637	56387	0.178
38.547	54773	56393	67942	78034	73408	72567	75791	73873	63565	56203	53906	53528	53386	53865	53438	52551	52499	53098	54043	56929	69845	76987	70276	74886	78875	70556	58426	56679	55940	0.184
38.563	54381	56351	70547	78156	73497	72127	77439	71740	60145	55283	54199	53358	53221	53684	54600	53010	52936	52854	53462	55809	69521	79673	69325	74032	79238	71717	58596	56829	56794	0.181
38.579	54354	56789	74273	76138	73861	72480	79175	70531	58438	54948	54005	53618	53830	53857	54093	52437	52603	53153	53320	54834	67408	80542	67888	73642	79222	74426	59475	56743	56300	0.181
38.595	55066	58443	78323	74060	74227	73393	77615	69826	57205	54405	54141	54026	53827	54283	54031	52691	52759	52553	53628	54329	64498	78492	66948	71271	77137	77369	59839	57239	56746	0.186
38.611	54395	58642	81735	72024	73781	74635	76013	67120	55759	54107	53864	53545	53784	53373	54180	52877	52784	52650	53209	54606	60585	74733	67234	70482	75635	80216	60294	57343	56478	0.181
38.626	54672	60951	83404	71400	74209	76356	73170	64638	55776	54225	54006	53779	53750	53949	53887	53099	52733	52800	53001	54122	58646	70990	68584	70164	73064	82162	61737	57526	56575	0.183
38.642	55076	62584	80746	70928	74221	77166	71138	61613	55654	54032	53884	53647	53839	54111	53840	52966	52849	52155	53033	53577	56091	68494	71327	69706	72193	81781	62795	57365	57063	0.186
38.658	55035	63935	77752	69892	74918	76932	69669	59835	54828	53895	54193	53944	53498	53938	54138	52758	52786	52760	53048	53497	55486	67871	74362	68814	71402	79297	64504	57646	57081	0.185
38.674	56192	66549	74065	68889	76169	75519	68564	57872	55115	53974	53406	53970	54057	53816	53807	52576	52438	52478	52812	53735	54724	67253	77114	68761	69668	76693	66566	57850	56647	0.193
38.689	57020	69223	72776	67594	76598	73778	67411	57499	54299	53984	53971	53745	53653	53553	54037	52380	52637	52709	53229	53526	54577	66013	76707	69240	69318	74656	69086	58445	57634	0.198
38.705	57768	71380	71906	66529	75993	71846	64789	56861	54511	54095	53327	53737	53526	53652	53462	52713	52325	52810	53017	53952	54153	63422	74421	69913	67762	72920	71999	59214	58301	0.203
38.721	59596	74190	70942	66776	74472	70126	62899	55568	54649	54069	53546	53823	53415	53612	53852	52372	52535	53020	52962	52910	53947	60555	71131	70615	66636	71640	74414	59477	58714	0.214
38.737	60801	77589	69175	67300	72317	69053	61184	55575	54269	54131	53307	53788	53685	53491	54215	52541	52188	52600	53282	52903	54040	58372	68390	73029	66255	70499	77107	61163	59284	0.222
38.752	63015	80915	66375	68123	70010	68108	59617	55139	53821	53816	53829	54190	53938	53511	53964	52425	52606	53146	52790	53323	53796	56483	67550	74973	65944	68915	79220	62117	61068	0.236
38.768	64400	82452	64353	69461	68399	66260	58326	55389	54238	53399	53916	53787	53838	53553	54017	52596	52548	52926	53398	53273	54002	55439	67080	75282	67156	66254	81621	63955	62652	0.245
38.784	65031	81868	61907	70349	67497	63638	57552	55108	54167	53719	53794	54106	53337	53913	53684	52572	52420	53310	53030	52904	53597	54936	66141	73863	67523	64649	82560	66072	64441	0.249
38.8	65797	79921	60934	71002	65919	62246	57200	55001	54324	53948	53490	53967	53852	53449	53632	52313	52609	52604	52991	53731	53700	54890	65083	70713	68782	63354	81699	67349	65971	0.253
38.815	65697	76997	60078	69855	64780	60394	56567	55244	54450	54585	54340	53990	54094	53578	53927	52600	52346	52767	53134	53434	53442	54303	63206	68684	69993	61937	79723	69335	67640	0.253
38.831	66721	74516	60335	68349	63147	58678	57085	55058	54718	54012	54283	54490	53757	53538	54031	52281	52426	52976	52953	53278	53450	54368	60357	66711	70232	61600	76381	69820	68030	0.259
38.847	68243	72989	60610	67664	60944	57646	56649	55374	54681	53947	54096	54392	53577	53679	53760	52284	52447	52817	53193	53362	53767	54087	58381	65506	70944	62096	73851	70808	68504	0.269
38.863	71775	71124	61584	65975	59619	56604	56432	55298	54869	54215	54631	53978	53747	53932	54162	52822	52371	53096	53002	53364	53506	54596	57789	64767	69628	61762	72700	72722	69238	0.291
38.879	75320	69540	63636	65277	58384	56001	55760	55713	54782	54500	54368	54036	53741	53773	53991	52749	52396	53105	53050	53885	54094	54512	56722	63429	67702	63150	70966	74974	71543	0.313
38.894	78801	67262	65329	64284	57526	55794	55961	55696	55058	54294	54716	53997	54001	53596	54135	52204	52338	52928	53344	53372	54050	55091	56180	61906	66804	63787	69206	78141	74188	0.335
38.91	80540	65141	67769	63147	56873	55285	56080	54903	54992	54190	54672	53978	53428	54215	54000	52425	52593	53199	53735	53518	54182	54883	55924	59389	64997	66094	67372	81265	77271	0.346
38.926	79513	62475	69050	61588	56055	55126	55446	55658	54801	53789	54218	53572	54101	53899	53671	52456	52565	53055	53410	53999	54016	54885	56196	57675	63533	67400	65057	81560	80377	0.34
38.942	76947	60640	68928	60120	55563	54656	55226	54962	54896	54322	54286	54117	53825	54084	54059	52549	52230	52979	53171	53535	54670	55162	55300	56199	62478	68372	62652	79338	81343	0.324
38.957	73758	59687	68117	58710	55376	54575	55133	54707	54322	54334	54569	53873	53779	53914	53929	52105	52714	52824	53440	53997	54073	54656	55230	55270	61334	67936	61375	76022	78504	0.304
38.973	71398	59017	66289	57078	54842	54916	54911	54737	54448	54257	53948	53654	53793	53647	53675	52077	51977	52925	53562	53695	53832	54717	55492	55008	60191	67121	60621	72270	75492	0.289
38.989	70034	58548	64599	56514	54565	54515	54348	54501	54401	55081	54280	53837	53619	53596	53643	52287	52271	52885	53559	53408	53454	54631	54747	54501	59169	65381	60440	71009	72198	0.28
39.005	69706	59156	62971	56095	54742	53462	54161	54738	54424	54237	53761	53537	53637	53394	53330	52407	52262	52790	53375	53385	53858	54551	54346	54223	57957	64346	60412	69612	70531	0.278
39.02	68042	60227	62891	55319	54191	53986	54147	54559	54522	54076	53793	53627	53411	53773	53512	52148	52185	52584	53709	53542	53858	54141	54562	54183	57168	63364	59904	69335	69478	0.268
39.036	66560	61336	61879	54784	54234	54187	54086	54177	54238	54387	53794	53971	53443	53726	53809	52464	52077	52305	53289	53561	53470	54609	54314	53990	56258	62772	61288	67450	69059	0.258
39.052	64021	62994	60495	54330	53261	53495	54261	54138	53992	54031	53660	53620	53739	53571	53697	52385	52637	52313	53071	53327	53811	53872	53798	53844	55478	62423	62819	65613	68084	0.242
39.068	62077	64899	59584	53939	53855	54000	53914	53990	53982	53780	53630	53104	53138	53708	53782	52331	52368	52884	52934	53577	53141	54181	53808	53777	55401	60994	63789	63646	65707	0.23
39.084	59688	67132	57470	53615	53659	53748	53527	54049	54107	53923	53300	53469	53665	53474	54131	52235	52257	52878	52891	53513	52854	53465	53652	53030	54995	59274	65890	61347	64017	0.215
39.099	59253	67605	55776	53644	53380	53993	53930	53966	53995	53592	53664	53858	53530	53616	54195	52010	52372	52215	52736	52922	52629	53928	53405	53315	55080	58388	67134	60693	61684	0.212
39.115	58599	67281	54948	53578	53396	53477	53978	53938	54177	53782	53700	53373	53840	53609	53683	51818	52376	52603	53014	52618	53256	53306	53362	52933	55478	56744	67863	59925	60348	0.208
39.131	59097	66135	54560	53394	53528	53607	53873	53375	53843	53481	53557	53422	53380	53511	53251	52367	52604	52302	52574	52835	53344	53165	52706	53057	54508	55883	67783	59796	59707	0.211
39.147	59738	64500	53773	53229	53474	53343	53697	53688	53807	53503	53445	53594	53562	53532	53977	52301	52162	52557	52727	53540	53306	53180	52910	53083	54575	55749	66147	60477	59712	0.215
39.162	61219	63289	53682	53464	53390	53240	53399	53854	53665	54171	53580	53524	53908	53792	53591	52236	51918	52347	52618	52720	53067	53256	53010	52921	54596	55589	64289	61077	59849	0.224
39.178	63559	62369	53166	53035	53194	53492	53594	53516	53882	53358	53323	53446	53317	53346	53690	52369	52387	52181	51959	53200	53042	53084	53622	53219	54807	55186	63240	62005	61242	0.239
39.194	65619	62009	53490	53132	54091	53305	53514	53496	54108	53244	53383	53292	53430	53758	53868	52070	52297	52488	52454	52835	53238	53207	53130	53028	54694	55193	62005	64523	62662	0.252
39.21	67987	61266	53229	53479	53552	53152	53797	53502	53580	53202	53322	53460	53335	53370	53547	52323	52039	52412	52527	53016	52914	52648	53065	53026	54566	54425	62294	66345	64178	0.267
39.225	68909	59731	53274	53883	53526	53563	53621	54067	53895	53581	53466	53319	53556	53469	54097	52647	52429	52362	52688	53003	53099	53439	53250	53124	54787	54479	61555	67874	67128	0.273
39.241	68045	58179	53216	53512	53542	53719	54116	53811	53925	53618	53626	53492	53493	53481	53801	52656	52314	52665	52623	52614	52893	53173	52922	53228	55046	54727	60187	68923	68782	0.268
39.257	66352	56907	53305	53279	53470	53223	53938	53761	53567	53411	53468	53570	53428	53400	54019	52618	52376	52985	52416	53165	52963	53372	53021	53294	54312	54658	59524	67249	69292	0.257
39.273	64585	55408	53475	53161	53713	53495	53794	53727	53769	53590	53231	53203	53186	53516	53558	52189	52522	52459	52802	52780	53128	53236	53027	53233	54253	54731	58137	65882	67794	0.246
39.288	63491	54453	53569	53524	53263	53162	53547	53778	53851	53602	53374	53386	53735	53580	54356	52416	52322	52409	52614	52843	52878	53055	53435	53100	54389	54465	56267	63524	65860	0.239
39.304	62317	54506	53534	53215	53311	53915	53676	53664	53450	53114	53790	53595	53747	53794	54006	52214	52428	52502	52305	52523	52818	53075	53368	52905	54458	54970	56174	63168	64100	0.231
39.32	61725	53989	53844	53199	52845	53040	53913	53538	53439	53504	53335	53654	53871	53825	54023	52481	52274	52404	52791	52494	53303	53381	53057	53034	54527	54713	55775	62388	63146	0.228
39.336	61304	53776	53940	53543	52987	53767	53816	53553	53552	53128	52963	53279	53473	54252	53540	52758	52958	52383	52145	52896	52682	53597	53419	52668	54394	54189	55531	62351	62624	0.225
39.352	60019	53970	53226	53066	53800	53566	53541	53749	53578	53408	53449	53581	53983	53918	54088	52301	52479	52846	52831	52505	52559	53206	53301	53161	54750	54678	55569	61136	62596	0.217
39.367	58202	53174	53368	53650	53782	53449	53441	53562	53244	53637	53747	53831	53739	54299	54141	52703	52527	52940	52739	52758	52788	52794	53558	53261	54436	54759	55150	59977	61349	0.205
39.383	56535	53165	53828	53216	53291	53724	53654	53897	53697	53496	53325	53457	53759	54188	53983	52704	52642	52900	52460	52873	52879	52753	53518	52916	54809	54652	55287	58188	59974	0.195
39.399	55766	53449	54007	53901	53357	53272	54025	53938	53346	53111	53468	53583	54030	54274	54126	52574	52635	52107	52613	52844	52757	53017	52974	53033	54531	55311	54854	57359	58394	0.19
39.415	54510	53303	53624	53299	53360	53846	53762	53603	53552	53203	53759	53566	53926	54250	54448	52385	52622	52378	52900	52938	52990	53071	52944	53371	54684	54380	54963	56048	57469	0.182
39.43	54090	53700	53238	53417	53573	53326	53338	53093	53574	53293	53242	53588	53849	54319	53925	52565	53090	52423	52880	52615	53248	53277	53205	52754	54686	54959	55174	56056	56352	0.179
39.446	53708	53669	53479	54083	53748	53295	53809	53573	53855	53700	53307	53584	54049	53924	54289	52592	52872	52939	52795	53133	52937	53407	53300	53119	54466	54721	54662	55015	55357	0.177
39.462	53905	53682	53325	53559	53857	53491	53907	53486	53680	53278	53789	53869	53639	54272	53831	52641	53393	52872	53035	52983	52765	52902	53356	53147	55023	54801	54712	54924	55541	0.178
39.478	53547	53764	53406	53649	53468	53687	53867	53500	53417	53810	53844	53688	54032	53904	53882	52114	52608	53017	52794	52490	53181	53121	52713	53245	54747	54970	54821	55514	54830	0.176
39.493	53640	53314	53342	53454	53545	53620	54047	53642	53622	53462	53823	53653	54207	54393	54146	52586	52443	53480	52957	53071	52712	52840	53510	52813	54833	54445	55083	55125	55086	0.177
39.509	53686	53385	53185	53659	53944	53458	54189	53766	53424	53541	53524	53713	54080	54020	54401	52854	52633	53302	53281	52941	53026	53289	53178	52903	54728	54878	54887	54980	54583	0.177
39.525	53088	53377	53393	53770	53500	53518	53797	53744	53263	53698	53619	54035	53819	53903	53745	52616	52632	53071	53176	52431	53117	52982	53224	53005	55299	54473	54823	54818	54761	0.173
39.541	53372	53115	53242	53290	53485	53572	53227	53391	53754	53495	54248	53626	53785	53856	54324	52512	52649	53152	52835	52867	53097	52808	53050	52944	54838	54710	55113	54754	54833	0.175
39.557	53524	53810	53279	53675	53326	53811	53711	53508	53606	53678	53921	53843	53711	53902	54125	52584	52476	53407	53442	53038	53000	53227	53206	53530	54987	54380	55381	54556	54849	0.176
39.572	53204	53701	53157	53347	53499	53417	53539	53516	53903	53835	53732	53992	53937	53832	54466	52766	52987	53096	52814	53201	53108	52774	53261	52655	55333	54359	55094	54852	54949	0.174
39.588	53652	53325	53113	53397	53464	53778	53222	53596	53586	53588	53475	54333	54026	53974	54178	52835	52711	52987	53229	53028	52945	52695	53246	53211	54718	54599	55286	55317	55005	0.177
39.604	53517	53754	52991	53488	53434	53587	53664	53684	53786	53746	53430	54075	54226	54781	54429	52891	52914	52784	53183	52654	53098	53394	53236	53443	54929	54255	55454	55056	54864	0.176
39.62	53306	53310	52946	52985	53856	53691	53334	53585	53745	53675	54207	53730	54022	54718	55235	52504	52393	53082	53055	52982	52917	53191	53416	53048	54697	54505	54781	55083	54540	0.174
39.635	54016	53652	53327	53722	53358	53535	53296	53791	53575	53638	53664	54021	53547	54532	55180	53284	52771	52807	53068	53129	52694	53093	53543	53311	54698	54763	54841	54859	54811	0.179
39.651	53455	53304	53161	53207	53472	53573	53823	53926	53687	53959	54092	53776	53751	54388	55190	53317	53350	52841	53724	53134	53164	52965	52789	53576	55160	54538	54653	55541	54836	0.175
39.667	54070	53439	53220	53206	53776	53668	53839	53729	54296	53489	53477	53870	54340	54628	55846	53668	53416	53292	52991	53798	53189	53380	53218	53050	55047	54448	55244	55020	54878	0.179
39.683	53410	53438	53011	52888	53574	53898	53910	53704	54341	53427	53554	53715	54389	55014	55808	54407	53776	52828	52895	53510	53003	53216	53688	52876	55171	54826	54819	55053	55378	0.175
39.698	53701	53481	53258	53483	53517	53898	53597	53909	54070	53432	54041	54056	54804	55902	56029	54269	54331	52942	53095	53027	53387	53035	53092	52932	54892	54427	54406	55101	55220	0.177
39.714	53215	53176	52775	53430	53685	53421	53893	53896	53904	53410	54274	54370	54782	56302	55767	54438	54903	53178	53244	53172	52738	52920	53576	53280	55067	54318	54552	54885	55082	0.174
39.73	53225	52787	53064	53033	53887	53751	53953	53829	53836	53646	53823	54340	55010	55766	55195	54636	54507	53614	53496	53147	53299	53203	53664	53252	54874	54847	54884	54767	54984	0.174
39.746	53503	53025	53109	53259	53755	53944	53683	53731	54092	53608	54649	54492	55733	55611	55422	54648	54537	53513	53464	53074	53385	53121	53567	53172	54473	54358	54327	54961	54842	0.176
39.762	53931	53240	52735	53347	53368	53493	53956	53924	53670	53655	53931	54617	55600	55777	55161	53853	53990	53729	53264	53008	53465	53131	53463	53267	54985	54205	54640	55143	54588	0.178
39.777	53283	53211	53225	53429	53389	53189	53572	53717	53665	53671	54516	55168	55416	55488	55267	53829	54062	54243	53035	53481	53458	53222	53543	53576	54808	54410	55126	54542	54617	0.174
39.793	53511	53096	53151	52777	53966	53536	53553	53380	53754	53883	54627	55528	55457	55669	55404	53885	53723	54232	53789	53205	53231	53500	53227	53137	54750	54293	54968	55171	54874	0.176
39.809	53318	53380	52955	52790	53443	53685	54230	53965	53654	53676	53930	55480	55181	55227	54953	53682	53699	54159	53784	53338	52692	53471	53206	53086	54760	54526	54723	54926	54588	0.175
39.825	53305	53136	53289	53310	53461	53483	53615	53842	53697	53628	54954	55342	55115	55093	54647	53409	53978	54777	53540	53336	53206	53518	53369	53309	54774	54311	54242	54610	54859	0.174
39.84	53321	53177	53168	53467	53738	53654	53881	53735	53765	54140	54671	55903	55448	54930	54862	53492	53693	54697	54115	53015	53249	53385	53269	53069	54691	54399	54739	54716	54215	0.175
39.856	53079	53213	52765	53079	53493	53843	53902	53856	53756	53746	54718	55398	54862	54640	54198	53468	53585	54441	53772	53236	52843	53407	53487	53051	54827	54798	54931	54288	54125	0.173
39.872	53369	52998	52731	53031	53428	53874	54182	53856	54006	54730	55290	55131	54971	54591	54333	53381	53200	54833	54205	53272	53062	53003	52910	53259	54850	54869	54749	54805	54788	0.175
39.888	53243	52812	53488	53177	53422	53747	53679	54087	53736	54392	55667	55250	54477	54442	54419	52947	53440	53899	54583	53740	52816	53394	53268	52887	54728	54422	55393	54776	54264	0.174
39.903	53240	53256	52750	53622	53311	53839	54130	54277	54098	54307	55184	54904	54533	54448	54400	53158	52920	54141	54858	53427	53197	52970	53725	53066	54818	54829	54573	54405	54243	0.174
39.919	53159	52950	52968	53501	53582	53724	54098	53922	54399	54578	54909	54942	54245	54271	54699	53021	52986	53992	54926	53715	53065	53341	53599	53115	55163	54377	54711	55053	54753	0.174
39.935	53392	52830	53582	53604	53738	53224	53835	54237	54352	54851	54710	54790	54045	54182	54365	52868	52949	53786	54521	53659	52936	53447	53405	53031	54682	54496	54567	55057	54570	0.175
39.951	53483	52608	53129	53396	53753	53790	54000	53784	54673	55073	54939	54934	54001	53962	54701	52498	53138	53784	54348	53952	53282	53123	53939	53414	54828	54417	55005	54323	54621	0.176
39.966	53091	52817	53045	53318	53985	53632	54002	54324	55013	55115	54848	54471	54262	53954	53729	52864	52837	53405	53886	54321	53312	53459	53793	53119	54736	54642	54653	54814	54402	0.173
39.982	53492	53106	53009	52866	53728	53544	54383	54472	54683	55442	54507	54081	54010	54372	54134	52934	53269	53418	54212	54326	53124	53561	53603	52624	54803	54518	54284	54446	54477	0.176
39.998	53108	52858	52954	53272	53292	53609	54083	54558	54315	54999	54351	54081	54187	54027	53809	53127	52427	53237	53800	54209	53506	53431	53715	52714	54726	54196	54280	54241	54641	0.173
40.014	52938	53025	52942	53262	53809	53601	54571	53820	54549	54622	54450	53826	53913	54073	54513	53037	52715	53292	53873	54844	53876	53740	53519	53629	54609	54383	54696	54878	55065	0.172
40.03	53328	52863	52818	53378	53578	53960	54191	54736	54439	55039	54333	54105	53901	53864	53834	52767	52703	53320	53687	54182	53804	53460	54085	53331	54802	54422	54654	54802	54667	0.175
40.045	52993	52554	52782	53069	53179	53767	53890	54646	54444	54097	53871	54328	54002	54011	54046	52960	52594	52550	53577	54347	54006	53721	53398	52870	55105	54865	54672	54080	54278	0.173
40.061	53217	53225	53051	53430	53668	53502	54475	54485	54420	54521	54086	54006	54086	54049	54023	52874	52927	52958	53926	54151	53637	53612	53855	53297	54517	54404	54244	54876	54891	0.174
40.077	53115	53229	53283	53638	53667	53703	54163	54514	54374	54541	54137	53675	54061	54354	54196	52759	53076	53130	53347	54243	53967	54074	53788	53296	54902	54253	54751	54450	54610	0.173
40.093	53229	52669	52867	53374	53896	53910	53808	54818	54346	54176	53696	54403	53644	54329	54711	53125	52793	53319	52791	54262	53929	53460	53384	53100	55111	54416	54503	54553	54495	0.174
40.108	52852	52841	53178	53419	53235	53832	54222	54686	54442	54207	54057	54140	54150	53665	54398	52738	52779	53228	53374	54117	53903	53740	53359	53194	55328	54815	54442	54645	54515	0.172
40.124	52618	52848	53139	53108	53708	53979	53980	54166	54526	54006	53759	54025	54142	53922	54238	53222	52767	53278	52951	54052	53504	53615	53802	53132	54574	53874	54891	54486	54694	0.17
40.14	52693	52928	52858	53258	53446	53727	54034	53965	54728	54211	54218	54099	54209	53805	54456	53335	52883	53311	53388	53435	53966	53715	54046	53352	54603	54962	54559	54311	54761	0.171
40.156	53718	53031	53147	53765	53565	54169	54399	53702	54308	53790	53980	54256	54065	54352	54785	53000	52900	52827	53300	53650	54068	53702	53278	53406	55108	54651	54449	54275	54322	0.177
40.171	53217	53193	52897	53216	53476	53718	54294	53953	54629	54138	54148	54594	54407	54461	54425	52884	52854	53466	53137	52970	53665	53585	53334	52985	54921	54196	54587	54659	54595	0.174
40.187	53160	53212	53497	53238	53626	53918	53749	54114	54472	54086	54382	54372	54231	54534	54412	53206	53096	53255	53023	53611	53816	53548	53598	53130	54994	54315	54428	54577	54651	0.174
40.203	53048	53168	53039	53606	53251	53593	54434	54114	54673	54049	54290	54136	53814	54295	54267	52997	52964	53179	53389	53267	53242	53368	53266	53476	54925	54317	54660	54228	54057	0.173
40.219	53195	53242	53237	53559	53645	53786	54672	53794	54362	54141	54408	54066	54163	54109	54625	52965	52953	52909	53407	53327	53943	53376	53847	53164	54580	54245	54924	54829	54471	0.174
40.235	53447	53234	52975	53309	53690	53916	54247	54056	54722	54096	53931	54293	54006	53754	53732	52956	53188	53162	53373	53450	53659	53663	53624	53110	54613	53849	54378	54205	54202	0.175
40.25	53240	53401	53259	53660	53638	53784	54259	54224	54348	53751	54032	53673	54144	53724	54141	52661	52996	53720	53491	53520	53492	53347	53399	53272	54700	54218	54900	54431	54252	0.174
40.266	52814	52473	53150	53508	53619	53921	53643	54167	53956	53622	54499	53825	54050	54061	54214	52865	52598	52934	53806	53842	53297	53798	53256	52953	54762	54869	54617	54577	54641	0.171
40.282	52524	53084	52887	53332	53631	53578	53945	53731	54163	54063	53838	54307	53920	54004	54344	52600	52901	53074	53347	53130	53240	53416	53425	53622	54829	54579	54618	54481	54654	0.17
40.298	52904	53015	53285	53530	53566	53831	53875	54410	53879	53730	53803	53724	54148	54292	53853	52785	52332	53020	53439	53902	53654	53398	53513	53247	54867	54365	54727	54659	54587	0.172
40.313	53273	53396	52974	53445	53825	53949	54156	54305	54148	54046	54188	54450	54179	54373	54287	53130	53118	53283	52935	53783	53769	53275	53478	53325	54555	54161	54720	54812	54191	0.174
40.329	52940	53212	53381	53485	53880	54425	53905	53835	53572	53485	54158	53915	53965	54268	54374	52900	52834	53533	53678	53586	53412	53513	53592	53574	55041	54422	54455	54325	54524	0.172
40.345	52894	53202	53649	53266	53679	54089	54134	53834	54001	53810	54020	53919	54227	54347	54297	53002	52839	53362	52895	53641	53126	53562	53452	53172	54694	54294	54308	54887	54563	0.172
40.361	53008	53090	53368	53675	53796	53936	53867	54274	53751	53636	54411	54079	54654	54206	54204	52985	52532	52368	52465	53453	53570	53565	53458	53513	54785	54813	54755	54929	54577	0.173
40.376	53271	53516	52686	53448	53943	53649	53921	53639	53953	53911	54111	53943	53666	54574	54254	53293	52883	53194	53542	53222	53370	53602	53557	53649	54982	54972	54482	54586	54855	0.174
40.392	53142	53090	53513	53362	53882	54112	54445	54484	54035	53863	53731	54216	53883	54423	54146	53026	52768	53120	53384	53273	53755	53345	53703	53620	54630	54760	54841	54658	54299	0.173
40.408	53501	53169	53086	53867	53820	53835	54338	54254	54154	54277	53500	54001	54028	54551	54016	52626	52787	52961	53208	53171	53107	53354	53300	53256	54617	54112	54360	54825	54729	0.176
40.424	52921	53220	52931	53352	53936	53662	54112	54045	54368	54166	54169	54113	54436	54037	54712	52623	52920	53202	53258	53478	53385	53297	53547	53367	54651	54729	54436	54326	54768	0.172
40.44	52900	52963	52954	53748	53622	53874	53947	54047	53564	54282	54214	53933	54192	54015	53935	52764	53503	53086	53197	53104	53252	53329	53612	53448	54882	54397	54680	54824	54343	0.172
40.455	53097	53490	53260	53522	54139	53691	53722	54180	53981	53940	53770	54042	53917	54365	54256	53177	52604	53418	52897	53379	53433	53474	53979	53521	55084	54588	54805	55151	54563	0.173
40.471	53588	53481	53655	53980	53720	53624	54134	53805	54239	53925	54188	53918	54168	54470	54846	52929	52874	53015	53546	53615	53928	53156	53570	53581	54681	54646	54468	54263	54604	0.176
40.487	52857	53167	53501	53943	53685	54239	53814	54448	54366	53714	54159	54257	54161	54430	54303	52938	52937	52841	53135	53483	53307	53267	53230	52921	55229	54839	54387	54944	54533	0.172
40.503	53363	53066	53856	53958	53713	54170	54157	53760	54141	53901	54361	54042	54372	54581	54365	52792	53345	53214	53386	53617	53570	53491	53429	53285	55051	54890	54843	54650	54211	0.175
40.518	53546	53204	53288	54146	54037	54106	54249	54475	54194	53790	54206	53840	54247	54206	54250	53237	52822	53111	53425	53324	53682	53948	53324	53226	54899	54795	54957	54611	54567	0.176
40.534	53679	52914	53422	54116	54051	53960	54045	54199	54195	54250	54114	54310	54234	54559	54276	53145	53254	53239	53168	53141	53448	53463	53611	53671	55006	54973	54901	54766	54249	0.177
40.55	53244	53129	53011	54128	53993	54053	54213	54154	54058	54278	54289	54412	53943	54297	54497	53459	53413	53210	53331	53273	53504	53708	53928	53438	54911	54809	55024	54524	54454	0.174
40.566	53454	53468	53739	54395	53892	53868	53884	54218	54165	54143	54029	54291	54334	54540	54470	52872	53592	53735	53260	53080	53653	53917	53548	53615	55522	54610	55174	54635	54709	0.175
40.581	53511	53396	54360	54690	54477	54366	54016	54301	54128	54126	54278	54146	53804	53958	54177	53173	52763	53231	53394	53113	53599	53358	53243	53717	55358	55033	54720	54664	54571	0.176
40.597	53387	53495	53849	54811	54048	54052	54671	53804	54212	54053	54395	54068	54511	54433	54595	52745	52829	53434	53470	53206	53127	53746	53525	53216	55440	55230	55045	54923	55319	0.175
40.613	53518	53150	53945	54861	54038	54113	54570	53891	54041	54270	54151	54553	54329	54604	54494	53383	52615	53277	53271	53782	53556	53845	53721	53720	55464	55034	55074	54653	54553	0.176
40.629	53358	53506	54445	54914	54533	54292	54563	54241	54106	54133	54193	54388	53858	54459	54879	52954	52910	53553	53031	53892	53766	53615	53533	53688	55195	55554	54913	55185	55243	0.175
40.644	53586	53642	54515	54752	55044	54098	54526	54216	54346	54382	54402	54486	54050	54889	54735	53178	53277	53123	54021	53751	53546	53841	53589	53576	55283	55295	55361	54858	54856	0.176
40.66	53761	53446	54300	54631	54185	54169	54497	54229	54295	54211	54272	53999	54528	54661	54881	52996	53198	53371	53025	53477	53565	53406	53754	53335	55811	55721	55684	54817	54860	0.177
40.676	54119	53320	54327	54315	54412	54482	54148	54081	54684	54313	54156	54491	55202	54587	54540	52911	53302	53336	53418	53309	53917	54195	53551	53956	55528	55566	55099	55181	54804	0.18
40.692	53801	53545	54254	54270	54721	54230	54682	54078	54309	54525	54218	54438	54608	54910	55158	53488	53814	53858	53276	53281	53284	53724	53586	54116	55640	55739	55324	54648	54711	0.178
40.708	54148	53300	54377	54587	54900	54076	54319	54371	54338	55156	54715	54881	54550	54915	54760	53576	53525	53764	53348	53605	53841	53661	53582	54296	55720	55361	54933	55541	55317	0.18
40.723	54079	54058	54070	54071	55054	54456	54365	54404	54203	54071	54465	55058	54874	55294	55463	53572	53885	53542	53633	53672	53791	53239	54000	53885	55757	55365	55550	55437	55407	0.179
40.739	53861	54338	54445	54159	54496	54716	54463	55036	54692	54498	54456	54442	54621	55361	55309	53594	53307	53855	53816	53245	53582	53873	54360	53963	55539	55385	55563	55072	55148	0.178
40.755	53476	54433	54378	54014	54714	54292	54272	54074	54736	54152	54551	54798	54899	55047	54878	53468	53524	54031	53499	53846	53863	53791	53621	54548	55671	55668	55026	55115	54962	0.176
40.771	54176	54052	54068	54096	54327	54187	54693	54614	54664	54413	54495	54743	55500	54687	54661	53908	53663	53888	53700	53817	54208	54052	54004	54186	55252	55344	55526	55658	54959	0.18
40.786	53571	54215	53784	53697	54890	54691	54819	54449	54425	54356	54248	54379	54991	55011	54648	53303	53414	53631	53456	53931	53784	53876	53824	54350	55949	55496	55615	54883	55297	0.176
40.802	53817	53849	53616	53976	54358	54385	54492	55043	54819	54112	54357	54055	54927	54739	54981	53818	53685	53516	53637	53467	53701	53640	54254	54261	55566	55156	55422	55189	54912	0.178
40.818	53767	54708	53763	53939	54610	54967	54547	54545	54144	54381	54679	54538	54695	54613	54871	53573	53804	53516	53255	53758	53972	53790	54041	54098	55300	54805	55827	54827	54781	0.177
40.834	53233	54344	53724	54164	54414	55094	54495	54666	54319	54112	54440	55285	55133	54887	54973	53689	53333	54102	53769	53409	54303	53840	54117	54159	55786	54752	55363	54969	55099	0.174
40.849	53384	54175	54145	53920	54399	54947	54436	54260	54419	54359	54494	55195	55057	54473	54618	53916	53219	54100	53628	53710	53587	53651	54288	54519	55199	55081	55766	55115	55058	0.175
40.865	53487	53999	53852	53397	54418	54912	54831	54170	54191	54356	54770	55250	54935	54548	54848	53248	53973	54176	53742	54049	53777	53981	54289	53948	55720	54714	55396	54921	55141	0.176
40.881	53489	53687	54056	53861	54621	54758	54524	54359	54485	54376	54328	54597	54543	55179	54438	53111	53083	53922	53889	53875	53525	53875	53561	54414	55542	54698	55573	55156	55045	0.176
40.897	53575	53851	54168	54457	54194	54649	54754	54595	54303	54311	54807	54759	54981	54849	55150	53554	52890	54035	53644	54007	54085	53805	53826	54110	55031	54897	55500	55425	54864	0.176
40.913	53652	54334	53873	54067	54550	54801	55126	54608	55066	54702	54810	55165	54761	54378	54717	53182	52965	53774	54332	53922	53907	53865	54692	54346	55415	55077	55537	55070	55041	0.177
40.928	53765	54534	53814	53922	54473	55003	55060	54739	54598	54861	54918	54960	54858	54666	54639	53085	53474	54125	54001	54255	53970	53779	54286	54057	55165	55425	55503	55731	55568	0.177
40.944	54364	54146	54152	53938	54134	55376	55052	54347	54699	54358	55095	54885	54750	54906	55017	53760	52902	53958	54245	53963	53785	54018	54242	53953	55871	55555	55560	55654	55354	0.181
40.96	54691	54230	54246	54315	54448	55014	55263	54556	54565	54601	55231	54597	54649	54275	54724	53605	53058	54159	54430	54068	54150	53298	54520	54315	55154	55035	55108	55452	55433	0.183
40.976	54016	53973	54171	54107	54263	54892	55439	54616	54600	54748	55098	54578	54419	54744	54918	53575	53481	54031	54079	53942	53769	53799	54917	54397	55293	55165	55423	55207	55035	0.179
40.991	53852	53875	53799	54230	54128	54519	55576	54617	54716	55161	55041	55077	54567	55174	55358	53395	53670	53934	54188	53979	54234	54204	54584	53713	55701	55351	55550	55594	55675	0.178
41.007	54253	53976	53951	54291	54451	54606	55117	54844	54721	55275	55194	54802	54456	54683	54473	53743	53594	53444	53916	54074	53866	54123	54264	54337	55954	55967	55423	55382	55791	0.18
41.023	53973	53679	53373	53914	54329	54732	55362	55279	55459	55315	54604	54808	54699	54795	55497	54198	53756	53843	54284	54497	54258	54346	54753	53847	55165	55175	55256	55510	55271	0.179
41.039	53849	53554	54310	54751	54620	54710	55345	55469	55229	54993	55412	54666	54740	55410	54899	53336	53408	54042	54697	54668	54339	54435	54878	53897	56046	55293	55096	55204	55633	0.178
41.054	53628	53622	53832	54677	54429	54680	55376	55337	55035	55414	54720	54750	54395	54723	54639	53755	53523	53821	53822	54867	54356	55078	54745	53834	55902	55229	55118	55292	55109	0.177
41.07	53663	54173	53781	54543	54431	54311	55031	55391	55144	55217	54783	54573	54478	54854	54778	53724	53363	53048	54042	54421	54742	54474	54747	53602	55561	55116	55287	55154	55454	0.177
41.086	53460	53920	53814	54504	54325	54809	54680	55252	55509	55545	54613	54860	55128	54892	55135	54173	53171	53617	53823	54610	55021	54933	54757	53968	55616	55374	55303	55489	54884	0.175
41.102	53898	53957	53559	54327	54467	54702	55143	55685	55042	55032	54937	54397	54591	54645	54981	53426	53661	53784	54212	54568	55290	55484	54696	53931	55793	55562	55221	55585	55371	0.178
41.118	53672	53978	54180	54418	54757	54327	55319	55412	54685	55249	54731	54611	55050	54793	54994	53646	53613	53698	54179	54680	54581	54910	54529	54156	54946	55184	55419	55365	55627	0.177
41.133	54235	53978	53691	54660	54498	54494	55339	55548	55082	54919	54798	55022	54551	54875	55377	54030	53931	53994	53882	54303	54571	54532	54368	53921	55482	55310	55569	55585	55742	0.18
41.149	54015	53787	53845	54526	54331	54694	55159	54844	55226	55244	55134	54768	54896	55231	55006	53906	53795	53960	54035	54425	54453	54498	54843	53584	55667	55115	55168	55127	55252	0.179
41.165	53953	53734	54196	54283	54116	54643	55208	54945	55138	55123	54736	54864	54550	55166	54973	54001	53337	53931	54120	54266	54256	54571	54817	53895	55799	55208	55257	55575	55127	0.179
41.181	53610	54159	53987	54361	54465	54344	55435	55149	55239	54991	54565	54357	54846	54827	54945	53938	53539	54255	54496	54433	54743	54177	54628	53689	55858	55216	55683	55278	55276	0.176
41.196	53867	53654	53779	54461	54747	54684	54950	54546	55145	55114	54715	54994	55202	55141	54869	53317	53524	54105	54548	54399	54369	54158	54414	54347	55644	55357	55422	54739	55383	0.178
41.212	53688	54089	54339	54434	54421	54660	54981	55095	55105	54813	55104	54945	54997	55001	54520	53760	53767	53772	54187	53917	55043	54214	54753	54138	55759	55218	55318	55208	55157	0.177
41.228	53989	53703	54163	54381	54611	55106	55347	55993	54951	54615	55290	55423	55191	55213	54931	53554	53923	53775	54134	54334	54522	54377	54703	53879	55929	55031	55433	55313	55370	0.179
41.244	53891	54417	54563	54549	54679	55034	55095	55448	55144	55200	54972	55175	54823	55400	55250	53974	53510	53700	53771	54087	54262	54491	54315	53966	55648	55588	55663	54872	55163	0.178
41.259	54306	53611	54478	54968	54987	54982	54601	55107	55071	55105	54722	55136	55076	55073	55111	53847	54014	54027	54612	54319	54523	54611	54100	53908	56151	55567	55523	55375	54933	0.181
41.275	53877	54074	54342	54607	54790	55160	55303	55044	54816	55357	55333	55134	54750	55149	55334	53837	53546	54359	54479	54025	54563	54580	54725	54214	55549	55325	55785	55488	55792	0.178
41.291	54154	53724	54344	54663	54688	55299	54937	55002	54848	55073	55372	55369	55221	55215	55500	54149	53641	53937	54650	54187	54450	54231	54490	54523	56241	55408	55855	55553	55352	0.18
41.307	53758	54157	54087	54208	55296	54890	55280	55300	55112	54812	55453	55156	55057	55350	55257	53938	54236	54799	54053	54604	54208	54441	55036	54455	56190	55611	55327	55601	55547	0.177
41.322	53903	54076	54108	54498	54994	54888	55259	55625	54793	55243	55290	55477	55215	55018	55434	53897	53970	54155	54500	54551	54758	54849	54671	54668	56059	55649	55479	55870	55277	0.178
41.338	53846	54222	54327	54564	55226	55119	55252	55070	55138	55514	55113	55263	55396	55587	55720	54243	53928	54340	54344	54193	54385	54516	54794	54301	56224	55673	55601	55752	55422	0.178
41.354	53840	54278	54054	54344	55597	54961	55024	55744	55458	54882	55026	55112	55088	54998	55066	53987	53990	54264	54149	54632	54622	54687	54705	54482	56003	55461	55833	55420	55165	0.178
41.37	54271	54098	54283	54760	55190	54905	54973	55046	55077	55025	54647	55193	55306	55215	55242	54136	54251	53777	54406	54581	54491	54825	54742	54771	56176	55930	55696	55587	55176	0.181
41.386	54812	54114	54010	54403	55000	55543	55371	55184	55099	55284	55309	55177	55039	55314	55445	53993	54551	54323	54358	54778	54433	55135	54288	55185	56331	55926	55570	55402	55584	0.184
41.401	54003	53827	54174	54414	55127	55584	55238	55198	54906	54978	54726	55123	55378	55272	55732	53478	54544	54300	54257	54697	54779	54664	54862	54539	56144	55761	55888	55779	55542	0.179
41.417	53954	53852	54280	55082	55380	55178	55523	55271	54992	54759	54752	54724	55436	55293	55527	54258	54271	54590	54235	54379	54356	54512	54563	54673	55747	55305	55499	55042	55293	0.179
41.433	54196	54315	54596	54622	55074	55271	54751	55661	54928	54543	55437	54768	55023	55479	55473	53527	53668	54356	54711	54610	54451	54229	54860	54856	56004	55680	55668	55436	55613	0.18
41.449	53984	54305	54090	54515	54825	55310	54963	55010	54660	54939	55147	54892	55043	55280	55158	53788	54117	53995	54159	54393	54366	54650	54729	54546	56037	55890	55624	55652	56066	0.179
41.464	53668	54075	53948	54672	55032	55316	55235	54846	55281	54436	55207	55201	55192	55232	55473	54215	53846	54170	54756	54950	54667	54530	55042	54791	56021	55751	55901	55656	55334	0.177
41.48	53541	53993	54432	54473	55308	55335	55385	55180	54568	54794	55046	55277	54824	55323	55268	54001	53883	54299	54464	54692	54796	54123	54503	54623	56196	55634	55343	55548	55602	0.176
41.496	54021	53790	54084	53900	55136	55485	55044	55096	55047	55240	55120	55222	55221	55460	54912	54027	54213	54087	54151	53723	54486	54697	54794	54759	56064	55912	55852	55245	55841	0.179
41.512	54507	54021	53928	54503	55529	55784	55325	54696	55167	54967	55236	55255	54865	55397	55164	53790	53861	53880	54585	54263	54412	54745	54531	54883	55925	55680	55602	55491	55473	0.182
41.527	54245	54225	54224	54730	55229	55573	55108	54956	55172	55282	54682	54797	55246	55538	55123	54141	54026	54429	54266	54199	54163	54837	54801	54732	56520	55258	56017	55603	55436	0.18
41.543	54251	53884	53893	54537	54821	55177	55389	55452	55335	55219	55126	55077	55167	55568	55461	53685	53691	54226	54393	54244	54743	54895	55068	54979	56475	55815	55877	55717	55366	0.18
41.559	54267	54180	54135	54823	55293	55331	55162	55080	55407	55087	55012	55062	55698	55464	55449	54266	53873	54099	54139	54389	54492	54787	54514	54836	56002	56034	55855	55648	55658	0.181
41.575	54037	53905	54173	55309	55085	55975	55584	55281	54727	55219	55113	54851	55775	55387	55760	54157	54200	54175	54299	54234	54565	54424	54764	54335	55607	55885	55857	55843	55425	0.179
41.591	54373	54103	54585	54441	55156	55904	55525	55175	55266	55254	54729	54874	55134	55103	55359	54066	53946	54542	54382	54441	54469	54119	55304	54581	56208	55567	55712	55646	55618	0.181
41.606	54044	54615	54203	54837	55492	55253	55790	55149	54721	55482	55133	55602	55137	55467	55265	53832	53700	54496	54280	54614	54123	54684	55409	54744	55850	55846	55541	56080	55173	0.179
41.622	54443	54667	54300	54741	55078	55534	55274	54991	55131	54722	55318	55269	54872	55471	55014	54108	54193	54589	54545	54628	54506	54450	55315	54977	56051	55645	55812	55602	55760	0.182
41.638	54251	54567	54421	54689	54980	55633	55807	55330	55610	55244	55144	55409	55233	55137	55585	54152	54148	54215	54337	54318	54468	54515	55215	54757	55776	55709	55807	55667	56204	0.18
41.654	54074	54267	54453	55004	55297	55640	55876	55046	55346	55558	55159	55300	55353	55489	55259	53980	54239	54054	54107	54533	54368	54629	55181	54573	56426	55579	56087	55748	55754	0.179
41.669	54233	54429	54528	54827	55071	55591	55526	55835	55002	55617	55598	55375	55241	55645	55960	54050	54276	54499	54012	54440	54896	55075	54967	54960	56202	56115	55940	55739	55921	0.18
41.685	54279	54353	54653	55042	55709	55448	55878	55572	55503	54960	55310	55087	54951	55767	55636	54328	54356	54087	54051	55126	54560	54906	55029	54600	56577	55953	55741	55715	55871	0.181
41.701	53769	54538	54925	54562	55499	55617	55459	55427	54721	55104	55594	55593	55689	55582	55899	54284	53995	54553	54035	54298	54849	54930	55130	54582	56349	55925	55818	55853	55508	0.177
41.717	54466	54459	54749	55423	55386	55175	55631	55784	55256	55215	55355	55827	55407	56062	56225	54140	54228	54418	55167	54850	54847	55023	55536	54375	56627	55913	55982	56035	56101	0.182
41.732	54124	54543	55159	55317	55914	55246	55950	55647	55581	54978	55193	55616	55154	56182	56340	54394	54046	54378	54592	54904	54741	55202	55732	54412	56514	55992	56119	56201	55696	0.18
41.748	54775	54344	54472	55052	55529	55673	55681	55644	55053	55320	55151	55367	55551	56196	55773	54388	54539	54695	54866	54592	54764	55425	55485	54826	56349	55944	55894	55705	55763	0.184
41.764	54332	54649	54276	55597	55348	55577	55419	55597	55507	55544	55419	55781	55811	55709	56151	53946	54709	54396	54746	54567	54741	55433	55222	54535	55899	56316	56270	55995	55600	0.181
41.78	54575	54722	54540	55278	55680	55208	55811	56046	55474	55393	56148	55710	55777	56320	56235	54536	54656	54552	54433	54844	54706	55147	55283	54840	56476	56490	56064	56318	55758	0.183
41.796	54283	54896	54833	55304	55477	55410	55655	56312	55599	55136	55438	56059	55892	56464	56638	54821	55046	54756	55075	54779	55150	55257	55227	54691	56352	56474	55816	55437	55679	0.181
41.811	54333	54901	55509	55341	56218	55326	56140	56019	55690	55922	55438	55781	55876	56481	56927	54846	54799	54472	54570	54594	54970	55876	55160	54915	56848	56287	56020	56087	55443	0.181
41.827	54497	54597	55216	55969	55361	55219	55258	55481	55665	55582	55751	55948	55907	56516	56183	55022	55622	54608	55042	54970	55162	54970	55204	55047	56408	56106	55712	55848	55815	0.182
41.843	54449	54836	54293	55782	55997	55707	55905	55602	56284	55719	55546	55717	55619	56595	56194	55351	55181	54686	54905	54684	55211	55405	55116	55016	56931	55965	56114	56310	56194	0.182
41.859	55135	54869	55134	56027	55840	55757	55752	55955	55928	56068	56442	56113	56210	56423	56153	54859	55060	55132	54929	55243	55355	55294	55195	55093	57149	55921	56175	55953	55745	0.186
41.874	54844	54377	55136	56152	56214	55551	56227	56194	56161	56073	55928	55917	56780	56599	56260	55427	54832	55283	54904	54970	55410	55180	55337	55087	56822	56541	56059	56656	56216	0.184
41.89	55370	55349	55116	57331	56025	56213	56104	55584	56000	56222	55933	56147	56423	56202	56231	55485	54401	54956	55103	55065	55479	55490	55456	55297	56882	56002	56740	56611	56077	0.188
41.906	55261	55086	55523	56371	56128	55932	55374	55889	55938	55620	56181	56356	56690	56349	56822	55081	54997	54940	55450	55465	55541	55286	55195	55161	57001	56446	56579	56464	55974	0.187
41.922	54922	55191	55483	56977	56454	55490	56180	56107	56390	56825	56454	56501	56745	56087	56462	54880	54979	55057	55060	55593	55206	55495	55373	55811	57542	56560	56751	56276	56000	0.185
41.937	54752	55189	55609	57240	56384	56102	56054	55988	56345	56634	56177	56501	56699	56990	56364	54764	55121	55434	55319	55586	55756	55284	55177	55555	57460	56926	57082	56398	56099	0.184
41.953	54792	55198	55724	57141	56528	56881	56025	55757	56144	56319	56263	56200	56322	56771	56431	55648	55065	55220	55531	55600	56212	55626	55533	55750	57643	56787	56206	56776	56341	0.184
41.969	55155	55612	56046	57454	57022	56148	56383	55907	56017	56048	56446	56589	56781	56692	56813	55165	55066	56273	55467	55716	55962	55284	55303	55675	57644	57024	56786	56751	56511	0.186
41.985	55759	55078	56455	57284	57225	56164	56060	56586	56081	56350	56660	57009	56843	56864	56210	55399	55211	55827	55944	55740	55637	55296	55801	55809	58014	57456	56652	56877	56568	0.19
42	54917	55065	56395	56951	56903	56236	56096	56334	56643	56154	56580	56394	56829	56386	56752	55486	55435	56106	55249	55912	55884	55614	55813	56066	58592	57139	56745	56541	56714	0.185
42.016	55300	54827	56434	57313	57346	56443	56023	55930	56433	56284	56092	56517	56307	56384	56928	54977	55393	55835	55839	55973	55641	55971	55662	56069	58473	57545	56807	57098	56542	0.187
42.032	54818	55301	56343	57078	57218	56617	55873	55978	55890	56136	56314	56575	56289	56647	56198	55090	55036	55629	55929	55714	55357	55866	55837	55830	58443	58159	57232	57180	56592	0.184
42.048	55057	55277	56874	56585	57178	56479	55861	55841	55966	55737	56047	56417	55831	56252	56395	54988	55096	55555	55350	55971	55660	55666	55929	56335	58483	58202	57480	56540	56233	0.186
42.064	54908	55475	57323	56717	57311	56517	56153	55730	56145	56145	55956	56593	56191	56575	56686	55068	54950	55736	55892	55760	55358	55601	55910	56294	58538	58423	57033	56575	56503	0.185
42.079	54753	55293	57280	56474	56723	56350	55987	56194	55825	55612	56117	56565	55941	56616	56583	55207	54965	55441	55338	55423	55693	55768	55814	56360	58499	57996	56549	56710	56629	0.184
42.095	54949	55507	57197	56688	56678	56608	56162	55983	55850	56064	56119	57020	56247	56386	56384	55434	55072	55374	55541	55866	55664	55446	56069	56466	58159	58294	57159	56462	56834	0.185
42.111	54953	54859	56832	56066	56480	56425	56296	56036	55704	56179	56228	56211	55875	56904	56929	55361	54786	55400	55581	55651	55328	55755	55411	56548	58300	58761	57255	56774	56213	0.185
42.127	54389	55138	56579	56366	56766	56819	56003	55827	56018	56161	56292	56451	56521	56408	57077	55128	55599	55424	55744	55458	55185	55761	55600	56786	58315	58401	57553	56682	56495	0.181
42.142	54536	55320	56613	56231	56516	56376	56405	56078	55355	56214	56392	56397	56522	56671	56631	55609	54904	54903	55498	55481	55580	55488	55753	56461	58564	58710	57025	56655	56671	0.182
42.158	54862	55564	56538	56039	56788	57193	56484	56450	56575	55802	56471	56787	56468	56586	57046	55373	55464	55365	55615	55382	55443	55619	56220	56206	58600	58265	56969	56721	56673	0.184
42.174	55269	55498	56956	56140	56141	57159	56123	56103	56007	55705	56251	56807	56379	56836	56927	55603	55862	55455	55732	55090	55840	55682	55638	56578	57981	58059	57200	56896	56589	0.187
42.19	55524	55405	56552	56250	56208	56475	56525	55895	55953	56412	56978	57170	56852	57437	56988	55257	55832	55441	55285	55735	55444	56036	55999	56504	57870	57859	57104	56405	56515	0.188
42.205	54975	55657	55780	56586	56091	56608	56660	56184	55683	56425	56591	56438	57008	57050	56981	55734	55793	55639	55411	55579	55766	55625	55727	55978	58002	58050	57224	56974	56811	0.185
42.221	55423	56208	56535	56632	56304	56636	57033	56255	56301	56794	57035	57166	56475	56901	57117	55372	55790	56051	55836	56097	55625	55489	56166	56124	58043	57552	57564	57228	56501	0.188
42.237	55094	56615	55882	56447	56443	56931	57169	56374	56057	56760	57073	56575	56960	57401	56592	55806	55872	55815	55828	55998	56060	55510	56481	56093	58106	57654	57957	56545	56751	0.186
42.253	55484	57075	55851	55880	56124	56703	56776	56147	56571	56618	57340	56550	57099	56960	56814	55788	55823	55721	55989	56219	55843	55696	56172	56108	57886	57857	58078	56607	56650	0.188
42.269	54913	56776	55511	55929	55882	56822	56914	56387	56537	57257	57231	56646	56749	56872	57199	55852	55714	55651	56455	55971	55658	56013	56519	56225	57905	57417	58052	57239	56829	0.185
42.284	55096	57081	55563	56122	56096	57132	56847	56975	56790	57352	57300	56334	56726	56870	56772	55910	56017	55980	56963	56366	55983	55753	56741	56322	58024	57798	58391	56800	56635	0.186
42.3	55095	57180	55684	56620	56096	56575	57088	56650	56771	57348	57293	56588	56966	56865	57490	55511	56403	56334	56521	57101	56229	56637	56265	56088	57504	57479	58550	56972	56826	0.186
42.316	55541	57247	55634	56217	55935	57477	56999	56796	57218	57122	56942	57015	56666	57446	57215	55771	56149	55980	56769	56719	56465	56385	56901	56286	58066	57551	58983	57264	57235	0.189
42.332	55906	56702	56159	56091	56023	56567	57393	57706	57510	56993	56751	56850	56973	56946	56862	55817	56259	55951	56415	56346	56312	56547	56947	56656	58127	57715	58583	57037	57087	0.191
42.347	56235	56811	55440	56335	56179	56646	56935	57578	57039	56800	56629	56751	56903	57038	57035	55840	55434	56107	56396	57320	56646	56723	57170	56411	57984	57316	58768	57492	57243	0.193
42.363	57046	56575	55895	55858	56096	57076	57012	57032	57267	57038	56957	56806	57097	57007	57173	55934	55850	55904	55959	56386	57369	56639	57151	56316	57725	57374	59074	57707	57417	0.198
42.379	57029	56468	55313	55907	56404	56624	57444	57106	57292	56727	57104	57194	56715	57364	57142	56074	56132	56041	56062	57137	57354	57033	57866	56228	58251	57551	58581	57854	57683	0.198
42.395	56818	56298	55796	56321	56440	56489	57306	57614	57343	56673	56443	56454	56927	57268	56801	56155	56056	56126	55774	56302	56928	57056	57059	56535	58182	57669	58451	58182	58044	0.197
42.41	57458	56487	55908	56100	56096	56429	57039	57459	57380	57100	56786	56488	56922	57053	57366	55588	55359	56327	56070	56498	57001	56998	57221	56411	58017	58007	58756	58395	58157	0.201
42.426	57275	56334	55955	55732	56604	56170	57315	57679	57249	57057	56544	56921	56425	57814	57512	56131	55842	56290	56107	56545	56546	57129	56852	56380	57899	57378	58256	58656	59023	0.2
42.442	57176	56260	55699	55797	56486	56077	56926	57294	56885	56990	56362	56829	57181	57112	57667	56017	55816	55948	56365	56882	56762	57192	56822	56597	58120	57851	58227	59346	59204	0.199
42.458	57184	56691	55931	56316	56712	56460	57207	57228	57144	56664	56234	56909	57207	56895	58078	56128	55989	56343	55600	56633	56905	57398	57155	56505	58161	58048	58375	58795	59049	0.199
42.474	56680	56346	55735	56101	56471	56534	56802	57544	57181	56507	56539	56607	56845	57411	57760	55811	55508	55689	56318	56540	56376	56990	57224	56548	58243	57857	58631	58656	58917	0.196
42.489	57016	55591	56041	56391	57188	56182	57315	57257	56701	56474	56551	56888	56781	57223	57770	56401	56005	56071	56356	56266	56966	56752	56991	56678	58040	57376	58695	58447	58966	0.198
42.505	57108	56259	56187	56215	56932	56984	57091	56882	56805	56527	56760	57285	57234	58056	57813	55966	56120	56223	56965	56476	56655	57016	56840	57008	58176	57598	58230	58578	58502	0.198
42.521	56869	55923	55778	56435	56959	57330	57296	57403	56789	56718	56652	56961	57423	57688	58168	56167	55929	56091	56147	56038	56439	57038	57087	57337	58280	57948	58053	58881	58273	0.197
42.537	56567	56421	55871	56707	56814	57259	57177	56879	57099	56740	56513	57215	57632	58015	58341	56610	56613	56464	56205	56297	56872	56828	57173	57308	58233	57842	58537	58737	58708	0.195
42.552	56580	55898	55857	56545	56662	57212	57171	57211	56509	56651	56318	57331	56940	58219	58124	57024	56901	56496	56268	56043	56391	56994	56872	56989	58104	58418	58150	58661	58685	0.195
42.568	56760	56188	55781	56373	56565	57000	56853	56870	56790	56718	56960	57384	57493	58373	58377	57081	56742	56497	56232	56179	56328	57043	56823	56639	58107	58444	57643	58792	58516	0.196
42.584	56052	56377	56640	56283	56738	57323	57212	57473	57104	56948	56921	56994	57622	58442	58651	56840	56934	56511	56787	56377	56754	56758	56903	57373	58425	58242	58162	58400	58015	0.192
42.6	56046	56032	56260	56653	56840	57418	57127	57326	56855	56865	56887	57117	57474	58301	58698	56785	56600	56843	57018	56829	56620	56898	56691	56988	58538	58468	57976	57895	57796	0.192
42.615	55711	56206	56306	56850	57086	57151	57210	57390	57115	57086	56775	57250	57855	58256	58508	57266	56964	56991	56321	56736	57190	57138	56895	56907	59005	58510	58062	58413	58570	0.19
42.631	55897	55988	56662	56302	56899	56962	57150	57113	57335	57152	56808	57520	58567	58377	58377	57248	57282	57242	56806	56811	56754	56975	57374	57411	58377	58729	58636	58155	57957	0.191
42.647	55945	55986	56145	56546	57135	56635	57448	57474	57463	57516	57367	57711	58006	58555	58636	57344	57155	56841	56661	57066	56775	56988	57541	57012	59151	58610	58395	57885	58322	0.191
42.663	55634	56029	56624	56899	56782	57064	57540	56938	57222	56977	57418	57626	58246	58541	58842	57286	57130	57120	56875	56990	56916	57390	57621	57491	58701	58385	58380	57982	57682	0.189
42.678	55936	55971	56362	57162	56912	57134	57477	57272	57166	57194	57079	57918	58380	58563	58703	57245	57307	57253	57450	56842	57085	57783	57691	57129	58412	58974	58324	57829	57547	0.191
42.694	55973	56052	56410	56703	56963	57490	57804	57731	56982	57277	57776	58007	58048	58709	58285	57626	57302	57769	57265	56948	57132	57721	57618	57359	58560	58597	58882	57954	57654	0.191
42.71	56313	55902	56066	57078	56686	57413	57722	56968	56808	57546	57810	58121	57992	58473	58755	57262	57378	57989	57216	57298	57119	57361	57645	57362	59036	57855	58573	58277	58070	0.193
42.726	56153	56338	56223	56359	56600	57229	57537	57996	57164	57435	57798	57882	57844	58683	58625	57541	56966	58338	57529	57802	56986	57410	57686	57377	58936	58504	58505	58294	58370	0.192
42.742	55688	56729	56423	56602	56722	57291	58152	57687	56837	57165	57733	58433	58032	58985	59023	57607	57297	58060	57839	57033	57551	57230	58112	57401	59122	58664	58628	58483	57712	0.19
42.757	56211	56750	56562	56627	56931	57022	57911	57855	57386	57429	57620	58111	58159	58820	58907	57208	57314	58297	57664	57267	57354	57552	58190	57553	59180	58647	58517	57886	58250	0.193
42.773	55971	56429	56620	56304	56646	57301	57896	58412	57202	57793	57692	57991	58063	58390	59145	57371	57189	58563	57640	57447	57534	58113	58285	57591	59076	58448	58913	57918	57821	0.191
42.789	56227	56579	56290	57027	57479	57147	57406	57751	57540	57153	58226	58622	58162	58747	58859	57403	57809	57887	57887	57966	57472	58194	58252	57536	59514	58372	58761	58692	58398	0.193
42.805	55865	56256	56263	57276	57280	57580	57889	57809	57683	57396	58199	58038	57610	58674	59295	57640	57345	58251	58162	57325	57967	58217	58031	57367	59055	59168	59034	58195	58352	0.191
42.82	56183	56819	56678	56744	57061	57240	58017	57689	57612	58062	58230	57800	57518	58835	58978	57739	57560	57864	58273	58255	58135	58147	57372	57916	59478	58587	58720	58079	57816	0.193
42.836	56282	56911	56261	56842	57250	57061	57661	58215	57556	57988	58162	58170	58345	58958	59045	57790	57996	58185	58877	58141	57955	57753	58126	57632	59556	58806	58827	58267	58320	0.193
42.852	55959	57112	56625	57385	57572	57582	58090	58511	57761	57878	58015	58238	58197	59037	59904	57931	57329	58440	58850	58116	58557	58199	57899	58165	59572	58846	59019	58926	58296	0.191
42.868	56197	56657	56667	56952	57129	57357	57496	57709	58011	57914	58112	57792	58277	58896	59675	58500	57724	58534	58195	58776	58432	57770	57925	58169	60142	59194	58386	58321	58610	0.193
42.883	56631	56526	56177	57245	57445	57449	57620	57605	57593	58298	58272	58259	58272	59003	59701	58441	58401	58589	58985	58409	58760	58054	58060	58116	60138	59271	59411	59120	58357	0.195
42.899	57006	56414	56799	56541	57471	57428	57690	57699	57778	57847	57820	57904	58061	59240	59507	58010	58730	58428	58668	58585	58613	58570	58405	58022	59771	58871	58916	58530	57912	0.198
42.915	56948	56784	56648	57065	57288	57252	57542	57816	58163	58057	58272	58083	58321	59449	60145	58625	58165	59225	58693	58795	58657	58813	58711	58425	59344	59076	59271	59224	58093	0.197
42.931	56543	56881	56864	56866	57319	57781	57769	58089	58024	58253	58418	57975	58488	59544	60165	59165	58700	59025	58642	59296	58716	58612	58832	58881	59867	58787	58909	58587	58338	0.195
42.947	56905	56497	56534	57438	57166	57092	57356	57842	57927	58005	58577	58708	58243	59420	59944	58699	58693	58709	59068	59235	58744	58660	58632	57865	59577	59192	59245	58668	58744	0.197
42.962	57050	56668	56896	57387	57576	57671	57731	57666	58117	58196	57553	58034	58632	59431	60375	59133	59508	59274	59524	59007	59064	58352	58806	57963	59695	59197	59234	58620	58655	0.198
42.978	56668	56941	56520	57178	57670	57464	57822	58050	57948	57887	58167	58125	57729	59856	60498	59368	59182	58866	59432	59076	59068	58457	58714	58274	59668	59347	58996	58490	58917	0.196
42.994	57044	57146	56644	57114	57748	57409	58126	57941	58423	58026	58463	57764	58477	59697	60361	59510	58855	59129	59098	59161	58929	58750	59102	58417	59979	59154	58974	58676	58858	0.198
43.01	56607	56725	56552	57251	57477	58117	57452	57639	58261	58158	58061	58440	58566	59661	60418	59602	59425	58956	59738	59389	58506	58905	58615	58236	59939	59288	59014	58537	58936	0.195
43.025	57279	57053	57164	57199	57782	57724	57919	57790	58171	58316	58442	58550	58421	59478	60748	59467	59109	59214	59411	59801	58895	58612	58718	58630	59973	59763	59366	58711	58674	0.2
43.041	57031	56834	56814	57120	57933	57589	58318	57837	58344	58029	58124	58044	58793	60305	60929	59458	59434	59408	59191	59092	58583	59022	59189	58321	59989	59306	59367	59204	58722	0.198
43.057	56614	56993	57183	57633	57911	57947	58685	57722	58369	58152	58271	58853	58593	60197	61217	59994	59718	60156	59557	59513	59419	59096	59116	58739	59916	59786	59539	59188	59269	0.195
43.073	56693	57588	57021	57665	58066	57810	57655	58372	57988	58127	58656	58560	58801	60424	60737	60021	59891	60134	60002	59795	58962	59008	58617	58953	59977	59568	59050	59366	58978	0.196
43.088	57218	56988	56857	57528	57546	57947	58338	58279	58026	58198	57802	58133	59052	60329	61083	59777	60371	59815	59753	59426	58927	59113	58854	58828	60193	59910	59482	59509	59550	0.199
43.104	57177	57810	57023	57214	57943	57792	58379	58369	58294	58468	58296	58319	59135	60066	60872	59970	60142	60022	59853	59648	59508	59126	59483	59016	60328	59746	59351	59131	59596	0.199
43.12	57237	57551	57050	57626	58426	57947	58087	58199	58664	58468	59052	58595	58835	60588	61060	59981	59583	60050	59874	59571	59655	58938	58847	58927	60666	60005	59828	59375	59297	0.199
43.136	57348	57323	57382	57339	58528	58415	57916	58302	58834	58378	58825	58897	59414	60323	61220	60276	60749	60384	59860	59482	59417	59156	59406	58987	60067	59709	59966	59788	59355	0.2
43.152	57230	57146	57030	57705	58361	58222	58578	58324	58669	58951	58307	58496	59093	60420	61071	59928	59775	60495	59689	59812	59501	59394	59087	58935	60538	60012	59648	59408	59433	0.199
43.167	57514	57365	57414	57411	58568	58701	58690	58570	58630	58523	58448	58871	59258	60541	61326	60596	60047	60266	59955	59679	60173	59902	59155	58843	60517	60090	59974	59093	58911	0.201
43.183	57288	57296	57445	57618	58860	58374	58404	58474	58699	59307	58913	59104	59215	60462	61159	60336	60421	60513	60059	59499	59907	59446	59838	59006	60539	60099	59881	59817	59077	0.2
43.199	57628	57321	57956	58225	58696	58489	58801	58971	58651	59349	59309	59263	59334	60771	61045	60398	60489	60238	60584	60057	59769	59389	59518	59832	60727	60735	59553	59770	59294	0.202
43.215	57534	57561	58083	58686	58979	58265	58818	59019	58784	59325	59313	59142	60235	60500	61477	60220	60148	60510	60198	60197	59941	59473	59560	59770	60751	60074	59792	59243	59433	0.201
43.23	57484	57890	58057	58515	58696	59117	58592	58703	59447	59447	58915	59492	59629	60350	61114	60249	60769	60716	60278	60012	59842	59968	59846	59415	60841	60252	60514	59536	59269	0.201
43.246	58476	58147	58280	58595	58937	59313	59631	59026	59099	59269	59589	59766	59751	60766	61270	60674	60415	60469	60729	60228	59769	59889	59400	59412	61268	60034	60493	59522	59985	0.207
43.262	57784	58153	58794	58893	59384	58836	59116	59498	59358	59488	59836	59590	60105	60964	61693	60536	60175	60349	60341	60362	60363	59964	59804	59683	61021	60337	60163	59706	59883	0.203
43.278	58148	58107	58365	59393	59233	59269	59331	59374	59540	59326	59335	59999	60041	60762	62018	60575	60875	60908	60429	60485	60805	59966	60350	59544	61499	60324	60405	60040	60109	0.205
43.293	58323	57752	58499	59344	59758	59328	59408	59254	59713	59625	59545	59969	60385	61319	62107	60771	60711	60586	60445	60731	60727	60482	60098	59831	61255	60806	60322	60386	60221	0.206
43.309	58214	58403	58801	59102	59959	59547	59884	59431	59485	59745	59929	60222	60528	61519	62048	61012	60907	60653	60353	60579	60546	60050	59773	59762	61525	61000	60279	60056	60364	0.205
43.325	58429	58477	58730	59801	59858	59525	59755	59595	59979	59621	60419	60133	60418	61550	63012	60235	60952	60969	60650	60618	60748	59953	60232	60504	61517	60883	60982	60107	60427	0.207
43.341	58325	58334	59375	59855	60504	60046	59737	59827	60480	60340	60564	60007	60833	61722	63045	60719	61392	60919	60852	61005	60646	60366	60061	60175	61937	61544	61127	60359	60299	0.206
43.356	58324	58699	59789	59642	61403	60450	60206	60123	59714	60000	60209	60454	60737	61787	63043	61220	61267	61265	60918	61391	60335	60898	60585	60434	62186	61289	61005	60668	60404	0.206
43.372	58776	59052	60078	60235	62060	60629	59971	60126	60456	60469	60493	60833	61586	62092	64095	61833	62497	61102	61125	61167	60791	61169	61158	60413	61864	61903	61457	61275	60984	0.209
43.388	58856	58730	60065	60635	62299	60886	60652	60343	60418	60835	61159	61281	61229	62739	64376	62353	62561	61221	61597	61494	61171	60333	60808	60408	62120	61677	61077	61193	60782	0.21
43.404	59536	59330	60142	60964	62094	61305	61084	60731	60717	60491	61151	61133	62108	63364	65300	62730	62914	61491	61402	61412	61504	61287	60836	60866	62643	62200	61369	60773	61020	0.214
43.42	59239	59156	60426	61588	62762	61107	61257	61371	61041	60720	61354	61634	62200	63417	65817	63339	63644	61976	61492	61653	61749	61589	60847	61016	62442	62397	61426	61618	61097	0.212
43.435	59511	59663	61554	62495	63784	62069	61193	60794	61558	61172	61273	62081	62628	64444	66933	63579	63992	62377	61877	61844	62045	61405	61620	61215	62438	62509	62510	61464	61373	0.214
43.451	59674	60161	61554	62663	64635	61724	61636	61249	61344	61650	62057	62085	63004	64971	67270	64289	64394	62122	62009	61983	61745	61639	62070	61867	62873	63291	62089	61920	61690	0.215
43.467	59910	60734	62533	63573	64598	62132	61895	62064	62361	61938	62500	61988	63391	65816	69294	64797	65286	62663	62571	62310	62645	61549	61931	61946	63769	64323	63027	61888	62263	0.216
43.483	60581	61140	62906	63970	66097	62978	62028	62173	62321	62280	63020	63000	64045	66271	70582	65705	65799	62973	62810	62336	62568	62685	62260	61854	63605	64584	63090	62839	62997	0.22
43.498	60656	61711	63889	65152	66270	64031	62843	62538	62234	62650	62520	63036	64530	67305	71942	66496	66881	63194	62972	63213	62678	62638	62674	62479	64398	64833	63899	62844	62763	0.221
43.514	61406	61878	64716	65645	68229	64058	63142	62977	63142	62820	63399	63818	65125	68069	75027	68245	67988	63892	63609	63173	63130	62977	63161	63149	64437	65731	63609	63630	63406	0.226
43.53	61808	62347	65620	67233	69072	64994	63274	63360	63334	63340	63453	63819	66095	69386	79002	69173	69314	64679	63669	63451	63438	63256	63117	63086	65488	65827	64367	63938	63858	0.228
43.546	62402	62875	66368	68363	69849	65157	64163	64213	63689	63725	63980	64565	67054	71078	84673	70612	70825	64588	64386	64150	64167	64114	63894	63685	66235	66944	65030	64130	64187	0.232
43.561	63021	63410	68912	70170	70933	66215	64574	64486	64550	65160	64546	65178	68460	72310	91840	72844	73171	65938	64557	64373	64669	64140	64287	64014	66752	67494	65864	64565	64434	0.236
43.577	63938	64534	70696	72329	72138	66993	64941	65127	64929	65113	65255	66065	69522	74323	101194	74240	76236	66452	65267	65042	64806	64708	64914	65499	67400	67977	65623	65502	65566	0.242
43.593	63616	65082	73857	74739	73827	67464	65533	65851	65470	65724	65858	66852	70665	77314	113390	76908	80066	68041	65654	65558	65419	65512	64919	65443	68656	69899	66935	65974	65420	0.24
43.609	65242	65797	78148	77119	75259	68750	66416	66749	66129	65891	66143	67920	71933	80981	126061	81990	86172	68487	66406	65787	66166	65801	65904	65782	69108	71134	67033	66339	66644	0.25
43.625	65732	67295	84048	79570	76986	69891	67755	67174	66704	67028	67844	68779	73091	85979	138062	87121	95435	69336	67675	66701	66904	66738	66949	67262	70402	72558	68259	67259	66872	0.253
43.64	66185	67795	91546	83460	78132	70858	68438	67507	67785	68031	68109	69994	74864	92604	145043	95608	107205	70679	67991	67986	67928	67450	67362	68265	71734	75195	69509	67926	67633	0.256
43.656	67183	69037	101351	86496	80431	71620	69111	68712	68257	68305	69414	71079	77414	101772	149397	106678	121333	71776	69026	68546	67904	68273	68104	68885	72910	78808	71109	68426	68248	0.262
43.672	69115	70308	112513	91235	82650	73307	70524	69502	68944	69449	70350	72630	80438	113921	151064	121389	136075	74237	70355	69733	69281	68719	69167	70451	74271	85171	71957	70328	70098	0.274
43.688	69342	71765	124254	95767	84781	75043	71464	70669	70296	71055	70939	74405	83073	128725	153015	136436	145898	75781	71231	70157	70141	69760	69787	71263	76325	92819	73417	71504	71156	0.276
43.703	70399	73850	136596	100994	86912	75901	72561	71878	71699	71648	72703	76039	88324	144658	161190	149723	151042	77602	72832	71918	70865	70946	70699	72331	78024	103396	75175	72305	72473	0.282
43.719	72310	76140	144047	106770	89856	78116	74216	73121	72362	73362	74367	77239	94421	159115	173355	159663	152999	79306	74409	72837	72105	72404	72063	74398	80627	116049	77046	74460	73877	0.294
43.735	73241	78199	143084	113982	92326	80249	75035	74117	73438	74104	75440	79566	103465	170118	190587	165098	156724	82167	75195	74162	73170	72698	72879	75597	82741	129158	78925	75964	75684	0.3
43.751	75240	81870	134960	120436	95852	81955	76699	75185	75133	75563	76986	81948	116147	181283	208361	172243	165349	84660	77493	75807	74832	74197	74520	77760	86630	138124	81432	77798	77162	0.313
43.766	76629	85781	126005	127463	98716	83669	78285	77140	76161	77162	79008	83849	132874	194087	221776	185215	181674	86483	78357	76417	75933	75278	75683	79621	90316	139984	84167	79955	78676	0.322
43.782	78341	92368	119383	135912	102015	86383	79732	78801	78142	79432	81515	87369	155429	209818	229261	205401	202693	89856	80587	78553	77655	77102	76953	82447	96710	134648	87161	81375	80737	0.333
43.798	79831	99902	116915	143093	106027	88127	81701	79551	79068	80364	83235	90132	179289	226576	226723	225763	225490	95003	82095	79763	78287	78488	78818	85452	104703	127631	91910	83375	81847	0.342
43.814	81597	108927	118622	150299	110185	90541	82645	82137	81308	82669	85619	94912	203761	238453	214734	241725	239869	100749	85333	81418	79932	79437	80203	88487	114503	123053	97014	84918	83659	0.353
43.83	83787	119441	121551	158257	115395	92522	85213	83475	83724	84740	87750	101312	224769	244203	195687	243784	242566	109784	87579	83778	81820	81238	81574	91878	126172	122141	104965	86987	86031	0.367
43.845	85929	132138	121238	164095	120546	95469	87419	84706	85581	85884	90361	108587	238183	236433	179606	233963	229275	121970	89003	85507	83078	82506	83109	94544	138245	124615	113389	89350	88887	0.38
43.861	88136	143696	117146	168491	126059	98556	89125	87260	86855	89082	93001	120015	245452	221639	170035	214562	209042	140549	91056	87847	84920	84063	84730	98375	149687	128183	125370	91443	90333	0.394
43.877	92386	151846	111561	172648	130486	101393	91099	88691	88950	90245	96564	134363	242231	207028	166549	196193	187188	163631	94365	88570	86660	85217	85980	101908	157961	127930	137644	94597	92283	0.421
43.893	97472	153970	107546	176582	134722	104786	94063	90222	90469	92754	100441	153870	233978	193929	164292	184738	173662	193721	95630	91470	88813	87236	87710	105277	164824	126244	149909	97086	95443	0.453
43.908	104346	147415	105770	175445	137001	106954	95161	92604	92441	95046	107327	175788	224433	185841	161172	177419	167744	227147	98641	92638	89618	88671	89447	108169	169195	122327	155803	100873	98704	0.497
43.924	113781	138467	107610	171951	139600	110032	98002	93957	94619	98114	115241	199040	218150	179193	153411	174388	166966	251011	103229	94214	91037	89171	90683	112665	173987	119334	154658	106119	102637	0.556
43.94	125422	130594	111315	164154	139400	112953	98930	95349	96588	100946	125712	216339	212869	173456	142435	168794	164420	260538	109395	95798	92939	90035	92040	113719	174660	117715	145873	113760	108604	0.63
43.956	137809	127430	117412	157494	139020	116794	101164	97163	97895	106483	139197	225674	208417	162587	130801	159402	159498	252157	118129	97847	93642	91854	93182	116792	175035	119591	138582	122894	116692	0.708
43.971	151577	127763	125604	149177	137853	120548	103813	98582	100756	111682	155086	227864	202181	152972	121739	146649	145940	231563	130755	100195	95100	92646	93959	119844	173303	123544	133236	134253	126686	0.795
43.987	160943	128630	134601	144584	136476	123207	104518	99846	102888	118554	170050	227787	191663	140697	114328	134186	132488	212499	148134	102807	95591	93685	95159	121116	170704	128627	132847	148257	139111	0.854
44.003	159188	127321	144711	139657	136542	127957	106949	101109	106989	127596	181829	227035	176351	130095	109282	122580	120017	203588	166876	107287	96275	94422	96420	122537	166137	135646	134561	160076	153615	0.843
44.019	148303	122921	152199	135162	135633	130912	107675	102251	109397	137136	187145	225165	160333	121078	106061	114270	111656	204526	184665	113868	98299	94545	97566	123557	161571	144812	135675	164903	163325	0.774
44.034	136251	115635	155457	129457	135068	134265	109445	104215	114498	146716	184842	223296	145913	114196	103848	107716	104352	206795	194972	122793	98732	94786	98626	124026	156838	152524	133637	158875	163631	0.698
44.05	128046	108730	152059	122610	134144	136451	111202	105331	118920	154615	175967	218732	133976	109415	102520	101967	100370	206185	192624	135372	100576	95130	100080	124239	151586	156251	128284	147179	154050	0.646
44.066	124698	103156	142490	115051	132591	137766	113096	107700	123732	161407	166415	212742	125619	105081	100375	98205	98039	196324	179031	148975	102649	95328	102117	125462	146226	153492	121000	136518	141210	0.625
44.082	124576	99528	133378	108081	130844	138176	114734	108714	128028	167257	158330	204500	118954	102071	98575	95225	95040	178868	163952	162356	106174	94862	105219	125214	139956	146883	114989	130449	132776	0.624
44.098	124459	97304	126874	102774	129530	137352	116989	111848	131355	169597	155247	193398	113533	99486	96796	92736	92850	158724	153731	171688	110462	95684	107608	127426	133841	139143	110124	129251	128044	0.624
44.113	122788	96359	122431	98730	128778	135943	119351	114045	132647	166387	153471	182164	107875	97137	96393	90126	91556	140860	151111	175400	118650	96408	110364	128214	127850	132831	106942	130767	127716	0.613
44.129	115114	95798	121619	95306	128895	132953	121049	116735	135417	161476	152104	168336	102946	95506	95025	88723	89045	125732	155782	169632	127200	97675	112829	132052	121552	129641	104991	131050	129278	0.565
44.145	106340	96231	119634	92618	129684	131122	122584	118938	138658	151995	151412	154480	99209	94370	94009	87205	87805	116107	162237	157437	137575	100209	115663	135929	117178	127490	104170	126751	128769	0.509
44.161	98149	98028	114874	89467	130524	129698	124388	121428	141971	144627	150739	140943	96189	92693	92118	86058	86993	108456	165577	144225	145767	103659	118204	139641	113078	125949	103874	117784	121795	0.458
44.176	91767	101027	108287	87485	131494	126823	125988	122540	145211	137561	150076	129791	93803	91278	89813	84625	85644	103577	168055	136072	153232	107715	120941	143873	108777	122026	103277	108902	113127	0.417
44.192	86985	104827	99688	84765	130939	125484	126574	123399	147275	132673	154100	121185	91167	89550	88623	82597	83648	98637	167906	132643	155410	113280	123175	144636	105328	116128	105590	101878	104165	0.387
44.208	84185	110454	92843	82521	130114	124942	127139	124402	144786	127797	160449	114750	89137	87574	86354	80905	82265	94875	168912	130975	152844	118941	124725	145713	103072	109618	108524	96631	97761	0.369
44.224	82007	117711	87191	80556	127981	123598	128077	125946	140070	122793	170134	108354	87371	85457	84323	78696	80559	90478	168033	129035	145972	124850	126535	144296	100227	103003	112365	92786	92062	0.356
44.239	80579	125547	83060	78656	122603	123350	128338	127605	133322	116280	176842	103336	85829	83489	83154	77364	78520	86513	165175	123649	136766	129757	125149	142445	96784	97254	117940	90041	90033	0.347
44.255	79404	131617	80480	77393	115443	123880	128891	129157	125800	109399	176422	98144	83446	81903	81746	75602	76375	83941	158038	115070	128520	133034	124712	139600	94331	92605	125287	87549	87066	0.339
44.271	79067	134458	78375	75997	107895	125581	127037	129517	119896	102261	169979	93836	81871	80699	80991	75424	75893	80897	151943	105064	122506	135581	123108	136964	92001	89140	131763	86594	85202	0.337
44.287	79926	131983	77084	75238	102826	128055	125843	128653	114985	96611	160304	89634	81380	79967	79569	74033	75033	78496	144982	95961	118792	134699	120087	133497	89912	86992	135508	85496	84085	0.343
44.303	80961	124166	76115	74459	97992	131238	124374	126765	110963	93484	149851	86793	80251	79132	79032	72889	74397	75986	140491	89625	115920	132010	118333	129303	87494	85000	132669	84517	83142	0.349
44.318	84547	115262	74883	73688	96193	133662	122527	123835	106782	92008	140947	84689	79537	77721	77628	72301	74184	74522	134581	85831	112536	127046	117113	123727	85731	82904	125206	84732	82837	0.372
44.334	90087	109020	74295	73017	93093	135985	121938	119629	102699	92159	136582	82498	79404	77658	76463	72048	73078	72643	130098	83261	105849	122001	117124	118157	84154	81641	117051	85629	83505	0.407
44.35	97459	103498	73019	71790	89729	136089	122452	116526	99306	93866	134246	81374	79030	76210	76111	71080	71937	71245	122390	81982	98012	118022	117591	112784	82054	80067	109326	88586	85552	0.453
44.366	106199	102735	71934	71281	85640	132751	123381	112883	95011	98516	131525	80693	77875	75993	75533	70943	72244	71008	114458	82061	90599	113580	122267	107120	80059	78153	105416	93002	88561	0.508
44.381	116826	101736	70897	69915	81625	126149	125864	110059	90777	105082	124932	78791	77171	75348	74924	70586	71138	70940	107082	81938	84683	109821	129507	102622	78952	76514	103747	99087	94539	0.575
44.397	126649	98959	69743	69782	78052	118419	129260	108977	88232	114970	116279	78330	76646	74492	74846	70090	70156	70380	100098	84659	79897	106419	141139	96987	77405	75499	103341	107548	102036	0.637
44.413	132997	94325	69735	70031	75518	111763	134230	107776	86418	127425	108024	77201	76416	73961	74084	69904	70019	69606	94335	87943	77238	102630	152704	92507	75964	73660	101111	118776	111667	0.677
44.429	131992	89113	68945	69717	73622	106805	137713	106587	84388	140253	98378	76387	75581	73741	73890	69612	69455	68987	88783	93974	74588	97910	159981	88005	74085	72939	96247	128181	122762	0.671
44.444	123054	84152	69589	69936	73067	104448	143742	105928	84176	152371	91597	76160	74749	74073	74395	70079	69526	68845	84008	102361	73816	93830	159659	84610	73314	71794	89960	130828	131328	0.615
44.46	113100	80183	69685	69764	72435	102292	146195	106364	83445	160978	86535	75269	74799	73502	74647	69286	70060	68539	78256	112175	73262	90676	147941	81177	71685	70843	84873	125378	130256	0.552
44.476	106528	77941	68994	69638	71767	99330	146595	107706	83011	162065	83083	75100	74218	73327	75601	70181	70334	68419	74416	124351	72772	89618	133553	78425	70928	69716	80632	114049	121198	0.51
44.492	103672	76004	69489	69916	71037	94194	142752	110076	82770	156798	80235	74852	74569	73986	76654	70664	70505	68928	72272	135698	72370	91229	122348	76277	70089	69016	76923	104367	109927	0.492
44.508	104157	74501	69300	70089	71101	88541	133873	115153	83641	148171	78691	74866	74551	74550	79138	71450	70547	68589	71704	143209	72993	95970	117013	73875	69317	68100	74670	98793	101691	0.495
44.523	104777	73718	69581	70088	70540	83001	124596	121196	85125	138970	76875	74450	74760	76261	83213	72316	71989	69043	70150	147330	73592	105860	116150	72411	68148	66982	73341	96840	97466	0.499
44.539	103746	72172	69036	69023	69318	78193	115743	126837	87340	131916	76746	74271	75658	79139	89885	73951	73704	69112	69396	145036	73131	119999	116488	71213	67549	66664	70790	98118	97465	0.493
44.555	98701	71456	69244	68682	68447	74344	109944	133363	90573	129039	76032	75486	77582	83326	99826	77727	75964	68627	69594	140944	73719	136419	114982	70090	67350	66356	69787	98505	98997	0.461
44.571	90270	70055	68591	67933	67590	71772	107058	139294	95448	127492	76261	76048	81605	90816	113922	84436	80954	69708	69416	134686	75019	150732	109499	69041	67303	66085	68648	96145	98152	0.408
44.586	83829	69182	68770	68266	67196	70158	103660	142217	101553	125272	77164	78626	86766	102066	131169	94674	89155	70656	70050	129090	76433	156513	100274	68101	66437	65889	67953	90027	94483	0.367
44.602	78260	68255	68780	67321	66227	69051	100129	141538	110930	120937	78195	83743	96545	117397	150393	110861	102271	72380	70246	123795	78940	148702	91181	67747	66869	66508	67134	84284	87484	0.332
44.618	74633	67391	68697	66914	65796	67389	94276	137349	124099	116718	81605	90756	110249	135241	166217	131183	120037	74931	70313	119515	83054	134362	84175	67341	66284	66118	66769	78857	80585	0.309
44.634	72553	66586	68034	66728	65880	66815	87534	129143	138794	111699	86431	101478	127382	154410	174515	153321	141833	80313	71879	115560	89931	120484	79001	66869	66319	66169	66052	74673	76287	0.296
44.649	71102	65732	66856	66675	65271	66131	81095	119532	157456	109890	93717	116063	147501	169016	174411	171475	163182	88408	74143	112286	100842	112963	76013	66009	66457	66649	65509	72140	72880	0.287
44.665	70075	65040	65965	66264	64897	65314	75260	112401	177744	110753	103626	134712	166116	175427	164087	178277	176514	101352	77186	108903	114951	112245	72802	66026	66106	65644	64509	70586	70963	0.28
44.681	68363	64193	65400	65613	64350	64888	71646	108323	195663	115969	117910	156014	174706	169717	148408	171863	178182	120854	82308	105967	134922	114704	70860	65373	65711	65187	64589	68539	69550	0.27
44.697	66704	64065	64842	65065	63896	64200	68896	105269	207527	125471	135501	172942	171263	156407	137261	154538	166116	143653	92855	104661	157043	116825	70373	65357	65460	64662	64320	67041	67812	0.259
44.712	66009	63728	64136	64750	63848	63173	67051	102617	213166	138332	153762	177135	156938	142235	131971	135426	146386	167292	106717	105682	176245	112780	69043	65457	65034	64924	64209	66671	67027	0.255
44.728	64121	63408	63784	64035	63627	63110	66032	99525	210193	152116	167894	163229	140392	132430	129631	125864	132018	180442	126314	112279	182324	104450	68581	65092	64704	64114	64041	65837	66227	0.243
44.744	63900	63206	63726	63161	63134	63373	64576	92428	201910	161385	171425	142928	129558	128077	128505	122636	124870	175161	148961	123870	175262	94553	68404	65622	64020	64387	64196	65423	65920	0.241
44.76	63804	63294	62219	62902	63491	62471	64797	86726	191243	163518	158739	128121	125592	129319	125266	127283	126093	154565	171700	142177	163191	85904	67273	65244	64441	64055	64605	65580	65516	0.241
44.776	63179	63445	61587	62865	62689	62544	64109	81005	181856	155483	139934	119621	126466	128689	118778	128573	127627	132507	181362	162787	156758	80310	66800	65512	63996	63602	65075	64886	65123	0.237
44.791	63141	63098	61108	62857	63319	62445	63321	76611	173013	142475	125335	118914	128429	125586	107475	125424	127501	118962	169056	175154	159456	75574	66952	65256	64289	63124	65150	64518	64879	0.237
44.807	61957	62857	60897	62375	62801	62320	63094	74314	164630	128281	116704	122720	125750	116796	96592	116001	120665	116363	143032	172869	168315	73635	65712	64686	63631	62792	64634	64137	64252	0.229
44.823	61386	62888	60798	62732	63166	62218	62805	72694	156696	119412	116135	124190	117933	104658	87978	102226	108847	120977	120681	153612	178277	70867	65163	63730	63843	62203	63951	63449	63988	0.225
44.839	61280	62162	60638	62047	62529	62155	63166	71975	147124	115960	119297	118518	106572	94627	82243	90712	95684	127361	111155	131350	180902	70310	64128	63687	63833	62104	63731	63349	63259	0.225
44.854	61193	62168	59949	61501	63139	62410	62445	72144	135447	115540	120338	107332	95073	86360	77928	83016	85919	126357	112561	115068	174891	69340	64599	63472	63734	61776	63832	63307	62962	0.224
44.87	61516	63008	60307	61026	62621	62161	62357	72878	123638	114364	115108	95219	87101	80855	74767	77276	79583	118068	118693	111116	162013	68129	64022	63805	63495	62320	63501	62830	63071	0.226
44.886	61724	62867	59722	61068	62451	62068	62427	74192	112340	109501	102921	86448	81812	76987	71977	73864	76207	102694	123859	114421	147853	68754	63351	63072	63201	61806	64087	63447	63019	0.228
44.902	62039	62814	59309	60735	62102	62529	62810	76586	101025	101420	91576	79195	78477	74024	69889	71920	73359	90230	120990	119236	137386	68247	63357	63513	63234	61229	64282	63866	63270	0.23
44.917	61933	62205	59265	60621	62430	62418	62858	80254	92004	91863	82332	75928	75897	71816	68662	70030	71094	81432	108007	119190	129850	68103	63040	62822	62902	60996	64134	64508	63693	0.229
44.933	62247	61404	59508	59978	61791	62120	62674	85192	84818	82501	75708	74406	72860	70519	67196	68554	68657	76810	93042	111832	124223	68394	62719	62810	63111	61161	63732	63804	63616	0.231
44.949	61965	61642	59093	60091	61489	62120	62998	91186	79825	76047	72285	72476	71589	69502	67250	67366	67405	73893	80709	98751	116909	67530	62695	62937	63279	61049	63116	63829	63519	0.229
44.965	61744	60801	59109	59816	61348	62439	62774	97538	75555	72218	70408	72568	70003	68498	66268	66312	65756	72608	74431	85172	109557	67462	62409	62646	62877	61374	62750	63809	63399	0.228
44.981	62298	60500	59070	59802	61068	62109	62989	103093	73049	69052	69913	71444	68832	67638	65590	65306	65751	72044	70751	76945	101150	67672	62885	62326	62314	60728	62588	64160	63318	0.231
44.996	62314	60167	59116	59856	60808	62001	63315	107066	70494	67701	68883	70226	68438	66729	65548	64700	65112	71686	69171	71339	94421	67993	62231	62513	62743	60743	61691	63531	63303	0.231
45.012	62913	59765	59462	59529	60573	61805	63320	110376	69649	67181	68383	69635	68235	66110	64925	64303	64490	69860	68529	69136	89080	69097	62633	62374	62652	60703	62421	64096	63851	0.235
45.028	63369	59345	59331	59246	60528	61908	63491	111442	69306	67186	68139	68937	67260	65352	64094	63140	64220	68778	67943	66933	84590	70317	62941	62047	61845	61194	61120	64901	64306	0.238
45.044	63389	59650	59757	59453	60383	61741	64114	113300	67989	67312	67253	68765	66417	64379	63352	62351	63001	67133	67415	66163	81358	70702	63601	62070	61844	61400	60891	64508	64638	0.238
45.059	62798	59145	58659	58998	59697	61782	63991	115468	67603	66338	66412	68419	65557	63916	62564	61923	61728	66344	66871	65444	77853	73129	63142	62009	61643	60854	61444	64673	65240	0.234
45.075	62210	59369	59122	59327	60039	61435	63904	116372	67154	66642	65630	67533	64555	63197	62497	61858	61675	65725	66149	64390	73690	75727	63294	61647	61680	60678	61652	63610	64621	0.231
45.091	61179	58923	58594	58564	59870	61280	63865	117280	66840	66398	65372	67213	64387	62796	62713	61623	61125	64932	65767	65184	71245	78557	62949	61780	61682	60709	60404	62838	63942	0.224
45.107	60855	58677	58623	58386	59509	61210	63898	116699	66867	65740	64530	66241	63281	62507	62970	60903	60836	64907	65028	65469	67825	81604	63182	61478	61452	60235	60723	62379	62622	0.222
45.122	60621	58671	58905	58466	59305	60725	64203	114774	66402	65506	64939	65493	62689	62648	62606	60708	60544	63941	64681	65647	66802	86606	63442	61443	61099	60140	60492	61930	62593	0.221
45.138	59929	58390	58531	58345	59036	61111	64595	111145	65816	64639	65186	65281	62873	62755	63218	60812	60717	63481	65005	64996	65982	91462	63581	61661	60681	60383	59481	62018	61496	0.216
45.154	59979	58419	58142	58693	58915	60455	64457	107090	65181	63705	64942	64285	62173	62487	64160	60311	60561	63091	64545	64152	65605	96709	63657	61146	61177	60385	60208	61621	61621	0.217
45.17	60442	58143	58742	58278	59222	60870	64783	102350	65129	63970	65123	64111	62569	62680	65640	61283	60831	62543	64932	63505	65646	101944	63688	61232	60943	60342	59984	61537	61941	0.22
45.186	59805	58161	58273	58973	59270	60730	64850	98246	64153	63355	64573	63981	62527	63039	66944	61337	61408	62211	64098	62338	65248	106365	63463	60587	60771	60273	60316	61736	61516	0.216
45.201	59205	58318	58630	58442	59041	60635	65342	94203	64241	63189	64220	63136	62339	63839	69155	62136	62808	61903	63555	62084	64283	109069	63731	61129	60870	60045	60221	60867	61086	0.212
45.217	58936	58553	58458	58566	59293	60672	66170	91285	63985	62905	63989	63539	62831	65198	71011	63817	63902	61178	63764	61524	63551	110647	63691	61244	60463	59887	60347	60242	61604	0.21
45.233	58689	58479	57204	58139	58894	60394	66736	87725	63578	62004	63624	62764	62788	67156	72239	65955	65690	61290	62944	61642	63333	110939	64429	60781	60614	60133	60400	60441	60889	0.208
45.249	58728	58559	57529	58433	59086	60237	67360	85342	63143	61562	63628	62968	63214	68725	72978	67528	68205	61087	63241	61826	62810	110761	64257	61097	60398	59672	60227	59687	60389	0.209
45.264	57896	58557	57727	58644	58643	60166	68368	81520	62592	61879	63152	62681	64046	70918	71872	70155	70345	60863	62865	61272	61941	109327	64056	60217	60946	59926	60219	60430	59268	0.203
45.28	58372	58306	58191	58481	59089	60210	70080	78791	62168	60831	63519	62432	66307	71646	70255	71130	71325	61079	62828	61303	62068	109029	63776	60617	60084	59823	60031	59571	60030	0.206
45.296	58183	58786	57420	58366	58294	60166	71790	75485	61881	60920	63609	62263	67399	71925	69235	70491	71008	61103	63130	60450	61379	108340	63925	60142	60480	59753	60440	59516	59635	0.205
45.312	58034	58535	57809	57920	59051	59780	73732	73464	61857	60903	63833	62123	69581	70399	67521	69176	69102	61586	62513	60128	60832	107478	63947	60381	60431	59679	60647	59994	59376	0.204
45.327	58252	58322	57946	58347	58651	59752	76983	71957	61608	60982	63601	62431	70681	69716	67104	67267	67223	62048	62181	60118	60821	104858	63899	60527	60339	59505	60479	59606	59389	0.206
45.343	58086	58180	57913	57820	59029	60084	80168	69812	60875	61314	63336	62982	71545	67844	67710	65811	65933	62674	62608	60592	60941	102061	63994	60549	60601	59543	60730	59615	59447	0.205
45.359	58299	58253	57687	58917	58552	60033	84143	68523	61732	61900	63132	63603	70434	67223	67644	65428	65504	64712	62087	60013	60207	99185	63966	59760	60455	59632	60147	59426	59488	0.206
45.375	58287	58572	57472	58281	59272	60164	87759	67924	60947	62464	62784	64777	68757	67218	66021	65865	65206	65937	61934	60186	59525	94277	64110	59672	60308	59488	60061	59969	59847	0.206
45.39	58705	58239	57780	58587	58938	59878	90841	66870	60597	61971	62627	66636	67885	66651	65437	65653	65932	68264	61783	60169	59551	90531	64390	59939	60575	59808	60385	59979	59692	0.209
45.406	58540	58213	57162	58193	58783	60136	93565	65605	60429	62629	62406	68373	66521	66378	64258	65681	65347	69403	61505	61058	59296	85817	65158	60857	60747	59208	59850	60169	59673	0.208
45.422	58508	57991	57419	57873	59415	60118	96167	65273	60762	62565	63048	69821	66229	66132	63246	64038	64853	69711	61823	60986	59486	81767	64817	60136	60856	59474	60006	60176	59888	0.207
45.438	58805	57997	57781	58398	59217	59859	97963	64430	60430	63174	63268	70577	66622	65027	62460	62973	63292	69605	61796	61359	59171	77981	66101	59940	60963	59669	59672	60077	59741	0.209
45.454	58499	57979	57859	58120	58732	59871	99623	64316	60211	62056	63503	70179	66290	63883	61068	61910	62289	67427	62057	62074	59462	75308	65706	60153	60505	59014	59930	60328	59918	0.207
45.469	58101	57871	57327	58421	58589	60360	100327	63539	60210	62952	64096	69416	65349	62465	61482	60606	61584	66092	62418	62643	59503	72584	67201	60020	60515	58984	59984	60340	60457	0.205
45.485	58816	57745	57555	58098	59252	60146	101751	63293	60638	62998	65326	67298	64576	61898	61194	60134	60414	65091	63311	62255	59346	71095	67696	60356	61277	59847	59806	60182	59841	0.209
45.501	58145	57640	57995	58137	59086	59907	102411	62997	60540	63314	66334	66391	63642	61126	61271	59797	59863	64518	63947	62012	58933	68200	68432	60394	60994	59810	59267	59937	59825	0.205
45.517	57911	57693	58014	58444	59207	60398	102069	62431	60809	63880	67936	65735	62436	61268	60916	60102	59924	65020	65598	62264	58951	67464	69722	60803	60681	59319	59772	60220	59471	0.204
45.532	57787	57883	57972	58489	59469	60110	101540	62410	60707	64128	68461	65893	61512	60752	61100	58984	59707	64856	67055	62351	59189	65972	70253	60351	60848	59517	59428	59409	59944	0.203
45.548	58222	57781	58257	58831	59265	60368	99697	62426	60788	64347	69657	65719	61179	61139	60970	59750	59401	64755	68827	62310	59361	63681	71982	60982	61427	59476	59491	59918	59676	0.206
45.564	57992	57778	58397	58733	59375	60762	97109	61966	60773	64619	69224	65969	60808	60811	60471	59373	58848	63826	69403	62661	59009	62522	73374	60773	61156	60169	59699	59909	59848	0.204
45.58	58300	57623	58778	58811	59661	60644	95609	61832	61350	64691	68021	65131	60366	60731	60681	59256	59116	63008	67943	62943	59613	61773	75618	61056	61494	60390	59392	60065	59694	0.206
45.595	58290	58273	58443	58905	59338	60988	92643	61655	61922	65950	67122	63920	60813	60333	60169	58992	59056	61400	67176	63877	59377	60976	77732	61077	61443	60130	59332	59884	59443	0.206
45.611	58159	57868	59022	58940	59761	61141	91057	61932	61895	66444	66275	63462	60873	60546	60516	59326	58837	60982	65320	64333	60169	60720	80158	61426	61338	60193	59332	59827	59893	0.205
45.627	58506	58768	58840	58942	59570	61854	88987	61795	62456	68061	66077	62342	60379	60134	61366	59085	59003	60210	64444	65196	59815	60845	82371	60832	61831	60318	59620	59950	59571	0.207
45.643	58360	59041	58948	59095	60651	62416	87041	61960	63534	68754	65847	62138	60504	60942	60912	59142	59257	59403	64009	65884	59568	60072	84981	61169	61426	60948	60379	60079	59758	0.206
45.659	59472	59212	59567	60018	60877	63142	84738	62172	64291	69666	66371	61746	60667	60947	60385	59377	59039	59241	64600	67502	60019	60768	87458	61260	62417	61121	60523	60119	59834	0.213
45.674	60619	60086	60379	60782	61710	63474	83479	62950	64714	69597	66207	61968	60962	61715	61381	59151	59069	59832	64767	68287	60273	60276	90148	61616	62261	61077	61473	60232	60081	0.221
45.69	61448	61257	61155	61641	62569	65201	82195	63722	66509	69555	66262	62534	62376	61974	62017	60284	59463	60052	64854	68979	60790	60599	92399	61789	63291	61776	61588	60941	60780	0.226
45.706	63338	62938	62980	63518	63767	66806	81191	64905	69111	69810	66372	64043	63333	63263	62763	60929	59873	60235	64306	68633	61721	60952	93726	62381	64433	63051	62635	62148	61822	0.238
45.722	65143	64965	64942	65532	65842	68886	81695	66829	71151	70751	67554	65180	64541	64710	64526	62872	60469	60829	63955	68206	63634	61474	96591	62501	65489	64506	63667	63217	62981	0.249
45.737	67632	66995	66937	67571	67961	72201	81527	68842	73251	72445	68982	66714	66841	66277	66553	64997	61710	61764	64069	68208	64725	62420	98249	64192	67203	66781	65447	65032	64799	0.265
45.753	68920	68750	68369	68788	69335	74366	82769	71302	76000	73738	70114	68838	69079	68868	68857	67509	63630	63458	64834	68416	67326	64004	99885	65182	70242	67844	67990	67607	66904	0.273
45.769	70253	70521	69967	70679	70440	77287	82758	72460	78157	75529	71666	70570	70387	70532	70167	69074	65110	65157	66048	70323	70375	66057	101223	67335	71476	70606	69815	69148	67872	0.281
45.785	70813	71379	70649	71926	72592	79089	82966	73579	79865	76075	72265	71367	71247	71475	71254	71232	67481	67337	67886	72483	73110	67686	104161	69364	73438	71890	71226	70881	70346	0.285
45.8	70598	71483	71213	71752	72805	81098	82599	74745	80329	75608	72988	72312	72288	72346	72264	73104	68617	68864	69794	74109	76581	69778	104956	71901	74346	72907	72369	71810	72081	0.284
45.816	70991	71709	70878	71815	73253	82602	81587	74974	80309	75195	72874	73379	72331	72595	72410	72944	70075	70640	70920	76284	78677	71441	106304	73383	74789	73150	73402	72079	71874	0.286
45.832	73241	72913	71600	72636	73187	84833	81264	75501	79462	75035	72937	72812	72631	73018	72787	70821	71270	71928	72465	75602	80502	72322	106799	75737	75582	73589	73797	72500	72522	0.3
45.848	74893	74468	73773	74623	74862	88563	81584	77075	79661	74599	73338	73281	72624	73075	72910	69841	71690	72843	73126	75435	80656	73415	105825	75421	75116	74563	74360	73820	73210	0.311
45.864	79479	77333	76479	76756	76987	94258	83202	79135	80979	76078	74642	74687	75272	74739	74923	72391	71532	72582	72368	74840	79651	73863	105033	76446	76883	75062	75454	74111	74293	0.34
45.879	89363	84623	84011	83276	82425	102377	87360	83859	84511	79560	78054	78030	76997	77265	77163	77655	71167	71083	71398	72877	78214	73127	101941	75774	76641	75530	74474	74359	74132	0.402
45.895	92842	92047	91173	91716	90911	114706	95728	93532	92370	86980	86074	85633	84658	84335	84421	80865	70760	71266	71317	72710	77178	72880	101065	75109	79284	77561	77694	77271	76649	0.424
45.911	84877	86459	88785	90076	90981	118777	97170	95857	94361	90939	89800	89794	89732	89632	89659	79968	73606	73398	73131	74124	78938	75122	99866	76621	87412	85291	84878	84876	84064	0.374
45.927	75032	77175	78952	80615	81784	113015	88416	87890	86751	83502	83234	83964	83665	83862	84703	75940	80318	78880	79297	79044	83804	80273	102365	81408	92721	90545	90254	89903	89865	0.312
45.942	69342	70155	71552	73640	73734	106751	80279	79671	78504	74169	74409	74918	75311	75809	76444	71054	84378	83942	84460	84295	88805	86698	106214	87281	86825	86029	84807	83890	84641	0.276
45.958	68160	68240	68732	69874	70390	105324	75953	75990	73690	70524	70769	70678	70709	71134	71366	67941	81055	82592	82828	83545	89007	87756	104392	88584	79027	77716	76647	76492	75846	0.268
45.974	68621	68243	68206	69127	70018	105599	75614	73993	71271	69263	69255	69371	68837	69693	70368	66614	74263	75830	75804	76097	81723	82806	96550	84438	74241	73366	72232	72721	71766	0.271
45.99	71556	70187	69352	69830	71020	105805	75918	74513	71337	69611	68773	69419	69084	69647	69474	68126	69635	70195	70327	70457	75017	76637	88086	78483	72867	70772	70074	69750	70010	0.29
46.005	74498	73153	72810	73294	73928	109445	77819	76880	72645	70567	70868	70267	70719	71194	71076	70357	67636	67152	67408	68007	71184	72901	83034	74538	71271	69947	69235	69268	68494	0.308
46.021	73596	74267	74392	75108	77218	112215	81392	79780	75861	74557	74267	74168	74281	74056	74716	70152	66840	66881	66783	66860	69474	71159	79672	73642	73254	70753	70054	70255	70659	0.303
46.037	68743	69636	70506	72253	74228	109186	79329	78413	74464	73103	73211	74459	74212	74491	74991	68974	68642	67916	67594	67940	69869	71753	79306	74612	76631	74331	74196	73761	73293	0.272
46.053	64015	65018	65559	66666	69431	103205	73838	73020	69799	69051	68526	69242	70133	70303	71686	66006	70813	70329	69812	69903	71055	73121	80251	77234	76371	74490	74085	73323	73189	0.242
46.068	61673	62357	62757	63604	65516	98806	69890	68991	65215	64653	65230	65744	66033	66640	67452	63615	71479	71527	70982	70684	72555	74604	80239	79060	72007	71293	70123	69781	69542	0.227
46.084	60435	61008	60713	61979	64127	94834	68179	66916	63729	62880	63532	63732	63920	64276	64595	62201	68469	68937	68563	69184	71041	73654	78354	78711	68891	66442	66353	65680	65350	0.219
46.1	59581	60068	60228	61186	63351	92259	66525	64874	62489	61675	61962	62460	62833	63250	64034	61694	64510	65771	64560	65158	66390	69685	72560	75650	66274	63964	64309	63085	63433	0.214
46.116	59439	60344	59342	60133	63083	89432	65331	64621	61369	60642	60936	62317	62608	63240	62982	61055	62948	62996	62486	62448	63408	67108	69205	73442	64890	62561	63223	61704	62617	0.213
46.132	59175	60009	59044	59509	63396	87998	64450	63766	61099	60592	61359	61869	62196	62640	63042	61122	61793	61849	60793	60978	62302	65407	66468	71864	64067	61285	62517	60882	60919	0.212
46.147	58770	59064	58744	59869	63207	85203	64310	63101	61022	60477	60831	61395	61721	61882	62861	61116	61187	61349	60658	60220	61016	64085	64724	71822	63251	61144	61489	60859	60853	0.209
46.163	58895	58782	57942	59022	62688	82956	63802	63051	60290	60209	60485	61263	61792	62726	62399	60674	61516	60954	60213	59756	60443	62812	63243	72173	63732	61134	61353	60750	60000	0.21
46.179	58599	58813	58290	59176	63336	81247	63016	62269	60101	60073	61281	61501	61480	61851	61926	60377	61016	60555	60175	59485	60475	62307	62142	71409	63169	60724	61105	60399	60503	0.208
46.195	58273	58593	57752	58597	63642	79875	62535	62295	60279	60014	60643	61388	61239	61410	61859	60632	60933	60206	60062	59489	59898	61319	62055	72301	63222	60638	61180	60490	59907	0.206
46.21	58738	59371	57950	58633	63643	78168	62518	62222	60014	59915	60311	60630	61324	61575	61346	59683	61005	60387	59831	59307	59652	61538	62113	72764	63201	60106	60378	59843	59913	0.209
46.226	58771	57969	58134	58764	63755	76600	62597	61553	60393	60169	59993	60607	60785	60952	61622	59510	60353	60058	60007	59401	59487	61667	61600	73187	63190	60191	60105	60156	60071	0.209
46.242	58699	58438	57460	58590	64771	75822	62466	61006	59937	59893	59755	60349	60650	61263	60834	59416	60025	59469	59572	59337	59257	61345	60915	73712	62866	60008	60089	60545	59775	0.209
46.258	59005	57925	57620	58721	64775	74470	61526	61810	59819	59240	60277	60144	60263	60713	61315	59147	59918	59697	59545	59222	59361	60947	60838	74240	63015	60250	60839	60424	60005	0.21
46.273	59526	57940	57924	58183	65736	73960	61594	61331	59358	59498	60164	60497	60566	61222	61023	59251	59604	59425	59597	59245	58806	60849	60458	74636	62784	60100	60046	60562	60886	0.214
46.289	59201	58201	57358	58380	66980	73611	61978	61077	59248	59599	59628	59968	60728	60083	60786	58726	59765	59220	59372	58999	58671	61022	60228	75396	62824	59901	60396	60410	60289	0.212
46.305	59311	57464	57381	59015	68293	72567	61782	60624	59321	59372	59800	60091	60117	60519	60145	59065	58904	58990	59246	59163	58829	60773	60174	75528	62581	60141	60059	60101	60644	0.212
46.321	58488	57638	58013	58608	70856	71825	61995	60635	59351	59391	59696	60041	60221	60020	60194	59269	59034	58928	58716	58642	58635	60151	59818	75620	62972	60519	59765	60440	60028	0.207
46.337	58502	56912	57771	58804	73099	70881	61688	60617	59236	59104	59221	59889	60087	60263	60287	58801	58900	59417	58766	58894	58669	60336	59409	75735	62837	60321	59739	60112	60215	0.207
46.352	58209	57339	57388	58479	75603	70219	62536	60037	59635	59489	59704	60264	60012	60178	60036	58901	59124	59259	58963	58588	59023	60319	60370	76657	62672	59905	60067	59674	60069	0.205
46.368	57999	57689	57414	58820	78539	69684	62713	60125	59369	59594	59549	59728	60087	60116	59610	58469	58758	59363	58852	59001	58582	59852	60272	77121	63049	60128	59302	59784	59847	0.204
46.384	58350	57615	57238	59388	81876	69530	62712	60211	59179	58979	59630	59682	60220	60031	59669	58266	58486	59071	58155	58030	58402	60364	60634	77772	63128	60424	59504	59765	59629	0.206
46.4	58082	57028	57142	59410	84285	68442	63098	60616	59100	59331	59689	59773	59946	60296	59756	57954	57996	59104	58274	58556	58436	60012	60527	77673	63067	59962	59669	59428	58977	0.205
46.415	57836	57166	57312	58556	85098	67653	63365	60886	59353	59260	59347	59916	60044	59707	60144	58573	58607	58767	58341	58628	58332	59754	61164	78251	63414	60091	59504	59528	59369	0.203
46.431	57917	57071	57414	59171	86617	67236	63360	60178	59208	59247	59160	59674	59698	59825	59986	58515	58474	58534	58195	58547	58457	60039	60939	77768	63381	60144	59448	59896	59787	0.204
46.447	58034	57277	57508	59274	87137	67105	63797	60762	59167	59152	60253	60477	59915	59985	60574	58227	58130	58417	58927	58509	58730	60062	61422	78347	63391	59965	59297	59501	59653	0.204
46.463	57980	57270	57298	59098	87364	66273	63830	61130	59705	58988	59594	60269	59708	60143	60146	58469	58231	58598	59484	58180	58661	60204	61685	78403	63215	59788	59302	59030	58879	0.204
46.478	57673	57216	57696	59173	87858	65467	63652	61103	59304	59729	59850	59679	60303	60380	60699	58610	58569	58986	58926	58816	58310	60352	60790	78068	63180	59526	59144	59013	59112	0.202
46.494	57593	57437	57509	59475	87177	65711	63264	61273	59847	59494	59747	60125	60084	60733	61194	59317	58516	58874	59079	58592	58634	59894	60730	78002	63221	59739	59417	59319	59072	0.202
46.51	57179	57347	56974	59687	87130	65646	63025	61694	60292	59458	59883	60270	60422	60830	61636	59470	58831	59115	58855	59033	58804	60800	60512	78326	64169	59862	59212	59035	59264	0.199
46.526	57401	57151	58401	59796	86228	64893	62493	61480	60568	60206	60091	60880	61289	61052	62589	59837	59286	59272	59035	59317	58661	61132	60151	78836	64299	60123	59470	59034	58815	0.2
46.542	57351	57090	57593	60145	85443	64008	62867	62236	60841	60089	60569	61387	61281	62061	63522	60479	59980	59098	59008	59086	59044	61764	60508	78599	64545	60451	59670	59240	58949	0.2
46.557	57564	57469	57907	60487	84501	64083	62061	62417	61345	60347	60748	62415	62977	62921	65361	61681	61099	59351	58935	58793	59481	61754	60989	78205	64929	59878	59119	59345	58507	0.201
46.573	57769	57731	58189	61034	82778	63805	61727	62169	62216	61171	61791	62672	63688	64808	67091	63243	61661	59406	59158	59489	59740	61470	60546	78131	65575	60025	59417	58641	58833	0.203
46.589	57209	57087	58615	60470	81275	63818	61600	61918	62446	61367	62335	64270	65644	66795	68322	64742	63375	60610	59387	59239	60677	61407	60902	78099	65552	60506	59773	59202	58378	0.199
46.605	56930	57354	58290	60455	79700	63162	61366	61172	62749	62254	63710	65542	66897	67678	69694	66571	65001	61569	60388	59365	61025	60682	60429	77923	66135	60173	59700	58635	58698	0.197
46.62	56941	57326	58874	60408	78687	63452	61232	61549	63460	63359	64220	67593	67853	69534	69578	68158	66633	63263	61051	60490	61510	60120	60887	78029	66136	60954	59618	58548	58855	0.197
46.636	57224	57073	58268	59632	78016	62058	60864	61153	63152	63317	65306	67390	68777	69503	69791	68958	68102	64801	61924	61325	62305	60175	60179	77144	66650	60558	59724	59232	58657	0.199
46.652	56805	56808	59291	60243	76388	62352	60947	60618	63067	64793	66529	67339	68455	69443	68757	67870	68915	66950	63534	61562	62842	60649	59542	76338	66871	61213	59273	58914	58840	0.197
46.668	57193	57789	59867	60024	74994	62943	60747	60481	62685	64741	65749	66298	66734	67318	67514	66408	68119	67285	64475	62355	62533	60141	60201	76342	66912	61296	59475	58874	58993	0.199
46.683	57065	57462	59867	59907	74077	62303	60073	60759	62191	64727	65170	65409	66397	66862	67033	64803	67145	67427	65565	63596	61963	59976	60159	76085	66820	61474	59175	58720	58241	0.198
46.699	57569	57346	60742	60165	73350	62074	60022	60089	61651	63846	64211	64361	65271	65875	66639	64387	65782	65839	65507	64431	61358	60176	59694	74696	66993	62396	59476	59515	58714	0.201
46.715	57008	57310	61582	60385	72291	62106	60258	60001	61830	63235	63209	63817	65095	65234	66398	64489	64684	64633	64929	64051	60597	59786	59523	74045	67699	62618	59907	58892	58594	0.198
46.731	56928	58036	61822	59610	71619	61447	59846	59727	61420	62534	63122	63982	65063	66058	66550	64634	64181	63777	63572	63665	60076	59079	59882	73167	68061	63096	60220	58860	59512	0.197
46.746	56841	57295	61388	59835	71121	61229	59361	59467	61332	62274	63120	63646	65293	65695	66905	64311	64824	63036	62149	62582	60601	59010	60080	72767	67732	63680	59817	59183	58763	0.197
46.762	57773	58091	61479	59829	70461	61353	59965	59179	60779	61611	63394	64269	65064	65733	66826	64862	65401	63234	62294	61639	60772	58905	59933	71130	68124	63789	59791	59112	58619	0.203
46.778	57575	57891	60791	59552	70173	61490	60067	59418	60634	61697	63045	63518	64740	65556	66856	64207	65161	63768	61626	61331	60723	58455	59836	71538	68444	62823	59882	58648	58925	0.201
46.794	57270	57492	60314	60125	70323	61490	59349	59293	60413	62078	62519	62777	64539	65882	66901	64167	65470	63462	62726	61711	60300	58624	59620	70406	68959	63211	59727	59066	58833	0.2
46.81	57195	57471	60031	60580	69489	61006	59916	58715	60016	61747	62079	62531	63321	65028	66797	64467	65642	62908	62466	61446	59618	58948	59796	69036	69076	62761	60486	58735	58660	0.199
46.825	57343	58353	59913	60483	69791	61065	59488	59057	60040	61033	61532	61217	63092	65354	66115	64386	65226	62526	62258	61699	59698	58185	59405	68369	69391	62359	60301	58842	58872	0.2
46.841	57155	58608	59674	60887	68766	61429	59714	58903	59616	60357	60393	61044	63446	65590	64999	64258	65359	61497	61383	61546	58706	58305	59249	66974	70421	61819	59986	59536	58806	0.199
46.857	57651	58376	59881	60988	69087	61502	59129	58696	58850	60175	60009	60741	63771	64935	63925	64469	64218	60902	60505	60432	58369	58703	59115	66245	70770	61892	61123	59435	58640	0.202
46.873	57500	58866	60027	61518	68261	61413	59271	58986	58577	59195	60127	60782	64571	64812	63368	63658	63982	60731	59941	59832	58404	57998	59600	65290	71417	62564	60358	58823	58883	0.201
46.888	57025	59986	59558	61979	68410	60696	59217	58547	58972	59803	59704	60637	64898	64303	63269	62100	63186	60611	59597	59489	58194	58136	59330	65269	72664	62276	60781	59093	58732	0.198
46.904	57454	59707	59069	62132	68341	61013	58834	58758	59071	59265	59564	61184	64411	63538	62770	61597	61775	61269	59562	58828	58599	58032	58818	63807	72998	61996	61580	59702	58975	0.201
46.92	57748	60428	58914	62752	68308	61410	59425	59023	58700	59087	59724	61541	64394	62814	62890	60876	61039	61691	58646	58245	57997	57798	58999	63449	74446	61495	62342	59103	58981	0.203
46.936	57507	60745	58378	63656	68462	61622	58999	58509	59022	58713	59601	62437	63621	62669	62620	61207	60814	62524	59204	58429	57733	58353	59362	62809	75785	61136	62774	59813	58994	0.201
46.951	57519	61460	57620	65043	68112	60844	59231	59019	58724	58726	59459	63150	62724	62551	62923	61204	61350	63256	58296	58098	58172	57738	58622	62437	76719	61662	62477	59590	59550	0.201
46.967	57628	61482	57683	66016	68337	60808	59793	58655	58529	58862	59457	63405	62492	62327	62340	61241	61605	63561	58742	58364	58348	57815	59064	61585	77911	61666	62877	59405	59381	0.202
46.983	58075	60901	58426	68196	67869	60654	59254	58811	58741	59164	60405	64095	61304	62296	62002	61030	61252	63360	59127	58303	57901	57929	58653	60492	79112	61037	63145	59960	59207	0.205
46.999	58807	60414	57939	70985	67621	61252	58880	58853	59085	59163	60241	64079	62157	62079	61512	60458	60810	62829	59168	58237	57948	58068	58551	60829	80674	61989	63057	60073	59552	0.209
47.015	58235	60046	57954	75368	67889	60948	58849	58818	58391	59118	61131	63653	62215	61194	61339	59717	59998	61372	59103	58231	58221	57761	59163	60631	83254	61712	62235	60564	59481	0.206
47.03	58352	59627	58122	81348	67628	61274	58895	58828	59013	59032	61599	62402	61700	61239	60755	59666	59861	61036	59848	58129	57803	58146	58520	59953	84671	61850	62057	59938	60566	0.206
47.046	59174	60025	57935	87876	67676	61066	58893	58893	58777	59906	62303	62547	61498	60501	61233	59197	59871	60922	60856	58197	58040	57591	58661	59912	86233	61751	62315	60922	60232	0.212
47.062	59689	59361	58317	97013	67545	60828	59008	59277	58189	59450	63208	61858	61181	60918	60059	58869	59456	61464	61878	58510	57422	58216	58473	59564	87818	62802	62006	61989	60388	0.215
47.078	60216	59662	58707	104607	68077	60917	59548	59016	58861	60194	63437	61801	61067	59928	60588	59483	58921	61374	62379	58443	57993	58107	58789	59273	90394	62815	62091	61812	61306	0.218
47.093	60822	59118	58660	109338	67873	60775	59426	58476	59102	59852	63638	62276	60365	60350	61375	58839	58954	61007	63539	58444	57830	58028	58428	59251	92134	63030	61634	62260	61421	0.222
47.109	61010	59301	59055	109785	68029	61003	58925	58796	59421	60355	62893	61634	60580	60496	61501	58781	59074	60975	62647	59081	58180	58330	58517	59493	93209	63846	61876	62341	62036	0.223
47.125	60445	58660	59531	107511	67845	61359	58871	59287	58780	61517	62132	61405	60194	60578	62380	58693	59420	60073	61866	59277	58216	58048	58287	59157	94841	64618	61708	62749	62039	0.22
47.141	60200	58202	59958	104788	68399	61277	59474	58819	59158	62397	61841	61242	59995	60568	63297	59180	59552	59488	61254	59782	57744	57956	57958	59348	94473	65024	61554	62062	62202	0.218
47.156	59488	57967	60527	101771	67863	61052	59247	58478	59606	62697	61547	60600	59762	60984	64359	59648	59851	58781	60504	60258	58033	58296	58263	59052	94725	65083	61049	61259	61948	0.214
47.172	59057	58113	61314	101850	68244	60280	58792	59004	59513	63149	61353	60432	59913	60790	65722	59768	60508	59042	60525	61362	58174	58063	58175	59418	93366	66631	61741	61785	61523	0.211
47.188	59320	58181	61521	103401	68546	60748	59483	59372	59773	62848	61061	59571	59866	61614	68432	60716	61220	59161	60978	62596	57741	58382	58318	59023	91452	67326	61437	61611	61045	0.212
47.204	59300	58124	61824	104590	68598	60873	58377	59226	59550	61970	62004	59719	60256	62700	71160	61490	62624	59429	60691	62114	58741	58032	58610	58963	88592	68063	61344	61547	60785	0.212
47.22	59586	58217	62084	104989	68687	61075	59434	59001	60409	62387	61503	59688	60412	63724	73770	62526	63749	58642	60890	62214	58656	58011	58344	59391	85371	69050	61732	61700	60931	0.214
47.235	59180	57773	62072	104388	68684	60869	59486	59212	60952	61481	61213	59687	60907	65098	76835	63710	66052	58952	60709	61758	59006	58221	58083	59530	82852	70827	61926	61532	61138	0.212
47.251	59073	58537	63343	101404	68582	61079	58864	59269	61036	61096	60690	59793	61306	66609	79012	65927	68685	58999	59772	60863	59378	58020	57823	59801	82056	72274	62400	61887	61546	0.211
47.267	58575	58800	64771	97499	69250	61375	59346	59274	61912	61797	60375	59715	62105	69448	80712	69398	72342	58977	59733	60482	59670	58335	58597	59464	79939	75600	62906	61249	61003	0.208
47.283	58278	59313	66366	93906	68547	61423	59411	59458	62064	61464	59919	60339	62308	71861	81720	72001	75197	59396	59061	60293	59981	58597	58383	60166	78652	78407	62922	61051	60913	0.206
47.298	58434	59912	69011	90169	68691	61426	59887	59856	61539	61337	59687	60093	63355	74465	82602	73974	76944	59449	59087	60564	60454	58538	58527	60515	76876	83345	63560	61040	60449	0.207
47.314	58298	60021	72615	87439	68974	61263	59844	59769	62850	61317	59921	60516	65003	76548	84863	76813	77451	59378	58611	60483	61311	58089	58481	60358	75038	88804	64541	61015	60632	0.206
47.33	57881	60302	78351	85501	68942	61529	59797	60003	62480	60701	59584	60532	66622	78267	86366	77529	78666	59914	58887	60553	62279	58409	58207	60841	72647	95763	64862	60417	60306	0.203
47.346	57997	60992	84936	83395	68934	61559	60348	60647	62218	60967	59878	60680	68569	79024	87951	77577	80086	60130	59063	60542	62030	57944	58760	60931	70464	104263	65776	60695	60560	0.204
47.361	57904	61445	95465	81826	68728	61649	59594	61113	61949	60221	59283	60651	70457	80395	87486	78260	81633	61268	58899	59874	62292	58736	58729	60732	68401	112020	66383	61050	60826	0.204
47.377	58121	62364	108481	80219	68787	61999	60473	61624	61775	60281	59597	61096	72720	80986	87473	80034	84119	61696	58722	59957	61559	59232	59037	60784	67236	119568	67649	61491	61128	0.205
47.393	58305	62587	123116	78454	68833	62149	60336	62299	61594	60166	60428	62137	74799	83317	85533	82447	85609	63193	59197	59575	60839	59225	58967	60961	66006	125472	68534	61687	61352	0.206
47.409	57966	63948	135523	76527	68543	62448	60812	61940	61594	60265	59895	63336	75471	85118	83878	84538	86450	64656	59137	59308	60765	59230	59214	61405	65669	125110	70506	61920	61560	0.204
47.424	58812	64649	140251	75463	68724	62862	61470	62488	61784	60184	60249	64511	76795	87235	82442	86198	85674	65411	59206	59328	60895	59900	59222	61876	64882	122188	72603	62410	61935	0.209
47.44	58481	65956	135985	73253	67936	63162	61748	62799	61162	60298	60325	65893	78308	87578	81261	86162	84362	68048	59738	59479	60936	60254	59358	62317	64287	113650	75073	62737	61512	0.207
47.456	58931	68729	127222	71838	67929	63086	61403	63053	61818	60139	61211	66432	79535	87248	80799	84469	82107	69959	59920	59563	61159	60962	59781	62409	64241	105459	79121	63758	62218	0.21
47.472	59164	72410	119586	70564	67516	63623	62337	62668	61627	60262	61211	68061	80802	86084	79286	81908	80888	70540	60359	59262	60311	61708	59774	62199	63342	99362	83814	63625	62774	0.211
47.488	59214	77916	114765	70141	67660	64410	62544	62627	60744	60645	61893	68612	82696	83696	77607	79809	79775	72409	60821	59528	61180	62370	59776	62974	63214	96237	90920	65091	63408	0.212
47.503	59548	86319	112505	68419	66768	64814	62451	62347	60513	60149	62497	68833	85168	81953	75803	79717	79082	72821	60993	59550	60496	61883	60228	62853	63184	95782	99585	65155	63539	0.214
[truncated: 158 more rows]

## Sheet: Insitu - HR 
Angle	Li 0,5	Li 0,55	Li 0,6	Li 0,65	Li 0,7	Li 0,75	Li 0,8	Li 0,85	Li 0,9	Li 0,95	Li 1	Li 1,05	Li 1,1	Li 1,15	Li 1,2	Li 1,25	Li 1,3	Li 1,35	Li 1,4	Li 1,45	Li 1,5	Li 1,55	Li 1,6	Li 1,65	Li 1,7	Li 1,75	Li 1,8	Li 1,85	Li 1,9	Li 1,95	Li 2	Li 2,05	Li 2,1	Li 2,15	Li 2,2	Li 2,25	Li 2,3	Li 2,35	Li 2,4	Li 2,45
16	0	0	-165	-165	-165	0	-165	-164	-165	-165	-164	-165	-164	-165	-165	-164	-164	-164	-165	-165	-164	-165	-165	-164	-165	-164	-166	-164	-165	-165	-165	-164	-165	-165	-165	-165	-165	-164	-164	-164
16.016	0	3	151	-135	-95	299	74	19	-165	-165	-98	-369	-79	-164	-51	54	40	276	-164	-164	-163	-67	-70	-24	-164	-164	-165	75	-165	-165	-164	-14	-235	-216	-165	-237	-765	34	228	98
16.032	-37	0	-53	-83	18	79	-198	60	-165	-51	54	24	17	-164	-66	431	-133	54	-268	-139	70	-335	68	-135	-164	-109	-151	126	7	-85	-115	246	-119	81	93	88	92	-425	409	-221
16.047	184	-41	-129	71	-95	-13	-149	-124	-68	-150	-132	-149	-163	-205	-165	54	-62	-135	204	8	139	-19	-165	-27	-200	187	-165	164	-103	68	-48	65	70	274	-46	-209	42	-67	196	5
16.063	-18	29	5	-84	227	105	-165	306	180	-165	35	-165	-156	181	5	349	-80	190	269	-144	143	-136	-182	39	192	77	-165	-8	-39	34	129	-167	438	131	19	-107	-26	127	215	-43
16.079	114	133	162	-553	1	247	-108	-27	-210	-47	67	-11	72	151	-288	-67	13	244	129	284	100	-26	234	40	-26	-141	13	388	-238	-169	108	-98	353	-212	-470	-133	-363	-10	171	327
16.095	19	16	-291	77	251	-222	-130	-138	209	204	34	-279	-170	-161	60	330	55	-102	10	195	232	235	403	-5	411	-41	-260	4	26	-25	-295	83	156	-149	79	322	1	148	251	4
16.11	59	41	55	19	344	109	-2	-70	-89	-20	184	59	-32	-98	65	-113	57	248	89	180	-67	107	75	241	373	49	282	150	-18	-217	-128	293	274	-43	8	79	-168	36	147	-26
16.126	344	-68	-74	52	280	-34	-33	-165	-165	-86	358	60	-305	138	138	210	239	156	-234	-98	-344	18	211	241	257	33	-167	315	163	165	561	-123	343	-106	-186	235	207	281	199	251
16.142	289	-131	325	-17	-27	350	-10	-136	-37	-31	176	-119	58	-163	-42	-191	-21	123	105	98	67	-166	135	341	-236	284	91	349	100	105	166	399	16	21	-35	-64	14	199	183	365
16.158	-244	14	126	34	-111	136	407	391	3	89	3	125	-60	11	3	261	77	223	-193	20	189	231	104	34	-1	656	-254	582	6	4	245	321	160	252	123	-128	50	166	403	409
16.174	255	116	287	168	162	283	-145	215	184	-38	95	-109	94	-312	238	-148	-3	-95	-1	238	232	-68	244	144	311	209	272	257	111	-371	569	241	206	118	1	198	-34	381	376	259
16.189	-89	-41	-204	-378	-11	-222	288	37	79	18	115	-399	-7	204	-143	209	165	-15	135	341	211	339	-16	188	165	403	229	496	96	-11	417	203	460	-34	-89	157	166	76	529	149
16.205	-254	-120	27	267	206	-5	-81	96	105	-166	416	87	191	52	167	-11	-48	719	181	-186	37	123	90	169	236	191	58	17	320	141	386	214	168	78	63	169	133	498	391	-111
16.221	188	100	86	135	166	20	-63	241	-249	-102	-39	226	-217	-39	-28	-80	-164	335	63	280	203	290	347	284	242	24	220	-48	73	354	170	243	383	115	132	226	274	-216	435	206
16.237	52	-47	260	220	295	161	51	138	183	60	448	-238	-166	69	-167	-191	244	190	61	-48	426	372	184	242	563	472	258	483	122	76	549	70	461	182	129	51	181	255	694	224
16.252	-7	70	113	323	208	-18	238	203	17	-193	-83	105	98	39	-326	253	-11	283	-81	92	60	70	35	-29	122	397	186	308	292	64	409	327	364	279	-34	-34	88	391	-41	363
16.268	-106	287	197	462	432	33	0	372	240	51	153	157	-51	-51	458	-146	-93	111	298	436	255	173	446	211	660	302	135	535	295	305	594	382	601	216	257	135	364	264	533	217
16.284	276	94	239	159	398	42	71	93	168	-211	256	-298	-144	-122	142	-6	416	422	119	67	324	460	454	68	466	377	204	246	226	116	290	639	562	354	279	140	319	566	419	355
16.3	361	42	68	672	607	-162	-167	35	-212	90	-323	-67	153	-68	264	-167	228	404	396	192	143	152	377	459	477	258	467	587	160	297	417	353	390	419	242	130	297	307	541	316
16.315	88	-122	383	652	317	121	-96	-57	-135	8	4	-101	221	197	-7	-40	209	387	319	372	337	373	597	507	724	352	332	470	387	204	283	296	781	45	171	89	377	831	839	728
16.331	-75	262	289	343	475	-5	-154	-67	230	-180	240	-100	58	-94	14	280	416	669	232	486	171	450	252	446	375	447	614	400	433	174	744	433	927	566	431	391	171	335	566	328
16.347	-68	112	372	405	190	46	-110	-332	119	264	17	128	199	-171	4	-185	339	368	17	-55	298	87	426	261	327	772	161	615	411	263	401	431	665	165	339	217	196	433	541	598
16.363	141	-33	624	89	406	267	148	67	323	110	-194	202	-105	106	196	63	548	726	376	694	139	599	558	533	367	462	495	199	533	541	538	537	329	312	421	477	53	425	615	579
16.379	117	29	657	390	352	269	-72	45	450	-33	-27	15	162	-64	53	293	203	231	445	147	339	221	505	596	597	376	501	306	393	849	619	776	712	290	663	407	235	707	859	558
16.394	123	-17	100	326	275	-319	129	126	364	19	125	31	389	-179	34	21	703	557	11	565	484	380	430	364	279	444	436	688	735	421	556	744	612	608	549	473	524	588	447	436
16.41	-74	-76	569	470	469	119	-153	236	-42	163	90	135	452	97	57	204	461	503	364	473	461	7	416	548	123	424	217	464	546	359	230	544	831	425	249	364	338	172	501	391
16.426	-2	9	939	598	527	458	221	35	128	55	8	-56	260	-227	-17	-298	457	686	582	281	290	-125	213	516	801	540	598	300	567	316	594	348	427	320	342	501	200	339	781	398
16.442	322	-73	830	701	858	319	211	-300	-90	-155	245	-167	21	32	-225	81	476	602	463	629	382	380	308	319	539	641	643	502	458	628	321	843	524	660	487	394	342	494	906	688
16.457	-267	176	722	830	476	181	-114	36	103	-534	-161	-151	-6	-14	-1	149	738	677	540	501	297	319	341	703	712	660	471	552	652	511	460	695	1096	643	444	365	289	459	348	674
16.473	317	370	623	792	736	51	-221	243	91	257	258	-10	-169	-169	-166	150	463	551	519	521	335	680	27	551	815	299	368	638	532	368	330	822	813	614	844	430	364	492	611	459
16.489	64	-52	731	653	566	129	125	73	34	-247	-54	-193	-119	-263	-8	-275	383	678	413	667	746	329	368	290	705	411	530	305	470	596	533	698	562	540	505	611	541	825	662	667
16.505	6	142	925	712	937	293	-154	125	-21	-170	-107	6	183	215	160	-158	581	1011	186	531	440	599	431	356	599	806	729	852	760	471	573	383	634	503	582	592	464	577	658	517
16.52	154	-71	348	1002	726	-313	-290	82	-116	-148	395	105	289	200	-45	203	734	758	308	594	475	644	539	987	705	747	641	837	313	863	788	659	878	512	472	556	265	875	717	626
16.536	-40	217	664	610	760	-26	153	-246	-112	23	255	-214	107	217	-34	86	485	444	526	392	685	521	713	673	440	650	640	732	718	653	969	787	827	424	832	623	725	519	777	738
16.552	-169	55	925	694	956	192	155	38	-493	-42	114	-31	119	-198	-170	-25	705	754	538	623	579	540	524	464	693	741	472	910	1168	419	706	551	973	600	582	993	650	839	902	571
16.568	117	394	796	626	722	21	-55	-237	96	-20	113	-199	195	113	-143	-205	881	974	553	665	679	792	657	749	660	885	728	698	764	604	1083	1040	731	870	589	466	530	755	958	712
16.584	113	17	888	1233	1111	71	218	-54	319	99	175	57	9	74	150	33	791	1075	653	969	729	703	417	652	636	995	750	787	527	481	1056	621	761	880	683	674	446	524	954	709
16.599	89	328	1149	1058	1062	291	-124	89	148	69	16	-278	-243	88	73	-335	807	1217	703	725	769	590	469	801	811	1128	658	732	557	602	726	994	1177	702	622	719	779	1019	942	677
16.615	129	247	967	1244	942	67	122	533	140	-220	-247	-61	150	194	145	-40	465	936	659	625	625	609	653	789	700	915	553	724	711	883	707	816	958	689	933	449	593	466	1001	776
16.631	255	245	1212	1332	1129	270	-159	-74	84	-45	-34	-164	-69	416	204	-157	836	809	690	675	409	724	463	579	673	655	658	833	837	441	1027	1051	627	849	1082	1013	696	992	1115	880
16.647	-11	97	989	1195	1472	7	259	193	149	-171	317	182	-59	-318	-270	174	861	1005	766	748	540	906	833	548	801	970	1015	682	675	593	705	1010	994	887	858	1021	681	551	813	1140
16.662	-45	225	1054	941	978	30	106	-17	-271	-41	-91	-388	121	-47	137	-37	812	1436	734	632	569	766	836	950	783	814	912	938	728	417	925	850	1061	1007	645	904	556	1245	783	534
16.678	9	66	745	1204	817	-319	-35	420	-148	154	210	285	-514	-74	60	-171	716	1086	882	1225	724	650	1084	1191	851	901	625	1158	697	908	838	877	999	916	678	771	732	1063	969	898
16.694	215	-72	1151	1215	1194	46	126	88	179	-85	70	82	-23	-284	299	-30	1049	1063	685	831	995	698	1189	788	998	1054	1271	671	924	852	953	877	887	803	620	734	622	980	1042	905
16.71	-1	-68	1090	1175	997	-55	-206	124	74	157	294	24	134	64	-6	295	1078	1184	1054	889	1005	1030	673	813	1108	1054	961	980	805	750	1187	1417	1035	1131	933	905	1057	835	808	755
16.726	37	66	1298	1097	1363	112	-135	264	288	-40	178	70	-18	309	179	202	1050	1226	1276	1158	873	1089	1036	1099	719	913	1061	1168	708	738	933	999	1156	1027	1100	907	456	1076	911	1060
16.741	159	5	1483	1542	1231	258	174	-209	128	156	383	-165	91	-39	-151	163	982	1382	1162	1037	454	695	1066	1135	891	1068	881	1366	874	931	1249	1551	1309	747	739	556	899	1290	1083	1235
16.757	204	55	1622	1190	1435	356	110	316	-159	67	316	-310	180	273	-55	-44	1372	1448	886	1375	1152	1240	1011	1244	1330	1478	969	1528	1022	889	1420	1143	1219	1136	852	888	994	795	1210	728
16.773	174	311	1604	1403	1500	300	-97	-273	369	231	233	258	-139	55	-173	148	1303	1405	1392	1440	1056	895	1167	924	1362	1252	1430	1120	1511	1126	1209	1250	1270	1190	1153	981	1120	941	1138	1225
16.789	216	93	1594	1153	1352	250	344	-111	-70	362	136	32	-138	166	298	-7	935	1342	1056	1197	1156	966	1159	1080	1533	887	1535	1058	930	1339	1276	1245	1336	713	956	751	1199	1279	1220	1070
16.804	-176	160	1768	1305	1142	385	318	286	256	-134	465	177	-173	269	115	318	1150	1234	1608	1226	1064	1181	964	1369	1594	1502	992	1427	1469	1446	1099	1278	1323	1218	1181	706	827	1195	1423	1540
16.82	316	272	1750	1557	1490	328	210	353	117	-173	-15	-51	60	311	-80	134	1479	1364	1030	1216	1124	1372	1205	1313	1375	1228	1258	1382	1304	1167	1288	1315	1385	1438	1192	1132	1095	1177	875	1132
16.836	181	292	1755	1615	1493	295	270	161	437	-57	300	-174	52	254	220	69	1654	1594	1404	1235	1310	1128	1250	1042	1727	1257	1331	1616	1236	1301	1453	1390	1606	837	1195	1523	1076	1315	1544	1613
16.852	220	314	1856	1572	1414	357	206	634	-198	-24	218	9	-31	343	-20	117	1619	1539	1349	1329	1396	1050	1186	1449	1548	1438	1567	1071	1344	1485	1460	1422	1609	1461	1070	1293	1344	1406	1450	1255
16.867	-64	31	1839	1722	1779	302	58	151	164	114	308	180	101	-77	298	34	1685	1253	1473	1437	1340	1494	1571	1526	1365	1903	1816	1608	1490	1690	1371	1671	1816	1447	1574	1378	1427	1368	1485	1136
16.883	20	149	1664	1421	1858	89	101	183	553	119	82	67	-76	135	60	257	1417	1700	1579	1876	1194	1417	1990	1818	1635	1717	1639	1356	1674	1288	1448	1527	1706	1258	1212	1457	1137	1307	1506	1248
16.899	144	228	2175	1639	2066	562	389	171	365	263	521	48	14	408	50	265	1778	1600	1353	1518	1664	1337	1349	1688	1708	1570	1711	1463	1276	1515	1801	1773	1948	1229	1669	1341	1423	1775	1855	1649
16.915	444	597	1580	1817	1722	-71	117	-13	534	560	240	152	290	316	148	368	1540	2008	1533	1538	1413	1548	1626	1353	1532	1419	1645	1677	1187	1344	1894	1693	1907	1444	1360	1532	1696	1411	1676	1521
16.931	109	6	2102	1999	1987	414	219	317	764	519	243	356	-83	144	83	499	1489	1830	1793	1461	1163	1417	1436	1415	1476	1698	1504	1668	1636	1656	1618	1565	1989	1570	1729	1341	1667	1634	2007	1408
16.946	569	368	2273	2069	2087	548	315	388	482	201	391	465	389	170	495	311	1648	1961	1636	1549	1597	1354	1561	1931	1786	1621	1493	2019	1326	1703	1813	1140	2060	1357	1686	1511	1486	1551	1626	1425
16.962	203	322	2100	2253	2196	338	81	281	101	322	432	122	248	58	423	201	1861	1697	1517	1627	1630	1614	1550	1364	1755	1495	1524	1912	2059	1254	1893	1534	1966	1526	1639	1450	1532	1574	2211	1761
16.978	225	489	2331	2245	2255	532	96	346	412	348	336	384	252	290	443	377	1948	2274	1808	1904	1938	1653	1755	1678	2389	1808	1726	1743	1803	1762	1867	2270	1863	1802	1593	1799	1803	1493	1889	1734
16.994	774	117	2631	2582	2601	796	402	496	774	526	861	483	319	606	601	747	1904	1887	1849	2079	1924	1290	1797	1833	2059	1901	1615	2247	1606	1570	1919	1741	1612	1576	1784	1557	1626	1846	1895	2033
17.009	841	592	2679	2633	2626	808	646	737	622	702	919	506	792	536	805	507	1940	2172	1836	2011	1777	1706	1847	1372	2072	2324	1833	2128	1804	1688	2038	1950	1650	2081	1888	1747	1684	1989	2030	1834
17.025	986	1056	3180	2963	3046	1273	1343	809	792	1044	1007	835	663	860	867	684	2366	2182	2161	2005	1841	1808	1987	1949	1966	2078	2024	2291	2041	2211	1568	2278	2332	1810	1672	1687	1908	1888	1761	1802
17.041	790	1016	3391	3243	3523	1448	1373	1450	954	956	1250	1102	1174	1003	858	1234	2547	2669	2042	2054	2325	2061	2106	1841	2126	2411	2002	2246	2060	2185	1717	2295	2445	1941	2002	1738	1650	1939	2138	1794
17.057	1111	1287	4141	3417	3922	2162	2307	1790	1750	1375	1270	1251	1287	1424	1059	1371	2784	3021	2472	2345	2488	2390	2160	2272	2287	2247	2150	2011	1938	2297	1893	2283	1972	1773	2132	2017	1848	1871	2160	1459
17.072	1872	2121	5236	4353	4933	3221	2517	2558	2691	2338	2033	2225	1603	1843	1583	1810	3308	3265	2909	2721	2297	2479	2263	2556	2426	2168	2288	2571	1892	1645	2296	1908	1853	2237	1968	1821	1967	1908	2076	1776
17.088	2706	3277	6521	5852	6307	4471	4053	3967	3784	3084	2820	2482	2173	2419	2296	2151	3637	3523	3242	2896	2922	2797	2898	2486	2584	2699	2362	2621	2391	2293	2251	2321	2373	2280	2421	2317	1739	1875	2156	2125
17.104	3789	4357	8979	7925	8453	6894	6336	5440	5002	4139	3827	3330	3184	3412	2956	2544	4803	4209	3451	3467	2894	3193	2822	2917	2743	2604	2789	2618	2392	2199	2333	2681	2456	2192	2140	1821	1889	2395	2155	1950
17.12	6112	7100	12930	10678	12229	10810	9933	8542	7068	6200	5097	4887	4175	3862	3660	3113	5349	4670	3664	3842	3610	3368	3502	2878	3013	2981	2779	2871	2484	2554	2233	2716	2413	2255	2705	2169	2145	1968	2437	2375
17.136	9871	10859	18381	15217	17634	16227	14721	12392	10289	8553	7565	6515	5992	5229	5136	4491	5913	5561	4695	4702	3976	4206	3537	3219	3261	2857	2882	2883	2977	2906	2603	3037	2869	2393	2414	2215	2685	2081	2565	2232
17.151	15756	17028	25802	21784	25072	23613	21602	17789	14238	11655	10154	8624	7740	7116	6317	5689	7179	6633	5755	4993	4742	4401	4463	3827	4161	3630	3435	3411	3079	2883	2968	2684	3055	2520	2508	2693	2148	2282	2797	2392
17.167	22400	24539	31851	29299	31604	29628	28474	24237	19467	15714	14036	11730	10366	9636	8203	7320	8427	7823	6811	6087	5712	4781	4837	4646	4208	3991	3644	3621	3552	3394	3267	3293	3145	2862	2723	2587	2858	2662	2890	2511
17.183	28368	29403	32182	31571	32006	29925	31392	29530	24890	20065	17180	15066	13484	11615	10472	9511	9781	9335	8051	6978	6688	6091	5610	4896	4668	4604	4057	3908	3931	3654	3520	3275	3328	3008	2693	3038	3020	2855	3031	3063
17.199	29212	28570	29655	29721	29264	27364	28987	31747	29966	24953	21940	19314	16658	14927	13060	11485	11686	10886	9618	8447	7584	6992	6340	6030	5320	5007	4499	4226	4206	3842	4008	3816	3362	3673	3430	3305	3427	2849	3200	2959
17.214	26051	25672	25134	25832	24693	22810	25245	29790	32860	29460	26990	24046	21032	17930	16012	14101	14362	12450	11484	9667	8788	8031	7371	6974	6688	5658	5421	4926	4235	4465	4275	4174	3896	4004	3238	3432	3390	3145	3366	3143
17.23	21484	20525	20167	20408	19343	17810	20805	25797	32603	35043	32139	29515	25813	22179	19760	17393	17226	15092	13252	11916	10777	9573	8707	8101	7182	6564	5963	5638	5409	5159	4812	4084	4149	3798	3399	3755	3225	3467	3744	3289
17.246	16144	14575	15058	15444	14062	12668	16118	22046	29815	37002	36413	33836	30530	27335	23632	20960	20050	18251	15779	14783	12854	12002	9959	9463	8457	8298	6890	6652	6129	5875	5322	5036	4537	4322	4180	3763	3372	3788	3818	3633
17.262	11476	10454	12510	11300	11270	10086	13069	18464	26767	37302	38628	37150	34349	32023	28078	25205	24713	21743	19269	17732	15501	13985	12624	11157	10271	9675	8098	7940	6784	7007	5879	5556	5455	4896	4396	4422	3916	4324	4397	4348
17.278	8012	7857	12013	9728	10492	9556	13025	16874	23862	34207	38068	38499	37187	35003	32762	29713	28314	26129	24082	21414	18939	16732	15751	13918	12687	11080	10127	9253	8048	7537	7224	6443	6190	5536	5483	5318	5022	4859	4590	4772
17.293	6934	7004	14279	9452	11252	11790	14173	17230	22166	28704	35117	36619	36859	36953	36759	34060	33558	30851	28122	25536	23155	20595	18700	16815	15191	13315	11582	11064	10014	9032	7880	7584	7164	6381	6536	5470	5302	5324	5307	5120
17.309	7507	8310	16978	11045	13820	14457	16508	18447	20455	23698	29367	33592	36251	37101	37927	37318	38107	35968	33802	30733	27704	25148	22819	20162	18297	16397	14105	12992	11901	10844	9712	9065	8734	7523	6969	6782	6237	6451	6377	5952
17.325	9570	11607	20193	13948	17443	17640	18796	18526	17518	18951	22731	28291	32545	35588	37864	38351	41204	40186	37995	36184	32859	30249	28035	24910	22611	20400	18130	16298	14053	12978	11894	11127	10080	8872	8391	8026	7554	7716	7292	7326
17.341	13868	15790	21923	18078	21272	19338	18187	16906	15015	13940	16706	22371	28331	32551	36048	38490	41466	42223	41666	40234	38547	35717	33199	30234	27719	24711	21989	20415	17570	15714	14448	13096	12324	11405	10226	9444	9013	9095	9350	8687
17.356	18229	19877	20757	21395	22278	18140	16295	14168	11629	9984	11711	16340	21686	27435	32381	35611	40620	42895	44037	44087	42805	40685	38672	36260	33381	30250	27157	25048	22279	19829	18005	16583	15417	14304	13252	12231	11311	11087	11218	11543
17.372	20852	21087	18378	22395	20605	15730	13694	11244	9367	6895	8211	10999	15944	21331	26709	31720	38308	41435	43635	44789	45610	45306	43995	41962	39740	37084	33366	31081	27736	24862	22889	21779	19665	17958	16716	15529	15094	14911	14859	15022
17.388	20583	19112	15293	20836	18363	12613	10001	8090	6290	4930	5161	7526	10959	15826	20477	25401	32565	37483	41132	44083	46180	47538	47531	47026	45519	43018	40535	37697	34179	31561	28796	27286	25368	23299	21717	20352	19694	19455	19106	19799
17.404	17951	16207	11635	17883	14466	8925	6795	5346	4333	3785	4154	4928	7248	10730	14593	19172	26355	31177	35961	40051	44502	47376	49212	50442	51097	49060	46483	44214	42131	38897	36401	34232	32055	30239	28606	26463	25612	25511	25243	25807
17.419	14147	12390	8522	14372	11106	5781	4433	3640	2875	2771	2632	3289	4672	7117	9560	13375	19325	24104	28725	33789	38866	43177	47212	49885	51999	53195	52067	51188	48536	46880	44375	42636	40841	38536	36725	34348	33133	32740	32618	33600
17.435	10144	8338	6705	10657	8183	3933	2560	2431	1721	2159	2142	2454	3029	4686	6601	9090	14270	18305	22448	26454	31653	36569	41405	46516	50456	53191	54992	55188	55141	53416	52256	50733	49696	47324	45886	44040	42328	41516	40794	40001
17.451	7039	5220	5098	7797	6134	2296	2096	1283	1261	1469	1805	1488	2323	2737	4134	5319	10359	12962	15512	19436	24152	28598	33527	38857	44834	49709	52702	55746	57872	57975	58790	58296	57909	56506	55192	53526	51438	49885	47633	45255
17.467	4244	3120	4632	5590	4813	1799	1402	932	954	1378	1171	1374	2108	1707	2670	3055	7449	8749	10801	13579	16790	21117	25646	30336	35699	41616	46264	51869	55033	58027	60146	61152	62669	62829	61959	60037	58265	55917	52043	48472
17.483	2644	2176	4307	4678	4049	1445	1112	768	1028	1062	826	982	1193	1432	1759	2365	5711	7064	7441	9765	12118	14630	18574	22383	27110	32416	37618	43189	48356	52600	57148	59893	62534	63377	64412	63522	62314	59929	56950	52153
17.498	1407	1311	3681	3947	3890	789	629	673	672	609	697	886	649	1453	1493	1539	4760	5537	5564	6965	8077	10706	12233	15801	20243	23955	28472	33911	38877	44010	48798	52811	56468	59152	61173	63054	62791	61456	59632	55656
17.514	966	1173	3718	3506	3944	796	543	656	446	674	582	315	942	975	1359	1155	4278	4255	4939	5477	6228	7140	8511	10350	13468	16706	20588	24462	29369	33772	37968	42931	47689	50879	54139	56873	58546	58840	58566	57545
17.53	1039	527	3595	3755	3393	644	-15	308	175	393	737	674	430	716	1000	939	3635	4339	4607	4549	4762	5587	6628	7578	9093	11633	14268	16720	20793	24590	28398	32559	35977	39857	42769	47105	50011	52662	54363	54896
17.546	1100	682	3072	3468	3700	92	357	435	436	277	555	568	388	836	934	874	3845	3708	3829	3976	4475	4835	5116	5867	6784	7956	9317	11992	13756	16619	19790	23130	25979	29107	32365	36010	39273	42756	46310	48137
17.561	564	322	3724	3871	3000	716	233	229	396	394	316	297	60	705	645	770	3680	3743	3597	3734	3816	4432	4831	5093	5432	6287	7098	8442	9662	11617	13673	15429	17737	20362	22478	25614	29116	32696	36295	38891
17.577	421	528	3514	2996	3502	476	411	-71	121	234	271	334	449	547	1016	846	3596	3695	3323	3192	3645	4161	3815	4553	4943	5306	5870	6619	7391	8306	9418	10670	12028	13772	15683	17514	20182	23140	26876	29860
17.593	664	416	3670	3848	3585	604	5	137	145	568	118	96	128	506	310	149	3051	3638	3374	3515	3443	3697	3585	4367	4426	4891	4825	5583	5937	6183	7003	7917	8384	9440	10483	12073	13768	15770	18603	21289
17.609	363	118	2759	3563	3591	-335	70	-262	22	214	92	-151	-17	142	226	430	3154	3221	3216	3323	3049	3347	3627	3637	3988	4165	4407	5179	5118	5389	5990	5817	6829	7122	7100	8559	9453	10773	12621	14581
17.624	829	214	3253	3625	3418	130	-18	425	81	360	-275	167	125	337	445	217	3014	3300	3057	3114	3393	3249	3591	3331	4355	3992	4005	4341	4497	4695	5391	5281	5714	5688	5917	6651	6958	7966	8931	9586
17.64	333	428	3190	3154	3268	39	134	186	-18	144	610	20	1	-129	437	319	3137	3279	3088	3134	3415	3276	3354	3258	4000	3663	3962	4440	4377	4615	4424	5127	4989	4718	5071	5497	5929	6333	6564	7059
[truncated: 2,051 more rows]

## Sheet: Initial
Angle	Intial
8	0
8.011	418
8.021	506
8.032	119
8.042	350
8.053	140
8.063	423
8.074	322
8.084	160
8.095	360
8.105	258
8.116	206
[truncated: 6,837 more rows]

## Sheet: Post-Mortem
Angle	Post Mortem
[truncated: 6,849 more rows]
